# Supplementary material for: Cu-Catalyzed tandem cyclization and coupling of enynones with enaminones for multisubstituted furans & furano-pyrroles
Source: Royal Society of Chemistry journal article supplement (doi:10.1039/d2ob00839d), 2022-01-01

## Supporting Information

### **Cu-Catalyzed Tandem Cyclization and Coupling of Enynones with Enaminones for Multisubstituted Furans & Furano-pyrroles**

Dattatri,<sup>ab</sup> Maneesh Kumar Reddy Singam<sup>ab</sup>, Jagadeesh Babu Nanubolu<sup>c</sup> and Maddi  
Sridhar Reddy<sup>\*ab</sup>

<sup>a</sup>Department of Organic Synthesis & Process Chemistry, CSIR-Indian Institute of Chemical Technology, Hyderabad 500007, India. <sup>b</sup>Academy of Scientific and Innovative Research, Ghaziabad 201002, India. <sup>c</sup>Analytical Department, CSIR-IICT, Hyderabad 500007, India.

| S.NO | Table of Contents                                             | Pages   |
|------|---------------------------------------------------------------|---------|
| 1    | General Information and methods                               | S1      |
| 2    | Experimental Procedures                                       | S1-S5   |
| 3    | Optimization Studies                                          | S5-S6   |
| 4    | General Procedure for title compounds and Characteristic data | S6-S20  |
| 5    | X-ray crystallography data                                    | S21-S52 |
| 6    | References                                                    | S55-S59 |
| 7    | Copies of <sup>1</sup> H and <sup>13</sup> C NMR spectra      | S60     |

## 1. General Information and methods.

All reagents and solvents were purchased from commercial sources and used without purification. NMR spectra were recorded with a 300, 400 or 500 MHz spectrometer for  $^1\text{H}$  NMR, 100 or 125 MHz for  $^{13}\text{C}$  NMR spectroscopy. Chemical shifts are reported relative to the residual signals of tetramethylsilane in  $\text{CDCl}_3$  or deuterated solvent  $\text{CDCl}_3$  for  $^1\text{H}$  and  $^{13}\text{C}$  NMR spectroscopy. Multiplicities are reported as follows: singlet (s), doublet (d), doublet of doublets (dd), doublet of triplets (dt), triplet (t), quartet (q), multiplet (m). HRMS were recorded by using QT of mass spectrometer. Column chromatography was performed with silica gel (100–200 mesh) as the stationary phase. All reactions were monitored by using TLC.

## 2. Experimental Procedures

### 2.1. Preparation of Enynones General Procedure (GP-1):

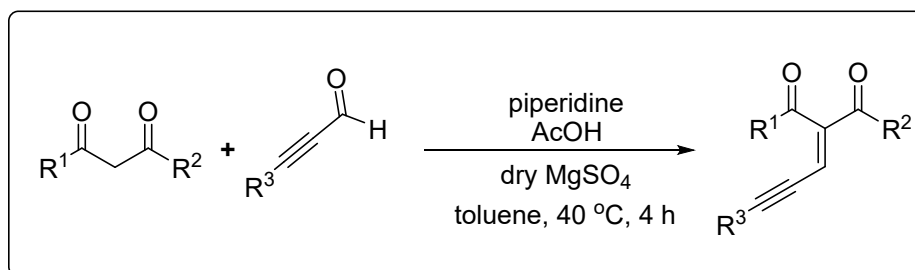

#### General Procedure for the Synthesis of 2a-2k:<sup>1</sup>

To a 25 mL round bottom flask, the mixture of 1,3-diketones (5 mmol), AcOH (0.2 equiv), piperidine (0.1 equiv) and dry MgSO<sub>4</sub> (1 equiv) was added to a solution of propionaldehyde (1.2 equiv) in toluene. The reaction was carried out at 40 °C stirring for 4 h while monitoring by TLC. After the completion of the reaction, the reaction mixture was filtered through *celite* and the resultant elute was concentrated to get the crude product. The enynone **2** was purified by chromatography on silica gel with the appropriate mixture of PE and EA in 60-90% yields (*Z/E* mixture, **1x** was isolated in 42% yield).

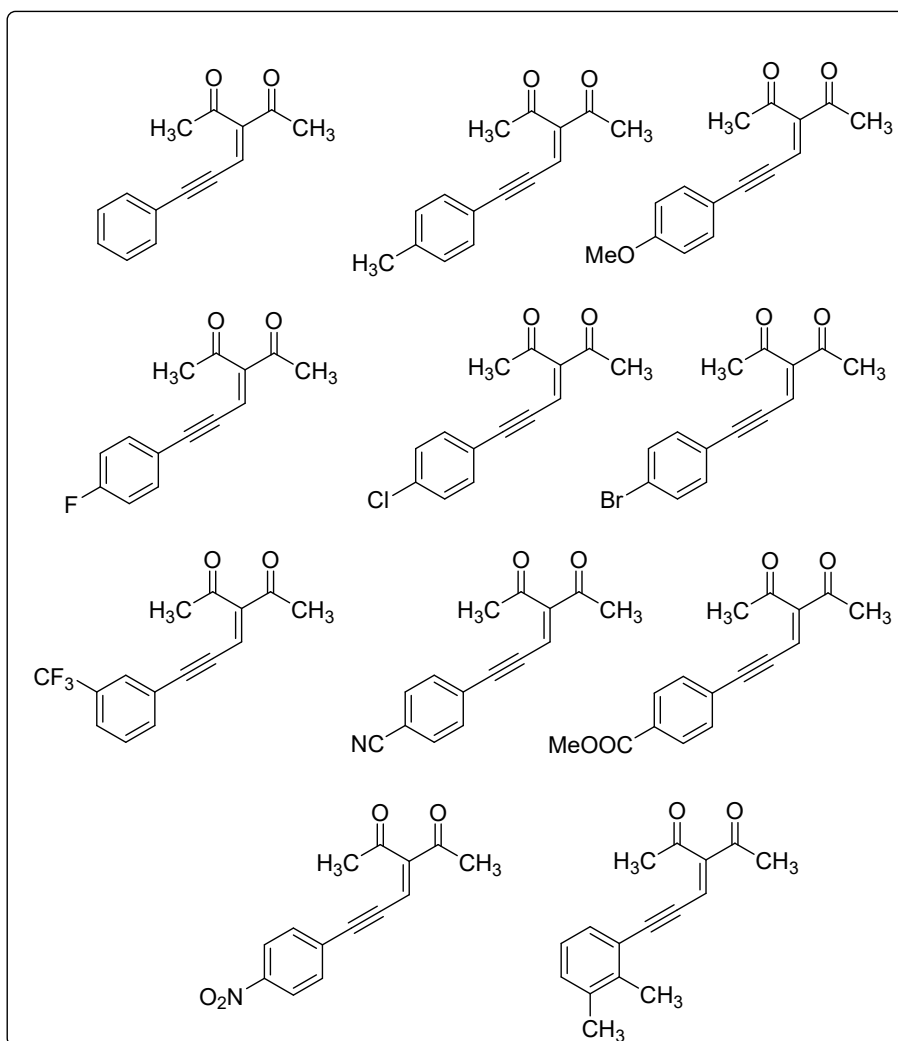

**Table S1: List of Enynes**

### 2.3. Preparation of Enaminones: General Procedure (GP-3):<sup>2</sup>

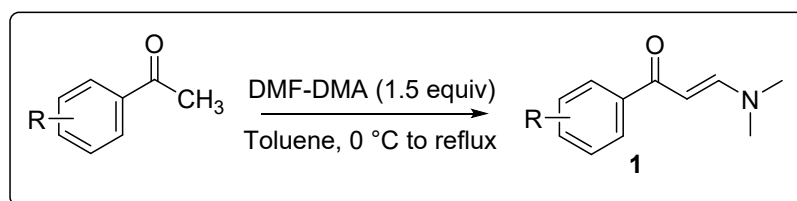

#### General Procedure for the Synthesis of 1a-1q:<sup>2</sup>

To a stirred solution of ketone **5** (5.0 mmol, 1.0 eq.) in 5.0 mL of toluene, 1,1-dimethoxy-*N,N*-dimethylmethanamine **6** (7.0 mmol, 1.4 eq.) was added and stirred at 110 °C. After completion of the reaction (monitored by TLC), it was quenched with water, extracted with ethyl acetate and dried with anhydrous  $\text{Na}_2\text{SO}_4$ . The reaction mixture was concentrated under reduced pressure and was purified by column chromatography (hexane:ethyl acetate = 1:1) to give the desired product **1**.

**Table S2: List of Enaminones.**

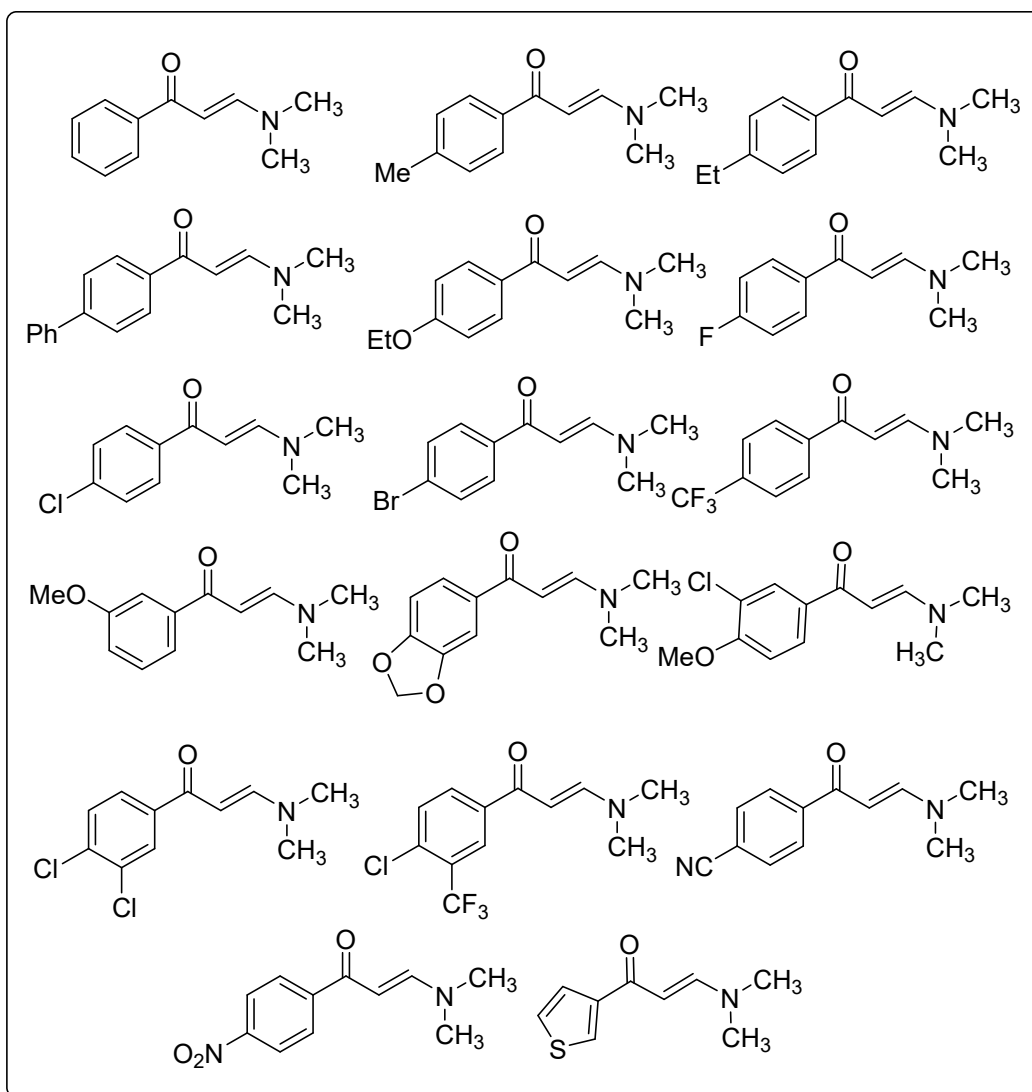

### 3. Optimization Studies

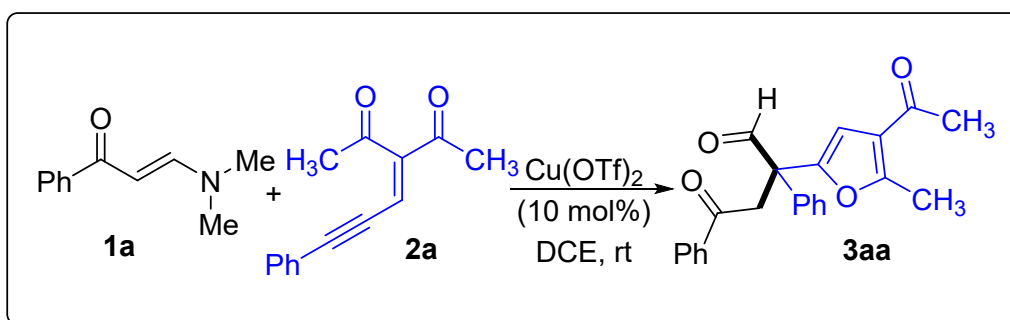

| Entry | Variation from the standard conditions               | Yield (%) <sup>b</sup> |
|-------|------------------------------------------------------|------------------------|
| 1     | None                                                 | 80                     |
| 2     | Cu(OAc) <sub>2</sub> instead of Cu(OTf) <sub>2</sub> | 40                     |
| 3     | AgOTf instead of Cu(OTf) <sub>2</sub>                | 60                     |

|    |                                                      |    |
|----|------------------------------------------------------|----|
| 4  | CuI instead of Cu(OTf) <sub>2</sub>                  | 10 |
| 5  | Cu(OTf) instead of Cu(OTf) <sub>2</sub>              | 19 |
| 6  | Zn(OTf) <sub>2</sub> instead of Cu(OTf) <sub>2</sub> | 2  |
| 7  | DCM instead of DCE                                   | 60 |
| 8  | THF instead of DCE                                   | 50 |
| 9  | CH <sub>3</sub> CN instead of DCE                    | 48 |
| 10 | 60 °C instead of rt                                  | 55 |

<sup>a</sup>Reaction conditions: **1** (1 equiv), **2** (1 equiv), Cu(OTf)<sub>2</sub> (10 mol%), DCE, rt for 15-30 min. <sup>b</sup> isolated yield.

#### 4. General Procedure-A for Cu-Catalyzed Cyclizative Coupling of Enaminones (**1a**) with Enynones (**2a**) and Characteristic data:

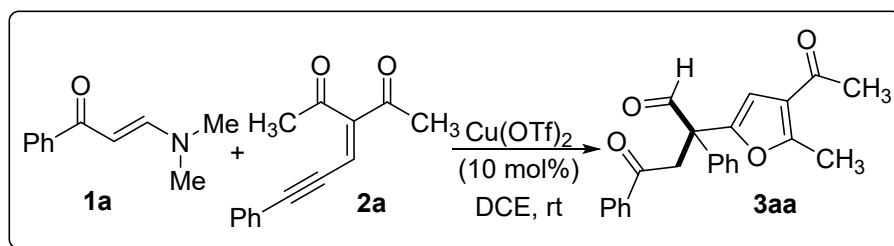

To a mixture of enaminone **1a** (52.5 mg, 0.3 mmol), enynone **2a** (63.6 mg, 0.3 mmol) in DCE was added Cu(OTf)<sub>2</sub> (10 mol%) into 10ml round-bottomed flask. The reaction mixture was stirred at rt in air for 15-30 min (monitored by TLC). After completion of reaction, the mixture was concentrated and was added with water and the aqueous layer was extracted with ethyl acetate (2×10 mL). The organic layer was evaporated and purified by column chromatography  $R_f = 0.50$  (SiO<sub>2</sub>, EtOAc:Hexane, 5:95) to get **3aa** as pale brown sticky solid in 80% (86.4 mg) yield.

##### 2-(4-acetyl-5-methylfuran-2-yl)-4-oxo-2,4-diphenylbutanal (**3aa**):

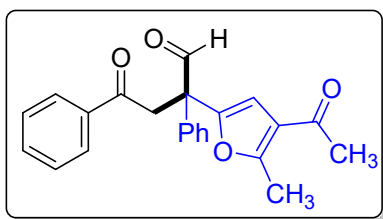

The title compound was prepared from **1a** (52.5 mg, 0.3 mmol) and **2a** (63.6 mg, 0.3 mmol) according to general procedure A. Purification using column chromatography ( $R_f = 0.50$ , SiO<sub>2</sub>, EtOAc:Hexane, 5:95) to give pure product as a pale yellow solid, (84.2 mg, 78 % yield). <sup>1</sup>H NMR (500 MHz, CDCl<sub>3</sub>) δ 10.09 (s, 1H), 7.95 (dd,  $J = 8.4, 1.2$  Hz, 2H), 7.62 – 7.55 (m, 1H), 7.49 – 7.44 (m, 2H), 7.39 – 7.34 (m, 2H), 7.31 (ddd,  $J = 8.5, 4.3, 1.3$  Hz, 1H), 7.24 – 7.21 (m, 2H), 6.64 (s, 1H), 4.16 (d,  $J = 1.8$  Hz, 2H), 2.50 (s, 3H), 2.40 (s, 3H). <sup>13</sup>C NMR (100 MHz, CDCl<sub>3</sub>) δ 196.5, 196.0, 194.1, 158.2, 150.7, 137.6, 136.2, 133.8, 129.1, 128.8, 128.3, 128.1, 127.8, 122.4, 109.3, 57.3, 45.3, 29.3, 14.6. HRMS (ESI) calcd for C<sub>23</sub>H<sub>21</sub>O<sub>4</sub> [M+H]<sup>+</sup> 361.1440, found 361.1429.

##### 2-(4-acetyl-5-methylfuran-2-yl)-4-oxo-2-phenyl-4-(p-tolyl) butanal (**3ba**):

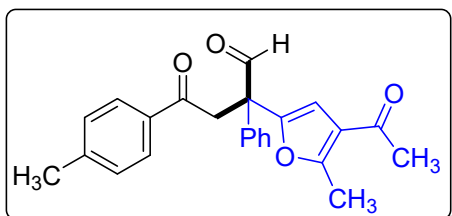

The title compound was prepared from **1b** (56.7 mg, 0.3 mmol) and **2a** (63.6 mg, 0.3 mmol) according to general procedure A. Purification using column chromatography ( $R_f = 0.50$ , SiO<sub>2</sub>, EtOAc:Hexane, 5:95) gave pure product as a brown colour sticky

solid (87.5mg, 78% yield).  $^1\text{H NMR}$  (400 MHz,  $\text{CDCl}_3$ )  $\delta$  10.09 (s, 1H), 7.84 (d,  $J = 8.1$  Hz, 2H), 7.37 (d,  $J = 6.9$  Hz, 2H), 7.31 (d,  $J = 7.0$  Hz, 1H), 7.26 (s, 2H), 7.22 (s, 1H), 7.14 (s, 1H), 6.64 (s, 1H), 4.14 (d,  $J = 2.9$  Hz, 2H), 2.50 (s, 3H), 2.41 (s, 3H), 2.39 (s, 3H).  $^{13}\text{C NMR}$  (125 MHz,  $\text{CDCl}_3$ )  $\delta$  196.6, 195.7, 194.1, 158.1, 150.9, 144.7, 137.7, 133.8, 131.5, 129.5, 129.1, 128.4, 128.2, 128.1, 128.0, 127.8, 127.6, 122.4, 109.3, 57.3, 45.3, 29.3, 21.8, 14.5. **HRMS (ESI)** calcd for  $\text{C}_{24}\text{H}_{23}\text{O}_4$   $[\text{M}+\text{H}]^+$  375.1596, found 375.1584.

#### 2-(4-acetyl-5-methylfuran-2-yl)-4-(4-ethylphenyl)-4-oxo-2-phenylbutanal (3ca):

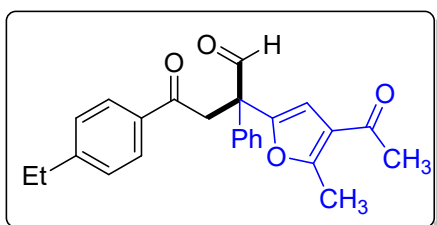

The title compound was prepared from **1c** (60.9 mg, 0.3 mmol) and **2a** (63.6 mg, 0.3 mmol) according to general procedure A. Purification using column chromatography ( $R_f = 0.5$ ,  $\text{SiO}_2$ , EtOAc:Hexane, 05:95) gave pure product as a pale brown colour sticky solid (83.8 mg, 72% yield).  $^1\text{H NMR}$  (400 MHz,  $\text{CDCl}_3$ )  $\delta$  10.12 (s, 1H), 7.89 (d,  $J = 8.3$  Hz, 2H), 7.39 (dd,  $J = 9.9, 4.6$  Hz, 2H), 7.34 (dd,  $J = 5.3, 1.7$  Hz, 1H), 7.32 – 7.27 (m, 3H), 7.24 (s, 1H), 6.66 (s, 1H), 4.17 (d,  $J = 2.0$  Hz, 2H), 2.73 (q,  $J = 7.6$  Hz, 2H), 2.52 (s, 3H), 2.41 (s, 3H), 1.28 (t,  $J = 7.6$  Hz, 3H).  $^{13}\text{C NMR}$  (100 MHz,  $\text{CDCl}_3$ )  $\delta$  196.6, 195.7, 194.1, 158.1, 150.9, 150.8, 137.6, 133.9, 129.1, 128.5, 128.3, 128.1, 127.8, 122.4, 109.2, 57.2, 45.3, 29.3, 29.1, 15.3, 14.5. **HRMS (ESI)** calcd for  $\text{C}_{25}\text{H}_{24}\text{NaO}_4$   $[\text{M}+\text{Na}]^+$  411.1572, found 411.1564.

#### 4-([1,1'-biphenyl]-4-yl)-2-(4-acetyl-5-methylfuran-2-yl)-4-oxo-2-phenylbutanal (3da):

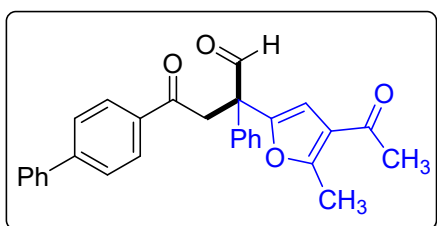

The title compound was prepared from **1d** (75.3 mg, 0.3 mmol) and **2a** (63.6 mg, 0.3 mmol) according to general procedure A. Purification using column chromatography ( $R_f = 0.5$ ,  $\text{SiO}_2$ , EtOAc:Hexane, 5:95) gave pure product as a brown colour sticky solid (98.1 mg, 75% yield).  $^1\text{H NMR}$  (400 MHz,  $\text{CDCl}_3$ )  $\delta$  10.13 (s, 1H), 8.04 (d,  $J = 8.0$  Hz, 2H), 7.70 (d,  $J = 8.0$  Hz, 2H), 7.64 (d,  $J = 7.4$  Hz, 2H), 7.49 (t,  $J = 7.3$  Hz, 2H), 7.46 – 7.37 (m, 3H), 7.35 (d,  $J = 6.9$  Hz, 1H), 7.28 (s, 2H), 6.69 (s, 1H), 4.21 (s, 2H), 2.54 (s, 3H), 2.42 (s, 3H).  $^{13}\text{C NMR}$  (125 MHz,  $\text{CDCl}_3$ )  $\delta$  196.46, 195.57, 194.07, 158.14, 150.76, 146.39, 139.72, 137.59, 134.86, 129.11, 129.08, 128.89, 128.47, 128.11, 127.77, 127.41, 127.36, 122.42, 109.32, 57.30, 45.33, 29.30, 14.53. **HRMS (ESI)** calcd for  $\text{C}_{29}\text{H}_{23}\text{O}_4$   $[\text{M}+\text{H}]^+$  437.1753, found 437.1746.

#### 2-(4-acetyl-5-methylfuran-2-yl)-4-(4-ethoxyphenyl)-4-oxo-2-phenylbutanal (3ea):

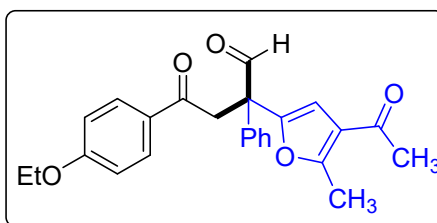

The title compound was prepared from **1e** (65.7 mg, 0.3 mmol) and **2a** (63.6 mg, 0.3 mmol) according to general procedure A. Purification using column chromatography ( $R_f = 0.4$ ,  $\text{SiO}_2$ , EtOAc:Hexane, 7:93) gave pure product as a pale brown colour sticky solid (84.8 mg, 70% yield).  $^1\text{H NMR}$  (400 MHz,  $\text{CDCl}_3$ )  $\delta$  10.09 (s, 1H), 7.95 – 7.87 (m, 2H), 7.39 – 7.33 (m, 2H), 7.33 – 7.29 (m, 1H), 7.25 – 7.20 (m, 2H), 6.91 (d,  $J = 8.9$  Hz, 2H), 6.64 (s, 1H), 4.11 (dd,  $J = 7.6, 6.0$  Hz, 4H), 2.50 (s, 3H), 2.39 (s, 3H), 1.44 (t,  $J = 7.0$  Hz, 3H).  $^{13}\text{C NMR}$  (125 MHz,  $\text{CDCl}_3$ )  $\delta$  196.7, 194.5, 194.2, 163.5, 158.1, 151.0, 137.7, 130.7, 129.1, 128.0, 127.8, 122.4, 114.4, 109.2, 63.9, 57.2, 45.1, 29.3, 14.7, 14.5. **HRMS (ESI)** calcd for  $\text{C}_{25}\text{H}_{25}\text{O}_5$   $[\text{M}+\text{H}]^+$  405.1702, found 405.1689.

### 2-(4-acetyl-5-methylfuran-2-yl)-4-(4-fluorophenyl)-4-oxo-2-phenylbutanal (3fa):

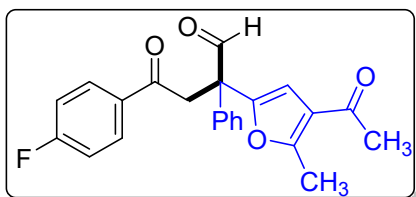

The title compound was prepared from **1f** (57.9 mg, 0.3 mmol) and **2a** (63.6 mg, 0.3 mmol) according to general procedure A. Purification using column chromatography ( $R_f = 0.5$ , SiO<sub>2</sub>, EtOAc:Hexane, 5:95) gave pure product as a pale brown colour sticky solid (82.7 mg, 73% yield). <sup>1</sup>H NMR (400 MHz, CDCl<sub>3</sub>)  $\delta$  10.07 (s, 1H), 7.97 (dd,  $J = 8.7$ , 5.4 Hz, 2H), 7.39 – 7.30 (m, 3H), 7.21 (d,  $J = 7.2$  Hz, 2H), 7.12 (t,  $J = 8.5$  Hz, 2H), 6.65 (s, 1H), 4.11 (s, 2H), 2.50 (s, 3H), 2.40 (s, 3H). <sup>13</sup>C NMR (100 MHz, CDCl<sub>3</sub>)  $\delta$  196.3, 194.4, 194.1, 167.4, 164.8, 158.2, 150.6, 137.5, 132.7, 131.0, 130.9, 129.1, 128.9, 128.2, 127.7, 122.5, 116.1, 115.8, 109.3, 57.3, 45.1, 29.3, 14.5. HRMS (ESI) calcd for C<sub>23</sub>H<sub>20</sub>FO<sub>4</sub> [M+H]<sup>+</sup> 379.1346, found 379.1334.

### 2-(4-acetyl-5-methylfuran-2-yl)-4-(4-chlorophenyl)-4-oxo-2-phenylbutanal (3ga):

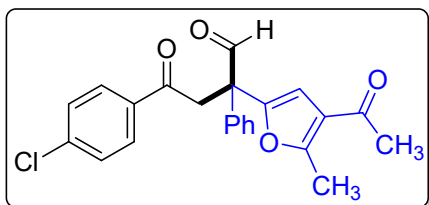

The title compound was prepared from **1g** (62.7 mg, 0.3 mmol) and **2a** (63.6 mg, 0.3 mmol) according to general procedure A. Purification using column chromatography ( $R_f = 0.50$  SiO<sub>2</sub>, EtOAc:Hexane, 4:96) gave pure product as a brown colour sticky solid (83.9 mg, 71% yield). <sup>1</sup>H NMR (400 MHz, CDCl<sub>3</sub>)  $\delta$  10.07 (s, 1H), 7.88 (d,  $J = 8.6$  Hz, 2H), 7.43 (d,  $J = 8.5$  Hz, 2H), 7.37 (t,  $J = 7.2$  Hz, 2H), 7.34 – 7.31 (m, 1H), 7.23 – 7.19 (m, 2H), 6.64 (s, 1H), 4.10 (s, 2H), 2.51 (s, 3H), 2.40 (s, 3H). <sup>13</sup>C NMR (100 MHz, CDCl<sub>3</sub>)  $\delta$  196.2, 194.8, 194.0, 158.2, 150.5, 140.3, 137.4, 134.6, 129.7, 129.2, 129.2, 128.2, 127.7, 122.5, 109.4, 57.4, 45.1, 29.3, 14.6. HRMS (ESI) calcd for C<sub>23</sub>H<sub>20</sub>ClO<sub>4</sub> [M+H]<sup>+</sup> 395.1050, found 395.1037.

### 2-(4-acetyl-5-methylfuran-2-yl)-4-(4-bromophenyl)-4-oxo-2-phenylbutanal (3ha):

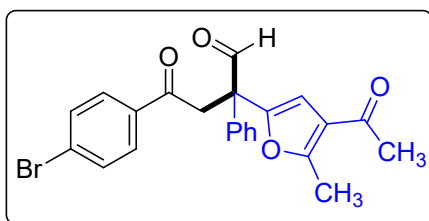

The title compound was prepared from **1h** (75.9 mg, 0.3 mmol) and **2a** ((63.6 mg, 0.3 mmol) according to general procedure A. Purification using column chromatography ( $R_f = 0.50$ , SiO<sub>2</sub>, EtOAc:Hexane, 5:95) gave pure product as a brown solid (93.2 mg, 71% yield), mp 135-137 °C. <sup>1</sup>H NMR (400 MHz, CDCl<sub>3</sub>)  $\delta$  10.06 (s, 1H), 7.80 (d,  $J = 8.5$  Hz, 2H), 7.60 (d,  $J = 8.5$  Hz, 2H), 7.41 – 7.30 (m, 3H), 7.20 (d,  $J = 7.1$  Hz, 2H), 6.63 (s, 1H), 4.09 (s, 2H), 2.51 (s, 3H), 2.40 (s, 3H). <sup>13</sup>C NMR (100 MHz, CDCl<sub>3</sub>)  $\delta$  196.2, 195.1, 194.0, 158.2, 150.5, 138.0, 137.5, 135.0, 132.2, 129.8, 129.2, 128.3, 127.8, 122.5, 109.4, 57.4, 45.0, 29.3, 14.6. HRMS (ESI) calcd for C<sub>23</sub>H<sub>19</sub>BrO<sub>4</sub> [M+H]<sup>+</sup> 439.0545, found 439.0541.

### 2-(4-acetyl-5-methylfuran-2-yl)-4-oxo-2-phenyl-4-(4-(trifluoromethyl) phenyl) butanal (3ia):

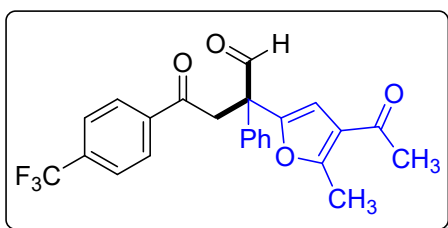

The title compound was prepared from **1i** (72.9 mg, 0.3 mmol) and **2a** (63.6 mg, 0.3 mmol) according to general procedure A. Purification using column chromatography ( $R_f = 0.5$ , SiO<sub>2</sub>, EtOAc:Hexane, 5:95) gave pure product as a brown colour sticky solid (78.3 mg, 61% yield). <sup>1</sup>H NMR (400 MHz, CDCl<sub>3</sub>)  $\delta$  10.06 (s, 1H), 8.04 (d,  $J = 8.1$  Hz, 2H), 7.73 (d,  $J = 8.2$  Hz, 2H), 7.40 –

7.31 (m, 3H), 7.23 – 7.19 (m, 2H), 6.65 (s, 1H), 4.14 (s, 2H), 2.51 (s, 3H), 2.41 (s, 3H). <sup>13</sup>C NMR (100 MHz, CDCl<sub>3</sub>) δ 195.9, 195.1, 194.0, 158.3, 150.3, 139.0, 137.3, 129.3, 128.6, 128.3, 127.7, 125.9, 125.9, 122.6, 109.5, 57.5, 45.1, 29.3, 14.6. HRMS (ESI) calcd for C<sub>24</sub>H<sub>20</sub>O<sub>4</sub> [M+H]<sup>+</sup> 429.1314, found 429.1304.

#### 2-(4-acetyl-5-methylfuran-2-yl)-4-(3-methoxyphenyl)-4-oxo-2-phenylbutanal (3ja):

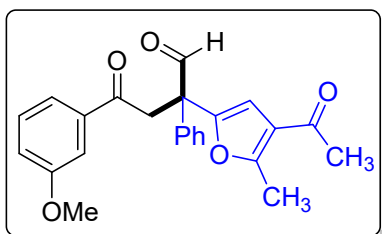

The title compound was prepared from **1j** (61.5 mg, 0.3 mmol) and **2a** (63.6 mg, 0.3 mmol) according to general procedure A. Purification using column chromatography (*R<sub>f</sub>* = 0.4, SiO<sub>2</sub>, EtOAc:Hexane, 8:92) gave pure product as a pale brown colour sticky solid (72.5 mg, 62% yield). <sup>1</sup>H NMR (400 MHz, CDCl<sub>3</sub>) δ 10.09 (s, 1H), 7.55 (d, *J* = 7.6 Hz, 1H), 7.44 (s, 1H), 7.37 (t, *J* = 7.5 Hz, 3H), 7.34 – 7.28 (m, 1H), 7.22 (d, *J* = 7.3 Hz, 2H), 7.13 (dd, *J* = 8.2, 2.4 Hz, 1H), 6.65 (s, 1H), 4.14 (s, 2H), 3.83 (s, 3H), 2.51 (s, 3H), 2.40 (s, 3H). <sup>13</sup>C NMR (125 MHz, CDCl<sub>3</sub>) δ 196.4, 195.9, 194.1, 159.9, 158.1, 150.7, 137.5, 137.5, 129.8, 129.1, 128.1, 127.7, 122.4, 120.9, 120.3, 112.4, 109.3, 57.3, 55.5, 45.3, 29.3, 14.5. HRMS (ESI) calcd for C<sub>24</sub>H<sub>23</sub>O<sub>5</sub> [M+H]<sup>+</sup> 391.1545, found 391.1534.

#### 2-(4-acetyl-5-methylfuran-2-yl)-4-(benzo[d][1,3]dioxol-5-yl)-4-oxo-2-phenylbutanal (3ka):

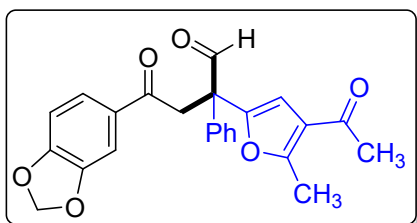

The title compound was prepared from **1k** (65.7 mg, 0.3 mmol) and **2a** (63.6 mg, 0.3 mmol) according to general procedure A. Purification using column chromatography (*R<sub>f</sub>* = 0.30, SiO<sub>2</sub>, EtOAc:Hexane, 8:92) gave pure product as a brown colour sticky solid (83.6 mg, 69% yield). <sup>1</sup>H NMR (400 MHz, CDCl<sub>3</sub>) δ 10.07 (s, 1H), 7.57 (dd, *J* = 8.2, 1.4 Hz, 1H), 7.36 (dd, *J* = 11.8, 4.5 Hz, 3H), 7.33 – 7.27 (m, 1H), 7.21 (d, *J* = 7.2 Hz, 2H), 6.84 (d, *J* = 8.2 Hz, 1H), 6.64 (s, 1H), 6.04 (s, 2H), 4.08 (d, *J* = 1.3 Hz, 2H), 2.50 (s, 3H), 2.39 (s, 3H). <sup>13</sup>C NMR (125 MHz, CDCl<sub>3</sub>) δ 196.5, 194.1, 194.1, 158.1, 152.3, 150.9, 148.4, 137.6, 131.0, 129.1, 128.1, 127.7, 124.7, 122.4, 109.2, 108.0, 102.1, 57.3, 45.2, 29.3, 14.5. HRMS (ESI) calcd for C<sub>24</sub>H<sub>21</sub>O<sub>6</sub> [M+H]<sup>+</sup> 405.1338, found 405.1330.

#### 2-(4-acetyl-5-methylfuran-2-yl)-4-(3-chloro-4-methoxyphenyl)-4-oxo-2-phenylbutanal(3la):

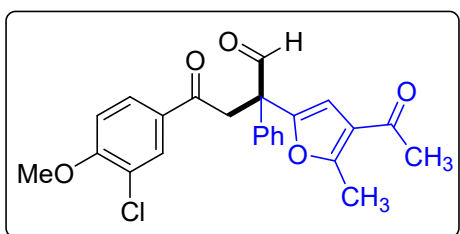

The title compound was prepared from **1l** (71.7 mg, 0.3 mmol) and **2a** (63.6 mg, 0.3 mmol) according to general procedure A. Purification using column chromatography (*R<sub>f</sub>* = 0.40, SiO<sub>2</sub>, EtOAc:Hexane, 8:92) gave pure product as a brown sticky solid (73.7 mg, 58% yield). <sup>1</sup>H NMR (400 MHz, CDCl<sub>3</sub>) δ 10.07 (s, 1H), 7.97 (d, *J* = 2.2 Hz, 1H), 7.86 (dd, *J* = 8.7, 2.2 Hz, 1H), 7.37 (dd, *J* = 8.1, 6.4 Hz, 2H), 7.32 (dd, *J* = 5.2, 1.8 Hz, 1H), 7.24 – 7.18 (m, 2H), 6.96 (d, *J* = 8.7 Hz, 1H), 6.64 (s, 1H), 4.07 (s, 2H), 3.97 (s, 3H), 2.51 (s, 3H), 2.40 (s, 3H). <sup>13</sup>C NMR (100 MHz, CDCl<sub>3</sub>) δ 196.3, 194.1, 193.7, 159.3, 158.2, 150.6, 137.5, 130.7, 129.8, 129.1, 128.8, 128.2, 127.8, 123.1, 122.4, 111.5, 109.3, 57.3, 56.6, 44.9, 29.3, 14.5. HRMS (ESI) calcd for C<sub>20</sub>H<sub>22</sub>ClO<sub>5</sub> [M+H]<sup>+</sup> 425.1156, found 425.1139.

#### 2-(4-acetyl-5-methylfuran-2-yl)-4-(3,4-dichlorophenyl)-4-oxo-2-phenylbutanal(3ma):



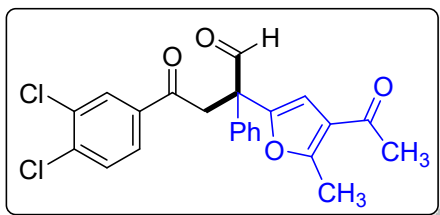

The title compound was prepared from **1m** (72.9 mg, 0.3 mmol) and **2a** (63.6 mg, 0.3 mmol) according to general procedure A. Purification using column chromatography ( $R_f = 0.50$ , SiO<sub>2</sub>, EtOAc:Hexane, 4:96) gave pure product as a pale brown sticky solid (80.9 mg, 63% yield). <sup>1</sup>H NMR (400 MHz, CDCl<sub>3</sub>)  $\delta$  10.04 (s, 1H), 7.99 (d,  $J = 1.6$  Hz, 1H), 7.75 (dd,  $J = 8.3, 1.6$  Hz, 1H), 7.53 (d,  $J = 8.3$  Hz, 1H), 7.41 – 7.31 (m, 3H), 7.20 (d,  $J = 7.2$  Hz, 2H), 6.65 (s, 1H), 4.06 (s, 2H), 2.52 (s, 3H), 2.40 (s, 3H). <sup>13</sup>C NMR (100 MHz, CDCl<sub>3</sub>)  $\delta$  195.8, 193.9, 193.8, 158.2, 150.2, 138.3, 137.2, 135.8, 133.5, 130.9, 130.3, 129.2, 129.0, 128.3, 127.7, 127.2, 122.5, 109.5, 57.5, 44.8, 29.3, 14.5. HRMS (ESI) calcd for C<sub>23</sub>H<sub>19</sub>Cl<sub>2</sub>O<sub>4</sub> [M+H]<sup>+</sup> 429.0660, found 429.0653.

#### 2-(4-acetyl-5-methylfuran-2-yl)-4-(4-chloro-3-(trifluoromethyl)phenyl)-4-oxo-2-phenylbutanal (**3na**):

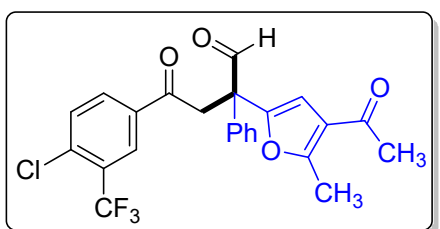

The title compound was prepared from **1n** (83.1 mg, 0.3 mmol) and **2a** (63.6 mg, 0.3 mmol) according to General procedure A. Purification using column chromatography ( $R_f = 0.50$ , SiO<sub>2</sub>, EtOAc:Hexane, 5:95) gave pure product as a brown sticky solid (77.6 mg, 56% yield). <sup>1</sup>H NMR (400 MHz, CDCl<sub>3</sub>)  $\delta$  10.04 (s, 1H), 8.22 (d,  $J = 1.2$  Hz, 1H), 8.03 (dd,  $J = 8.3, 1.6$  Hz, 1H), 7.61 (d,  $J = 8.3$  Hz, 1H), 7.36 (dt,  $J = 14.2, 6.9$  Hz, 3H), 7.20 (d,  $J = 7.1$  Hz, 2H), 6.66 (s, 1H), 4.09 (s, 2H), 2.52 (s, 3H), 2.41 (s, 3H). <sup>13</sup>C NMR (125 MHz, CDCl<sub>3</sub>)  $\delta$  195.7, 193.9, 193.8, 158.3, 150.0, 138.0, 137.1, 134.7, 132.3, 132.2, 129.3, 128.4, 127.7, 127.5, 122.6, 109.6, 57.6, 44.6, 29.3, 14.5. HRMS (ESI) calcd for C<sub>24</sub>H<sub>19</sub>ClF<sub>3</sub>O<sub>4</sub> [M+H]<sup>+</sup> 463.0924, found 463.0917.

#### 4-(3-(4-acetyl-5-methylfuran-2-yl)-4-oxo-3-phenylbutanoyl) benzonitrile (**3oa**):

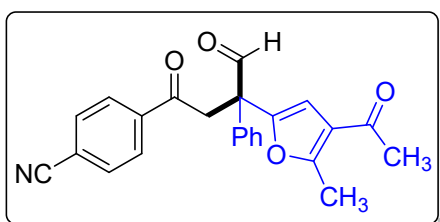

The title compound was prepared from **1o** (60 mg, 0.3 mmol) and **2a** (63.6 mg, 0.3 mmol) according to general procedure A. Purification using column chromatography ( $R_f = 0.40$ , SiO<sub>2</sub>, EtOAc:Hexane, 7:93) gave pure product as a pale brown sticky solid (67 mg, 58% yield). <sup>1</sup>H NMR (500 MHz, CDCl<sub>3</sub>)  $\delta$  10.04 (s, 1H), 8.01 (d,  $J = 8.4$  Hz, 2H), 7.76 (d,  $J = 8.4$  Hz, 2H), 7.38 (t,  $J = 7.4$  Hz, 2H), 7.33 (t,  $J = 7.2$  Hz, 1H), 7.19 (d,  $J = 7.3$  Hz, 2H), 6.64 (s, 1H), 4.10 (d,  $J = 2.6$  Hz, 2H), 2.52 (s, 3H), 2.41 (s, 3H). <sup>13</sup>C NMR (100 MHz, CDCl<sub>3</sub>)  $\delta$  195.7, 194.7, 193.9, 158.3, 150.0, 139.2, 137.2, 132.7, 129.3, 128.7, 128.4, 127.7, 122.6, 117.8, 116.9, 109.5, 57.6, 44.9, 29.3, 14.5. HRMS (ESI) calcd for C<sub>24</sub>H<sub>20</sub>NO<sub>4</sub> [M+H]<sup>+</sup> 386.1392, found 386.1381.

#### 2-(4-acetyl-5-methylfuran-2-yl)-4-(4-nitrophenyl)-4-oxo-2-phenylbutanal (**3pa**):

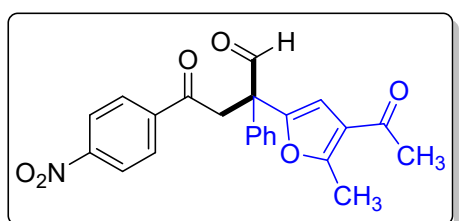

The title compound was prepared from **1p** (66 mg, 0.3 mmol) and **2a** (63.6 mg, 0.3 mmol) according to general procedure A. Purification using column chromatography ( $R_f = 0.30$ , SiO<sub>2</sub>, EtOAc:Hexane, 10:90) gave pure product as a brown sticky solid (72.9 mg, 60% yield). <sup>1</sup>H NMR (400 MHz, CDCl<sub>3</sub>)  $\delta$  10.05 (s, 1H),

8.29 (d,  $J = 8.5$  Hz, 2H), 8.08 (d,  $J = 8.6$  Hz, 2H), 7.36 (dt,  $J = 14.0, 6.9$  Hz, 3H), 7.20 (d,  $J = 7.2$  Hz, 2H), 6.66 (s, 1H), 4.14 (s, 2H), 2.52 (s, 3H), 2.41 (s, 3H).  $^{13}\text{C}$  NMR (100 MHz,  $\text{CDCl}_3$ )  $\delta$  195.6, 194.6, 193.9, 158.3, 150.6, 149.9, 140.7, 137.1, 129.3, 128.4, 127.7, 124.0, 122.6, 109.6, 57.7, 45.1, 29.3, 14.6. HRMS (ESI) calcd for  $\text{C}_{23}\text{H}_{20}\text{NO}_6$   $[\text{M}+\text{H}]^+$  406.1291, found 406.1283.

#### 2-(4-acetyl-5-methylfuran-2-yl)-4-oxo-2-phenyl-4-(thiophen-3-yl)butanal (3qa):

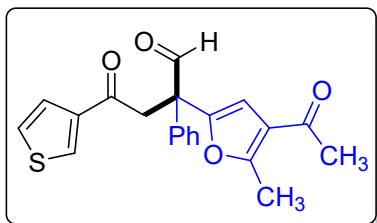

The title compound was prepared from **1q** (54.3 mg, 0.3 mmol) and **2a** (63.6 mg, 0.3 mmol) according to general procedure A. Purification using column chromatography ( $R_f = 0.50$ ,  $\text{SiO}_2$ , EtOAc:Hexane, 5:95) gave pure product as a dark brown colour sticky solid (65.8 mg, 65% yield).  $^1\text{H}$  NMR (400 MHz,  $\text{CDCl}_3$ )  $\delta$  10.03 (s, 1H), 7.74 (dd,  $J = 3.8, 1.0$  Hz, 1H), 7.65 (dd,  $J = 4.9, 1.0$  Hz, 1H), 7.40 – 7.34 (m, 2H), 7.32 (dd,  $J = 5.3, 1.8$  Hz, 1H), 7.24 – 7.20 (m, 2H), 7.12 (dd,  $J = 4.9, 3.9$  Hz, 1H), 6.66 (s, 1H), 4.06 (s, 2H), 2.50 (s, 3H), 2.39 (s, 3H).  $^{13}\text{C}$  NMR (100 MHz,  $\text{CDCl}_3$ )  $\delta$  195.9, 194.1, 188.9, 158.3, 150.3, 143.4, 137.3, 134.5, 132.5, 129.2, 128.3, 128.2, 127.8, 122.4, 109.7, 57.5, 45.3, 29.3, 14.5. HRMS (ESI) calcd for  $\text{C}_{21}\text{H}_{18}\text{NaO}_4\text{S}$   $[\text{M}+\text{H}]^+$  389.0823, found 389.0829.

#### 2-(4-acetyl-5-methylfuran-2-yl)-4-oxo-4-phenyl-2-(p-tolyl)butanal (3ab):

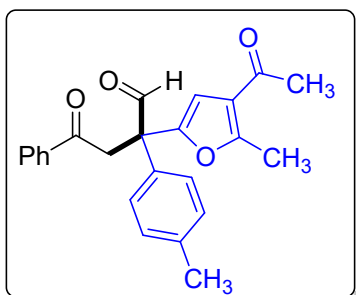

The title compound was prepared from **1a** (52.5 mg, 0.3 mmol) and **2b** (67.8 mg, 0.3 mmol) according to general procedure A. Purification using column chromatography ( $R_f = 0.50$ ,  $\text{SiO}_2$ , EtOAc:Hexane, 5:95) gave pure product as a yellow colour sticky solid (78.5 mg, 70% yield).  $^1\text{H}$  NMR (400 MHz,  $\text{CDCl}_3$ )  $\delta$  10.05 (s, 1H), 7.94 (d,  $J = 7.3$  Hz, 2H), 7.58 (t,  $J = 7.4$  Hz, 1H), 7.46 (t,  $J = 7.7$  Hz, 2H), 7.17 (d,  $J = 8.2$  Hz, 2H), 7.11 (d,  $J = 8.3$  Hz, 2H), 6.63 (s, 1H), 4.13 (d,  $J = 2.1$  Hz, 2H), 2.49 (s, 3H), 2.39 (s, 3H), 2.34 (s, 3H).  $^{13}\text{C}$  NMR (100 MHz,  $\text{CDCl}_3$ )  $\delta$  196.4, 196.1, 194.1, 158.1, 150.9, 138.0, 136.3, 134.4, 133.7, 129.8, 128.8, 128.3, 127.6, 122.4, 109.2, 57.0, 45.1, 29.3, 21.1, 14.5. HRMS (ESI) calcd for  $\text{C}_{24}\text{H}_{23}\text{O}_4$   $[\text{M}+\text{H}]^+$  375.1596, found 375.1588.

#### 2-(4-acetyl-5-methylfuran-2-yl)-2-(4-methoxyphenyl)-4-oxo-4-phenylbutanal (3ac):

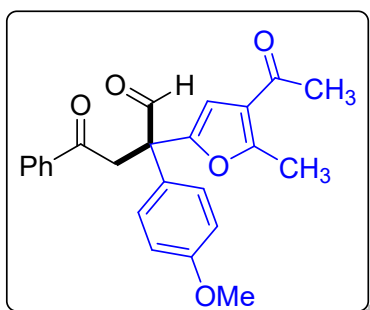

The title compound was prepared from **1a** (52.5 mg, 0.3 mmol) and **2c** (72.6 mg, 0.3 mmol) according to general procedure A. Purification using column chromatography ( $R_f = 0.4$ ,  $\text{SiO}_2$ , EtOAc:Hexane, 8:92) gave pure product as a sticky solid (80.7 mg, 69% yield).  $^1\text{H}$  NMR (400 MHz,  $\text{CDCl}_3$ )  $\delta$  10.02 (s, 1H), 7.94 (dd,  $J = 8.3, 1.2$  Hz, 2H), 7.61 – 7.54 (m, 1H), 7.45 (td,  $J = 7.6, 3.6$  Hz, 2H), 7.16 – 7.12 (m, 2H), 6.91 – 6.87 (m, 2H), 6.63 (s, 1H), 4.11 (d,  $J = 3.7$  Hz, 2H), 3.80 (s, 3H), 2.49 (s, 3H), 2.39 (s, 3H).  $^{13}\text{C}$  NMR (100 MHz,  $\text{CDCl}_3$ )  $\delta$  196.2, 196.2, 194.1, 159.4, 158.1, 150.9, 136.3, 133.7, 129.2, 129.0, 128.8, 128.3, 122.4, 114.5, 109.2, 56.7, 55.4, 45.1, 29.3, 14.5. HRMS (ESI) calcd for  $\text{C}_{24}\text{H}_{23}\text{O}_5$   $[\text{M}+\text{H}]^+$  391.1545, found 391.1537.

#### 2-(4-acetyl-5-methylfuran-2-yl)-2-(4-fluorophenyl)-4-oxo-4-phenylbutanal (3ad):

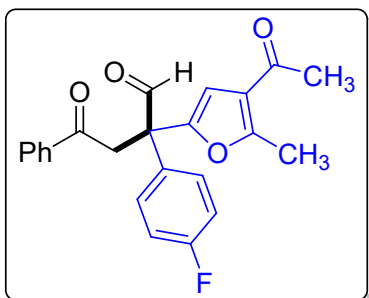

The title compound was prepared from **1a** (52.5 mg, 0.3 mmol) and **2d** (69 mg, 0.3 mmol) according to general procedure A. Purification using column chromatography ( $R_f = 0.50$ ,  $\text{SiO}_2$ , EtOAc:Hexane, 5:95) gave pure product as a pale brown sticky solid (77 mg, 68% yield).  $^1\text{H NMR}$  (400 MHz,  $\text{CDCl}_3$ )  $\delta$  10.06 (s, 1H), 7.98 – 7.91 (m, 2H), 7.59 (ddd,  $J = 6.9$ , 2.4, 1.2 Hz, 1H), 7.46 (dd,  $J = 10.6$ , 4.8 Hz, 2H), 7.24 – 7.17 (m, 2H), 7.05 (ddd,  $J = 12.2$ , 6.2, 2.7 Hz, 2H), 6.63 (s, 1H), 4.13 (d,  $J = 3.0$  Hz, 2H), 2.51 (s, 3H), 2.40 (s, 3H).  $^{13}\text{C NMR}$  (100 MHz,  $\text{CDCl}_3$ )  $\delta$  196.2,

195.9, 194.0, 163.6, 161.2, 158.4, 150.5, 136.1, 133.9, 133.4, 129.7, 129.6, 128.9, 128.3, 122.5, 116.1, 115.9, 109.5, 56.7, 45.5, 29.3, 14.5. HRMS (ESI) calcd for  $\text{C}_{23}\text{H}_{20}\text{FO}_4$   $[\text{M}+\text{H}]^+$  379.1346, found 379.1335.

#### 2-(4-acetyl-5-methylfuran-2-yl)-2-(4-chlorophenyl)-4-oxo-4-phenylbutanal (**3ae**):

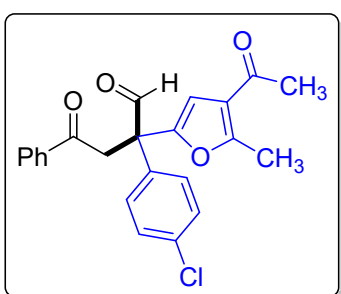

The title compound was prepared from **1a** (52.5 mg, 0.3 mmol) and **2e** (73.8 mg, 0.3 mmol) according to general procedure A. Purification using column chromatography ( $R_f = 0.50$ ,  $\text{SiO}_2$ , EtOAc:Hexane, 5:95) gave pure product as a pale brown sticky solid (78 mg, 66% yield).  $^1\text{H NMR}$  (400 MHz,  $\text{CDCl}_3$ )  $\delta$  10.08 (s, 1H), 7.96 (dt,  $J = 8.5$ , 1.6 Hz, 2H), 7.64 – 7.59 (m, 1H), 7.52 – 7.46 (m, 2H), 7.37 – 7.33 (m, 2H), 7.22 – 7.18 (m, 2H), 6.65 (s, 1H), 4.15 (d,  $J = 3.7$  Hz, 2H), 2.53 (s, 3H), 2.42 (s, 3H).  $^{13}\text{C NMR}$  (125 MHz,  $\text{CDCl}_3$ )  $\delta$

196.1, 195.8, 194.0, 158.5, 150.2, 136.2, 136.0, 134.2, 133.9, 129.3, 129.2, 128.9, 128.3, 122.5, 109.5, 56.8, 45.4, 29.3, 14.5. HRMS (ESI) calcd for  $\text{C}_{23}\text{H}_{20}\text{ClO}_4$   $[\text{M}+\text{H}]^+$  395.1050, found 395.1040.

#### 2-(4-acetyl-5-methylfuran-2-yl)-2-(4-bromophenyl)-4-oxo-4-phenylbutanal (**3af**):

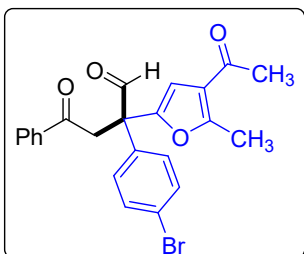

The title compound was prepared from **1a** (52.5 mg, 0.3 mmol) and **2f** (86.7 mg, 0.3 mmol) according to general procedure A. Purification using column chromatography ( $R_f = 0.50$ ,  $\text{SiO}_2$ , EtOAc:Hexane, 5:95) gave pure product as a brown colour sticky solid (84 mg, 64% yield).  $^1\text{H NMR}$  (400 MHz,  $\text{CDCl}_3$ )  $\delta$  10.06 (s, 1H), 8.14 – 7.65 (m, 2H), 7.60 (dd,  $J = 10.5$ , 4.3 Hz, 1H), 7.53 – 7.42 (m, 5H), 7.15 – 7.07 (m, 2H), 6.62 (s, 1H), 4.13 (d,  $J = 3.8$  Hz, 2H), 2.51 (s,

3H), 2.40 (s, 3H).  $^{13}\text{C NMR}$  (100 MHz,  $\text{CDCl}_3$ )  $\delta$  196.0, 195.8, 193.9, 158.5, 150.2, 136.8, 136.0, 133.9, 132.2, 129.6, 128.8, 128.3, 122.5, 122.4, 109.6, 56.8, 45.3, 29.3, 14.5. HRMS (ESI) calcd for  $\text{C}_{23}\text{H}_{20}\text{BrO}_4$   $[\text{M}+\text{H}]^+$  439.0545, found 439.0535.

#### 2-(4-acetyl-5-methylfuran-2-yl)-4-oxo-4-phenyl-2-(3-(trifluoromethyl) phenyl) butanal (**3ag**):

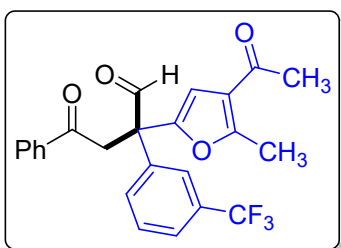

The title compound was prepared from **1a** (52.5 mg, 0.3 mmol) and **2g** (84 mg, 0.3 mmol) according to general procedure A. Purification using column chromatography ( $R_f = 0.5$ ,  $\text{SiO}_2$ , EtOAc:Hexane, 5:95) gave pure product as a brown colour sticky solid (79.6 mg, 62% yield).  $^1\text{H NMR}$  (500 MHz,  $\text{CDCl}_3$ )  $\delta$  10.10 (s, 1H), 7.93 (dd,  $J = 8.3$ , 1.1 Hz, 2H), 7.59 (dt,  $J = 15.4$ , 4.5 Hz, 2H), 7.46 (ddd,  $J = 22.8$ , 11.1, 5.3 Hz, 5H), 6.65 (s, 1H), 4.25 – 4.02 (m,

2H), 2.51 (s, 3H), 2.40 (s, 3H).  $^{13}\text{C NMR}$  (100 MHz,  $\text{CDCl}_3$ )  $\delta$  196.0, 195.7, 193.9, 158.7, 149.9, 139.0, 136.0,

134.0, 131.5, 129.6, 128.9, 128.3, 125.1, 125.0, 124.6, 124.6, 122.6, 109.8, 57.1, 45.6, 29.3, 14.5. **HRMS (ESI)** calcd for C<sub>24</sub>H<sub>20</sub>F<sub>3</sub>O<sub>4</sub> [M+H]<sup>+</sup> 429.1314, found 429.1313.

**Methyl 4-(2-(4-acetyl-5-methylfuran-2-yl)-1,4-dioxo-4-phenylbutan-2-yl) benzoate (3ah):**

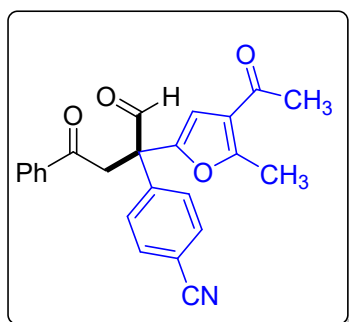

The title compound was prepared from **1a** (52.5 mg, 0.3 mmol) and **2h** (71.1 mg, 0.3 mmol) according to general procedure A. Purification using column chromatography ( $R_f = 0.3$ , SiO<sub>2</sub>, EtOAc:Hexane, 12:88) gave pure product as a brown sticky solid (70.4 mg, 61% yield). **<sup>1</sup>H NMR (400 MHz, CDCl<sub>3</sub>)**  $\delta$  10.09 (s, 1H), 7.93 (dd,  $J = 8.3, 1.1$  Hz, 2H), 7.67 – 7.63 (m, 2H), 7.60 (dd,  $J = 4.9, 3.7$  Hz, 1H), 7.48 (dd,  $J = 10.7, 4.8$  Hz, 2H), 7.40 – 7.36 (m, 2H), 6.64 (s, 1H), 4.17 (d,  $J = 2.3$  Hz, 2H), 2.53 (s, 3H), 2.41 (s, 3H). **<sup>13</sup>C NMR (125 MHz, CDCl<sub>3</sub>)**  $\delta$  195.6, 195.5, 193.7, 158.9, 149.5, 143.8, 143.2, 142.3, 135.7, 134.1, 132.7, 129.0, 128.8, 128.3, 122.6, 118.4, 112.1, 109.9, 57.2, 45.6, 29.3, 14.6. **HRMS (ESI)** calcd for C<sub>24</sub>H<sub>20</sub>NO<sub>4</sub> [M+H]<sup>+</sup> 386.1392, found 386.1385.

**2-(4-acetyl-5-methylfuran-2-yl)-2-(4-nitrophenyl)-4-oxo-4-phenylbutanal (3ai):**

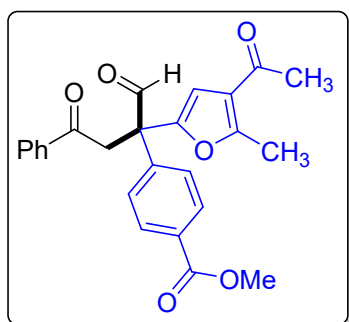

The title compound was prepared from **1a** (52.5 mg, 0.3 mmol) and **2i** (81 mg, 0.3 mmol) according to general procedure A. Purification using column chromatography ( $R_f = 0.30$ , SiO<sub>2</sub>, EtOAc:Hexane, 10:90) gave pure product as a pale brown sticky solid (75.2 mg, 60% yield). **<sup>1</sup>H NMR (400 MHz, CDCl<sub>3</sub>)**  $\delta$  10.11 (s, 1H), 8.04 – 7.99 (m, 2H), 7.97 – 7.89 (m, 2H), 7.63 – 7.56 (m, 1H), 7.47 (dd,  $J = 10.7, 4.8$  Hz, 2H), 7.36 – 7.30 (m, 2H), 6.63 (s, 1H), 4.18 (d,  $J = 1.8$  Hz, 2H), 3.91 (s, 3H), 2.51 (s, 3H), 2.40 (s, 3H). **<sup>13</sup>C NMR (125 MHz, CDCl<sub>3</sub>)**  $\delta$  196.1, 195.7, 193.9, 166.6, 158.5, 150.2, 142.8, 136.0, 133.9, 130.2, 129.9, 128.9, 128.3, 127.9, 122.5, 109.6, 52.4, 45.4, 29.3, 14.5. **HRMS (ESI)** calcd for C<sub>25</sub>H<sub>23</sub>O<sub>6</sub> [M+H]<sup>+</sup> 419.1495, found 419.1479.

**2-(4-acetyl-5-methylfuran-2-yl)-2-(4-nitrophenyl)-4-oxo-4-phenylbutanal (3aj):**

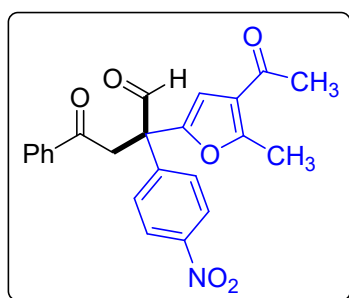

The title compound was prepared from **1a** (52.5 mg, 0.3 mmol) and **2j** (77.1 mg, 0.3 mmol) according to general procedure A. Purification using column chromatography ( $R_f = 0.3$ , SiO<sub>2</sub>, EtOAc:Hexane, 15:85) gave pure product as a yellow colour sticky solid (72.9 mg, 60% yield). **<sup>1</sup>H NMR (400 MHz, CDCl<sub>3</sub>)**  $\delta$  10.11 (s, 1H), 8.20 (d,  $J = 8.9$  Hz, 2H), 7.98 – 7.89 (m, 2H), 7.61 (d,  $J = 7.4$  Hz, 1H), 7.47 (dd,  $J = 15.0, 8.3$  Hz, 4H), 6.65 (s, 1H), 4.20 (d,  $J = 1.9$  Hz, 2H), 2.53 (s, 3H), 2.41 (s, 3H). **<sup>13</sup>C NMR (100 MHz, CDCl<sub>3</sub>)**  $\delta$  195.5, 195.4, 193.7, 159.0, 149.5, 147.5, 145.2, 135.7, 134.2, 129.1, 129.0, 128.4, 124.0, 122.7, 110.0, 57.2, 45.7, 29.3, 14.6. **HRMS (ESI)** calcd for C<sub>23</sub>H<sub>20</sub>NO<sub>6</sub> [M+H]<sup>+</sup> 406.1291, found 406.1282.

**2-(4-acetyl-5-methylfuran-2-yl)-2-(2,3-dimethylphenyl)-4-oxo-4-phenylbutanal (3ak):**

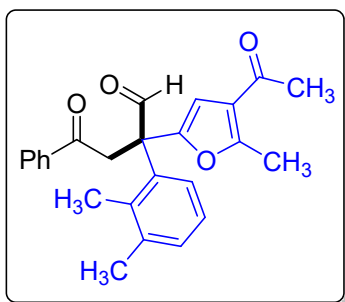

The title compound mixture was prepared from **1a** (52.5 mg, 0.3 mmol) and **2k** (72 mg, 0.3 mmol) according to general procedure **A**. Purification using column chromatography ( $R_f = 0.50$ ,  $\text{SiO}_2$ , EtOAc:Hexane, 5:95) gave pure product as a sticky pale yellow sticky solid (80.3 mg, 69% yield).  $^1\text{H NMR}$  (500 MHz,  $\text{CDCl}_3$ )  $\delta$  10.04 (s, 1H), 7.99 – 7.90 (m, 2H), 7.58 (t,  $J = 7.4$  Hz, 1H), 7.46 (t,  $J = 7.7$  Hz, 2H), 7.12 (d,  $J = 7.9$  Hz, 1H), 6.98 (d,  $J = 1.6$  Hz, 1H), 6.93 (dd,  $J = 7.9, 1.9$  Hz, 1H), 6.64 (s, 1H), 4.12 (d,  $J = 6.3$  Hz, 2H), 2.49 (s, 3H), 2.39 (s, 3H), 2.24 (s, 6H).  $^{13}\text{C NMR}$  (100 MHz,  $\text{CDCl}_3$ )  $\delta$  196.4, 196.2, 194.2, 158.0, 151.0, 137.5, 136.8, 136.4, 134.8, 133.7, 130.4, 128.8, 128.3, 125.1, 122.4, 109.2, 57.0, 45.0, 29.3, 20.2, 19.5, 14.5. **HRMS (ESI)** calcd for  $\text{C}_{25}\text{H}_{25}\text{O}_4$   $[\text{M}+\text{H}]^+$  389.1753, found 389.1741.

#### General procedure-B for the synthesis of 2-ester polysubstituted 1H-pyrrole (**5**)

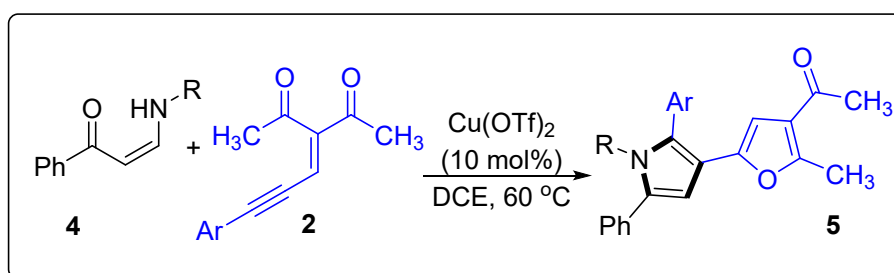

A mixture of ynynone **2** (69 mg, 0.3 mmol) and  $\text{Cu}(\text{OTf})_2$  (10.8 mg, 0.1 mmol) in DCE (5 mL) was stirred at 60 °C for 1 min, and enaminone **4** (66.9 mg, 0.3 mmol) was added slowly at 60 °C. The reaction was monitored by TLC to ensure its completion. The reaction mixture was cooled to ambient temperature and evaporated all the volatiles under reduced pressure. The resultant residue was purified by silica gel column chromatography (eluent: EtOAc:Hexane = 5:95, v/v), affording **5** (78.3 mg, 60%) as a pale yellow solid.

#### 1-(5-(2-(4-fluorophenyl)-1,5-diphenyl-1H-pyrrol-3-yl)-2-methylfuran-3-yl)ethan-1-one (**5a**):

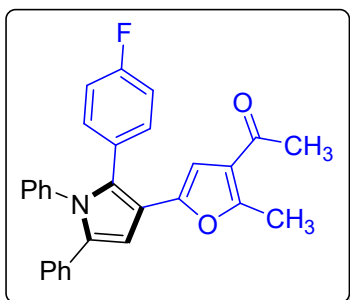

The title compound was prepared from **4** (66.9 mg, 0.3 mmol) and **2d** (69 mg, 0.3 mmol) according to general procedure **B**. Purification using column chromatography ( $R_f = 0.50$ ,  $\text{SiO}_2$ , EtOAc:Hexane, 5:95) gave pure product as a pale yellow solid (78.3 mg, 60% yield), mp 136-138 °C.  $^1\text{H NMR}$  (400 MHz,  $\text{CDCl}_3$ )  $\delta$  7.31 (dd,  $J = 8.9, 5.4$  Hz, 2H), 7.26 – 7.24 (m, 2H), 7.23 (s, 2H), 7.16 (dd,  $J = 3.4, 1.4$  Hz, 2H), 7.13 – 7.12 (m, 2H), 7.11 (dd,  $J = 3.4, 1.3$  Hz, 2H), 6.98 (t,  $J = 8.8$  Hz, 2H), 6.59 (s, 1H), 6.09 (s, 1H), 2.40 (s, 3H), 2.20 (s, 3H).  $^{13}\text{C NMR}$  (125 MHz,  $\text{CDCl}_3$ )  $\delta$  194.2, 162.8, 160.8, 158.2, 143.7, 138.8, 136.7, 132.3, 131.6, 129.5, 129.5, 128.8, 128.7, 128.6, 128.2, 128.0, 127.0, 126.3, 122.5, 121.4, 29.2, 14.4. **HRMS (ESI)** calcd for  $\text{C}_{29}\text{H}_{23}\text{FNO}_2$   $[\text{M}+\text{H}]^+$  436.1713, found 436.1741.

#### 1-(5-(2-(4-bromophenyl)-1,5-diphenyl-1H-pyrrol-3-yl)-2-methylfuran-3-yl)ethan-1-one (**5b**):

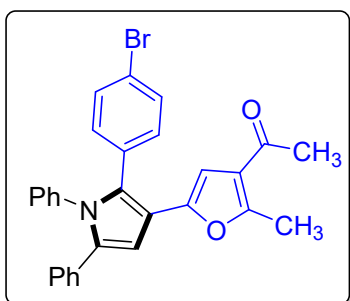

The title compound was prepared from **4** (66.9 mg, 0.3 mmol) and **2f** (86.7 mg, 0.3 mmol) according to general procedure **B**. Purification using column chromatography ( $R_f = 0.50$ ,  $\text{SiO}_2$ , EtOAc:Hexane, 5:95) gave pure product as a pale yellow solid (90.5 mg, 61% yield), mp 142-144 °C.  $^1\text{H NMR}$  (400

**MHz, CDCl<sub>3</sub>**)  $\delta$  7.45 – 7.43 (m, 1H), 7.43 – 7.41 (m, 1H), 7.28 (dd,  $J$  = 5.0, 1.9 Hz, 3H), 7.26 – 7.23 (m, 2H), 7.21 – 7.17 (m, 3H), 7.16 – 7.12 (m, 4H), 6.63 (s, 1H), 6.14 (s, 1H), 2.44 (s, 3H), 2.24 (s, 3H). **<sup>13</sup>C NMR (100 MHz, CDCl<sub>3</sub>)**  $\delta$  194.1, 158.3, 143.5, 138.7, 136.9, 134.5, 132.2, 131.5, 129.5, 128.8, 128.7, 128.6, 128.2, 128.0, 127.1, 126.0, 122.5, 121.5, 120.3, 112.2, 109.7, 29.2, 14.4. **HRMS (ESI)** calcd for C<sub>29</sub>H<sub>23</sub>BrNO<sub>2</sub> [M+H]<sup>+</sup> 496.0912, found 496.0915.

#### 4-(3-(4-acetyl-5-methylfuran-2-yl)-1,5-diphenyl-1H-pyrrol-2-yl) benzonitrile (5c):

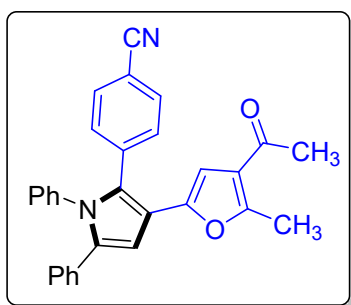

The title compound was prepared from **4** (66.9 mg, 0.3 mmol) and **2h** (132.6 mg, 0.3 mmol) according to general procedure **B**. Purification using column chromatography ( $R_f$  = 0.50, SiO<sub>2</sub>, EtOAc:Hexane, 5:95) gave pure product as a pale yellow solid (79.5 mg, 60% yield), mp 150-152 °C. **<sup>1</sup>H NMR (500 MHz, CDCl<sub>3</sub>)**  $\delta$  7.58 – 7.53 (m, 2H), 7.43 – 7.38 (m, 2H), 7.26 – 7.24 (m, 2H), 7.22 (s, 1H), 7.18 – 7.14 (m, 3H), 7.12 – 7.07 (m, 4H), 6.63 (s, 1H), 6.11 (s, 1H), 2.41 (s, 3H), 2.20 (s, 3H). **<sup>13</sup>C NMR (100 MHz, CDCl<sub>3</sub>)**  $\delta$  193.9, 158.5, 143.0, 140.4, 138.3, 137.4, 132.2, 131.9, 128.9, 128.6, 128.3, 128.2, 127.3, 125.2, 122.6, 122.3, 119.4, 112.5, 109.6, 109.5, 29.1, 14.4. **HRMS (ESI)** calcd for C<sub>30</sub>H<sub>23</sub>N<sub>2</sub>O<sub>2</sub> [M+H]<sup>+</sup> 443.1760, found 443.1748.

#### 1-(5-(2-(2,3-dimethylphenyl)-1,5-diphenyl-1H-pyrrol-3-yl)-2-methylfuran-3-yl)ethan-1-one (5d):

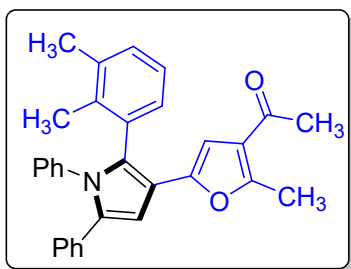

The title compound was prepared from **4** (66.9 mg, 0.3 mmol) and **2j** (72 mg, 0.3 mmol) according to general procedure **B**. Purification using column chromatography ( $R_f$  = 0.50, SiO<sub>2</sub>, EtOAc:Hexane, 5:95) gave pure product as a pale yellow solid (89.4 mg, 67% yield), mp 140-142 °C. **<sup>1</sup>H NMR (500 MHz, CDCl<sub>3</sub>)**  $\delta$  7.26 (s, 1H), 7.19 – 7.14 (m, 6H), 7.11 (dd,  $J$  = 7.9, 1.6 Hz, 2H), 6.97 (dd,  $J$  = 7.1, 5.2 Hz, 4H), 6.88 (dd,  $J$  = 6.4, 5.0 Hz, 1H), 6.76 (s, 1H), 6.07 (s, 1H), 2.57 (s, 3H), 2.27 (s, 3H), 2.22 (s, 3H), 2.14 (s, 3H). **<sup>13</sup>C NMR (100 MHz, CDCl<sub>3</sub>)**  $\delta$  208.2, 136.0, 134.9, 132.5, 129.3, 129.0, 128.6, 128.1, 127.3, 126.6, 122.8, 113.5, 107.8, 103.8, 29.2, 19.7, 14.5. **HRMS (ESI)** calcd for C<sub>31</sub>H<sub>28</sub>NO<sub>2</sub> [M+H]<sup>+</sup> 446.2120, found 446.2102.

#### 1-(5-(1-benzyl-2-(4-fluorophenyl)-5-phenyl-1H-pyrrol-3-yl)-2-methylfuran-3-yl)ethan-1-one (5e):

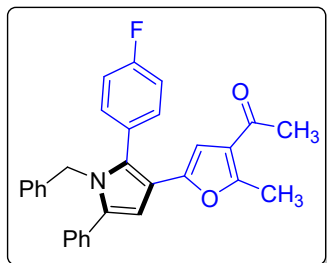

The title compound was prepared from **4** (71.1 mg, 0.3 mmol) and **2d** (69 mg, 0.5 mmol) according to general procedure **B**. Purification using column chromatography ( $R_f$  = 0.50, SiO<sub>2</sub>, EtOAc:Hexane, 5:95) gave pure product as a white colour solid (78.1 mg, 58% yield), mp 145-147 °C. **<sup>1</sup>H NMR (400 MHz, CDCl<sub>3</sub>)**  $\delta$  7.36 – 7.31 (m, 3H), 7.30 (d,  $J$  = 1.8 Hz, 1H), 7.28 (dd,  $J$  = 3.5, 1.7 Hz, 1H), 7.22 (dddd,  $J$  = 7.7, 4.3, 2.4, 1.8 Hz, 3H), 7.18 – 7.14 (m, 2H), 6.94 – 6.88 (m, 2H), 6.83 – 6.79 (m, 2H), 6.44 (s, 1H), 6.18 (s, 1H), 5.09 (s, 2H), 2.42 (s, 3H), 2.18 (s, 3H). **<sup>13</sup>C NMR (125 MHz, CDCl<sub>3</sub>)**  $\delta$  194.2, 162.6, 160.7, 158.5, 143.8, 139.0, 137.5, 132.7, 131.7, 129.2, 129.1, 128.7, 128.6, 127.9, 127.2, 126.3, 126.0, 122.5, 120.1, 115.3, 115.2, 112.2, 109.5, 49.2, 29.2, 14.5. **HRMS (ESI)** calcd for C<sub>30</sub>H<sub>25</sub>FNO<sub>2</sub> [M+H]<sup>+</sup> 450.1869, found 450.1860.

### 1-(5-(1-benzyl-2-(4-bromophenyl)-5-phenyl-1H-pyrrol-3-yl)-2-methylfuran-3-yl)ethan-1-one (5f):

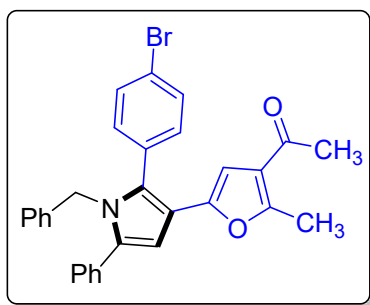

The title compound was prepared from **4** (71.1 mg, 0.3 mmol) and **2f** (86.7 mg, 0.3 mmol) according to general procedure **B**. Purification using column chromatography ( $R_f = 0.50$ , SiO<sub>2</sub>, EtOAc:Hexane, 5:95) gave pure product as a white colour solid (91.6 mg, 60% yield), mp 148-150 °C. <sup>1</sup>H NMR (400 MHz, CDCl<sub>3</sub>) δ 7.41 – 7.37 (m, 4H), 7.34 (dt,  $J = 6.6, 4.2$  Hz, 3H), 7.23 (s, 1H), 7.20 (dt,  $J = 4.6, 3.2$  Hz, 4H), 6.86 (d,  $J = 6.7$  Hz, 2H), 6.51 (s, 1H), 6.26 (s, 1H), 5.14 (s, 2H), 2.48 (s, 3H), 2.25 (s, 3H). <sup>13</sup>C NMR (75 MHz, CDCl<sub>3</sub>) δ 194.1, 158.7, 143.6, 138.9, 137.6, 134.6, 132.6, 131.5, 129.1, 128.7, 128.6, 127.9, 127.2, 126.0, 122.5, 120.2, 120.0, 112.4, 109.3, 49.2, 29.2, 14.5. HRMS (ESI) calcd for C<sub>30</sub>H<sub>25</sub>BrNO<sub>2</sub> [M+H]<sup>+</sup> 510.1069, found 510.1093.

### 1-(5-(1-benzyl-2-(4-nitrophenyl)-5-phenyl-1H-pyrrol-3-yl)-2-methylfuran-3-yl)ethan-1-one (5g):

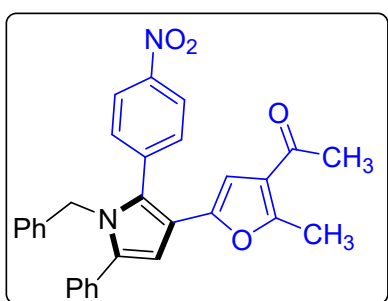

The title compound was prepared from **4** (71.1 mg, 0.3 mmol) and **2j** (77.1 mg, 0.3 mmol) according to general procedure **B**. Purification using column chromatography ( $R_f = 0.50$ , SiO<sub>2</sub>, EtOAc:Hexane, 5:95) gave pure product as a white colour solid (78.5 mg, 55% yield), mp 155-157 °C. <sup>1</sup>H NMR (400 MHz, CDCl<sub>3</sub>) δ 8.17 – 8.04 (m, 2H), 7.46 – 7.43 (m, 1H), 7.42 (t,  $J = 2.2$  Hz, 1H), 7.38 (qd,  $J = 6.4, 2.9$  Hz, 5H), 7.25 (s, 1H), 7.24 – 7.19 (m, 2H), 6.90 – 6.81 (m, 2H), 6.60 (s, 1H), 6.31 (s, 1H), 5.15 (s, 2H), 2.50 (s, 3H), 2.26 (s, 3H). <sup>13</sup>C NMR (100 MHz, CDCl<sub>3</sub>) δ 193.9, 159.0, 145.9, 145.1, 143.0, 142.6, 138.5, 138.2, 132.2, 129.2, 128.8, 128.7, 128.3, 127.6, 127.4, 126.0, 124.9, 123.9, 122.7, 121.5, 112.9, 109.4, 49.3, 29.2, 14.5. HRMS (ESI) calcd for C<sub>30</sub>H<sub>25</sub>N<sub>2</sub>O<sub>4</sub> [M+H]<sup>+</sup> 477.1814, found 477.1861.

### General procedure for the synthesis of **6**:

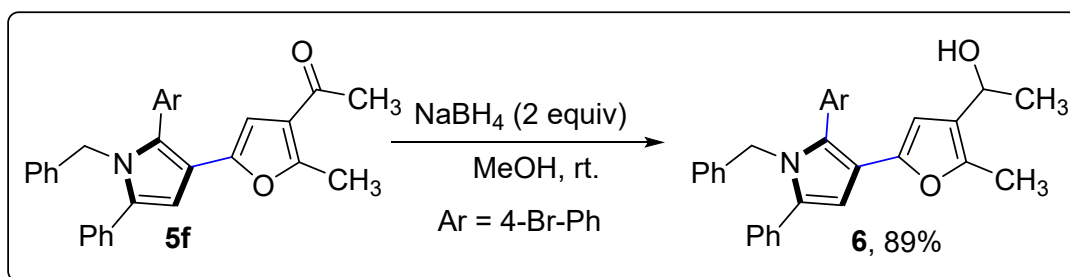

To a solution of **5f** (0.20 mmol, 102 mg) in MeOH (2 mL) was added NaBH<sub>4</sub> (0.40 mmol, 15.12 mg) at room temperature and the reaction mixture was stirred at the same temperature for 30 min under nitrogen atmosphere. The mixture was poured into H<sub>2</sub>O (5 mL) and extracted with EtOAc (10 mL). The organic layer was washed with brine (10 mL) and dried with Na<sub>2</sub>SO<sub>4</sub>. After removal of the solvent, the residue was subjected to column chromatography to get **6** as brown color sticky solid (56.3 mg, 55% yield), ( $R_f = 0.4$ , SiO<sub>2</sub> EtOAc:Hexane, 10:90).

**1-(5-(1-benzyl-2-(4-bromophenyl)-5-phenyl-1H-pyrrol-3-yl)-2-methylfuran-3-yl)ethan-1-ol (6): <sup>1</sup>H NMR**

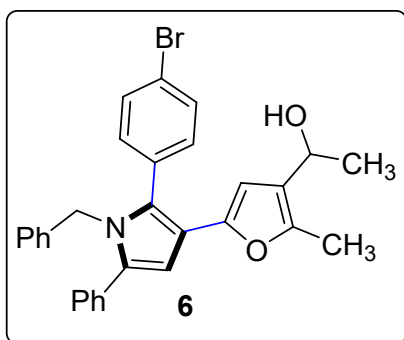

**(500 MHz, CDCl<sub>3</sub>)** δ 7.38 (t, *J* = 2.0 Hz, 2H), 7.36 (dd, *J* = 4.0, 1.5 Hz, 3H), 7.34 (d, *J* = 1.7 Hz, 1H), 7.33 – 7.31 (m, 1H), 7.26 (s, 1H), 7.22 (d, *J* = 1.9 Hz, 1H), 7.20 (d, *J* = 1.8 Hz, 2H), 7.19 (t, *J* = 1.9 Hz, 1H), 6.85 (d, *J* = 6.7 Hz, 2H), 6.49 (s, 1H), 6.04 (s, 1H), 5.14 (s, 2H), 4.74 (q, *J* = 6.4 Hz, 1H), 2.21 (s, 3H), 1.32 (d, *J* = 6.4 Hz, 3H). **<sup>13</sup>C NMR (100 MHz, CDCl<sub>3</sub>)** δ 148.0, 143.4, 139.1, 137.1, 135.0, 132.9, 131.3, 129.2, 128.6, 128.5, 128.4, 127.7, 127.0, 126.9, 126.2, 125.1, 121.8, 119.7, 110.9, 109.2, 62.8, 49.2, 24.0, 12.0. **HRMS (ESI)** calcd for C<sub>30</sub>H<sub>25</sub>BrNO [M-OH] 494.1120, found 494.1109.

**General Procedure for the Preparation of Oxime Ether 7:**

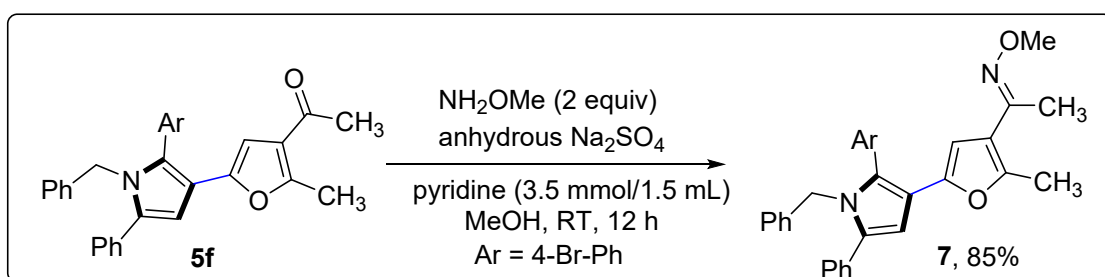

Compound **5f** (0.2 mmol, 102 mg), methoxylamine hydrochloride (0.4 mmol, 2.0 equiv, 33.2 mg), anhydrous Na<sub>2</sub>SO<sub>4</sub> (4 mmol, 2.0 equiv, 56.8 mg), pyridine (.2 mmol, 1.0 equiv, .016 ml), and methanol (2 ml) were added to a 10 ml round-bottom flask. The reaction mixture was stirred at room temperature overnight. The mixture was diluted with saturated NH<sub>4</sub>Cl solution (25 mL) and extracted with EtOAc (3 × 25 mL). The organic layers were combined, washed with brine, and dried over anhydrous MgSO<sub>4</sub>. The solvent was removed under vacuum, and the residue was purified by flash column chromatography (R<sub>f</sub> = 0.8, SiO<sub>2</sub> EtOAc:Hexane, 2:98) as the eluent to give the desired product **7** (51.8 mg, 85% yield).

**(E)-1-(5-(1-benzyl-2-(4-bromophenyl)-5-phenyl-1H-pyrrol-3-yl)-2-methylfuran-3-yl)ethan-1-one O-methyl oxime (7): <sup>1</sup>H NMR (400 MHz, CDCl<sub>3</sub>)**

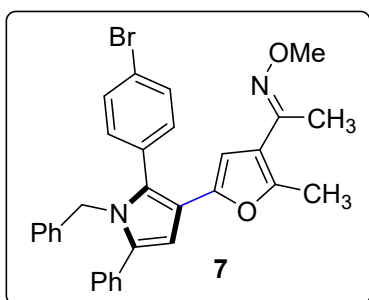

**(400 MHz, CDCl<sub>3</sub>)** δ 7.44 – 7.38 (m, 5H), 7.38 – 7.31 (m, 3H), 7.28 – 7.19 (m, 4H), 6.93 – 6.78 (m, 2H), 6.53 (s, 1H), 6.16 (s, 1H), 5.17 (s, 2H), 3.94 (s, 3H), 2.42 (s, 3H), 2.00 (s, 3H). **<sup>13</sup>C NMR (100 MHz, CDCl<sub>3</sub>)** δ 150.8, 150.3, 143.3, 139.1, 137.2, 134.8, 132.9, 131.4, 129.1, 128.6, 128.5, 127.8, 127.1, 126.1, 125.3, 112.0, 109.3, 61.8, 49.1, 14.2, 14.1. **HRMS (ESI)** calcd for C<sub>31</sub>H<sub>28</sub>BrN<sub>2</sub>O<sub>2</sub> [M+H]<sup>+</sup> 539.1334, found 539.1326.



## 5. X-ray crystallography data

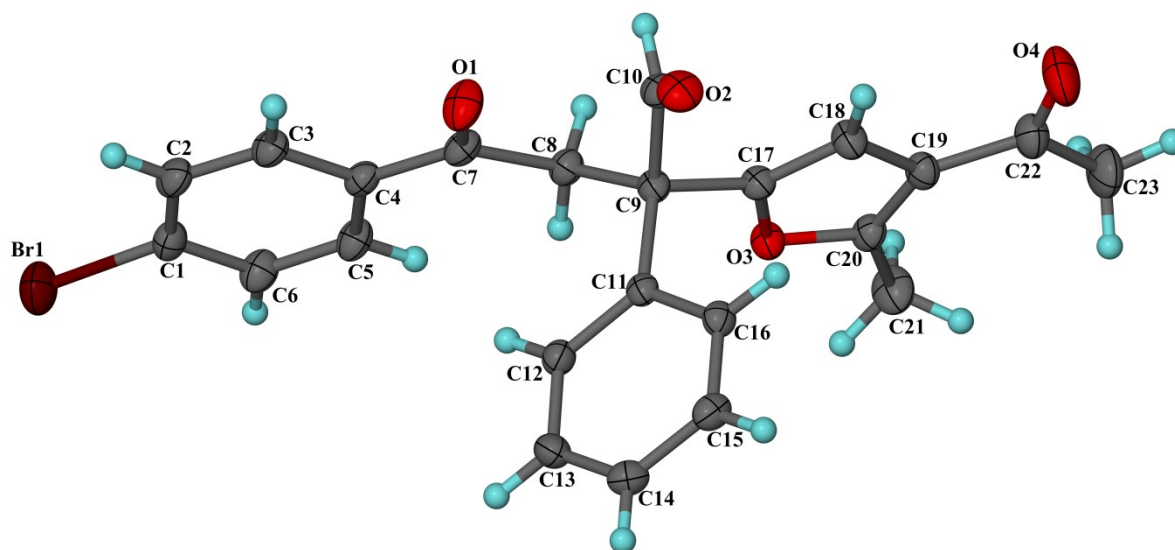

**Sample Preparation for Crystal Growth:** The compound **3ha** was dissolved in  $\text{CDCl}_3$  in beaker and kept for slow evaporation at room temperature. Formation of needle shape crystals was observed after seven days. The single crystals were then subjected to X-ray diffraction analysis.

Figure caption: ORTEP diagram of KB187 compound with the atom-numbering. Displacement ellipsoids are drawn at the 35% probability level and H atoms are shown as small spheres of arbitrary radius. **CCDC deposition number 2164031** contains the supplementary crystallographic data for this paper which can be obtained free of charge at <https://www.ccdc.cam.ac.uk/structures/>

**Crystal data for KB187:**  $\text{C}_{23}\text{H}_{19}\text{O}_2\text{Br}_1$ ,  $M = 439.29$ , Monoclinic, Space group  $P2_1/n$  (No. 14),  $a = 11.9543(16)\text{\AA}$ ,  $b = 13.1009(16)\text{\AA}$ ,  $c = 12.3965(14)\text{\AA}$ ,  $\alpha = 90^\circ$ ,  $\beta = 98.422(3)^\circ$ ,  $\gamma = 90^\circ$ ,  $V = 1920.5(4)\text{\AA}^3$ ,  $Z = 4$ ,  $D_c = 1.519\text{ g/cm}^3$ ,  $F_{000} = 896$ , Bruker D8 QUEST PHOTON-III-C7 detector, Mo-K $\alpha$  radiation,  $\lambda = 0.71073\text{ \AA}$ ,  $T = 293(2)\text{K}$ ,  $2\theta_{\text{max}} = 56^\circ$ ,  $\mu = 2.167\text{ mm}^{-1}$ , 29016 reflections collected, 4708 unique ( $R_{\text{int}} = 0.0521$ ), 255 parameters,  $R1 = 0.0389$ ,  $wR2 = 0.0939$ ,  $R$  indices based on 3349 reflections with  $I > 2\sigma(I)$  (refinement on  $F^2$ ), Final  $\text{Goof} = 1.026$ , largest difference hole and peak =  $-0.530$  and  $0.382\text{ e.\AA}^{-3}$ .

### Data collection and Structure solution details:

X-ray data for the compound were collected at room temperature on a Bruker D8 QUEST instrument with an  $\text{I}\mu\text{S}$  Mo microsource ( $\lambda = 0.7107\text{ \AA}$ ) and a PHOTON-100 detector. The raw data frames were reduced and corrected for absorption effects using the Bruker Apex 3 software suite programs [1]. The structure was solved using intrinsic phasing method [2] and further refined with the SHELXL [2-3] program and expanded using Fourier techniques. Anisotropic displacement parameters were included for all non-hydrogen atoms. All C bound H atoms were positioned geometrically and treated as riding on their parent C atoms [C-H =

0.93-0.97 Å, and  $U_{iso}(H) = 1.5U_{eq}(C)$  for methyl H or  $1.2U_{eq}(C)$  for other H atoms].  
**CCDC deposition number 2164031** contains the supplementary crystallographic data for this paper which can be obtained free of charge at <https://www.ccdc.cam.ac.uk/structures/>

1. Bruker (2016). APEX3, SAINT and SADABS. Bruker AXS, Inc., Madison, Wisconsin, USA.
2. Sheldrick G. M. (2015). *Acta Crystallogr C* 71: 3-8.
3. Muller, P, Herbst-Imer, R, Spek, A. L, Schneider, T. R, and Sawaya, M. R. *Crystal Structure Refinement: A Crystallographer's Guide to SHELXL*. Muller, P. Ed. 2006 Oxford University Press: Oxford, New York, pp. 57–91.

## checkCIF/PLATON report

Structure factors have been supplied for datablock(s) KB187\_0m

THIS REPORT IS FOR GUIDANCE ONLY. IF USED AS PART OF A REVIEW PROCEDURE FOR PUBLICATION, IT SHOULD NOT REPLACE THE EXPERTISE OF AN EXPERIENCED CRYSTALLOGRAPHIC REFEREE.

No syntax errors found. CIF dictionary Interpreting this report

### Datablock: KB187\_0m

---

Bond precision: C-C = 0.0030 A Wavelength=0.71073  
Cell: a=11.9543(16) b=13.1009(16) c=12.3965(14)  
alpha=90 beta=98.422(3) gamma=90  
Temperature: 293 K

|                | Calculated    | Reported      |
|----------------|---------------|---------------|
| Volume         | 1920.5(4)     | 1920.5(4)     |
| Space group    | P 21/n        | P 21/n        |
| Hall group     | -P 2yn        | -P 2yn        |
| Moiety formula | C23 H19 Br O4 | C23 H19 Br O4 |
| Sum formula    | C23 H19 Br O4 | C23 H19 Br O4 |
| Mr             | 439.28        | 439.29        |
| Dx, g cm-3     | 1.519         | 1.519         |
| Z              | 4             | 4             |
| Mu (mm-1)      | 2.167         | 2.167         |
| F000           | 896.0         | 896.0         |
| F000'          | 895.26        |               |
| h, k, lmax     | 15, 17, 16    | 15, 17, 16    |
| Nref           | 4784          | 4708          |
| Tmin, Tmax     | 0.551, 0.634  | 0.612, 0.746  |
| Tmin'          | 0.540         |               |

Correction method= # Reported T Limits: Tmin=0.612 Tmax=0.746  
AbsCorr = MULTI-SCAN

Data completeness= 0.984 Theta(max)= 28.317

R(reflections)= 0.0389( 3349) wR2(reflections)=  
0.1072( 4708)  
S = 1.026 Npar= 255

---

The following ALERTS were generated. Each ALERT has the format  
**test-name\_ALERT\_alert-type\_alert-level**.  
Click on the hyperlinks for more details of the test.

---

**Alert level C**

|                   |                                                  |        |        |
|-------------------|--------------------------------------------------|--------|--------|
| PLAT905_ALERT_3_C | Negative K value in the Analysis of Variance ... | -0.879 | Report |
| PLAT911_ALERT_3_C | Missing FCF Refl Between Thmin & STh/L= 0.600    | 74     | Report |
| PLAT913_ALERT_3_C | Missing # of Very Strong Reflections in FCF .... | 19     | Note   |

---

**Alert level G**

|                   |                                                  |        |        |
|-------------------|--------------------------------------------------|--------|--------|
| PLAT019_ALERT_1_G | _diffn_measured_fraction_theta_full/*_max < 1.0  | 0.994  | Report |
| PLAT199_ALERT_1_G | Reported _cell_measurement_temperature ..... (K) | 293    | Check  |
| PLAT200_ALERT_1_G | Reported _diffn_ambient_temperature ..... (K)    | 293    | Check  |
| PLAT380_ALERT_4_G | Incorrectly? Oriented X(sp2)-Methyl Moiety ..... | C23    | Check  |
| PLAT398_ALERT_2_G | Deviating C-O-C Angle From 120 for O3 .          | 107.3  | Degree |
| PLAT793_ALERT_4_G | Model has Chirality at C9 (Centro SPGR)          | R      | Verify |
| PLAT883_ALERT_1_G | No Info/Value for _atom_sites_solution_primary . | Please | Do !   |
| PLAT910_ALERT_3_G | Missing # of FCF Reflection(s) Below Theta(Min). | 1      | Note   |
| PLAT912_ALERT_4_G | Missing # of FCF Reflections Above STh/L= 0.600  | 1      | Note   |
| PLAT933_ALERT_2_G | Number of HKL-OMIT Records in Embedded .res File | 7      | Note   |
| PLAT978_ALERT_2_G | Number C-C Bonds with Positive Residual Density. | 12     | Info   |

---

0 **ALERT level A** = Most likely a serious problem - resolve or explain  
0 **ALERT level B** = A potentially serious problem, consider carefully  
3 **ALERT level C** = Check. Ensure it is not caused by an omission or oversight  
11 **ALERT level G** = General information/check it is not something unexpected

4 ALERT type 1 CIF construction/syntax error, inconsistent or missing data  
3 ALERT type 2 Indicator that the structure model may be wrong or deficient  
4 ALERT type 3 Indicator that the structure quality may be low  
3 ALERT type 4 Improvement, methodology, query or suggestion  
0 ALERT type 5 Informative message, check

---

It is advisable to attempt to resolve as many as possible of the alerts in all categories. Often the minor alerts point to easily fixed oversights, errors and omissions in your CIF or refinement strategy, so attention to these fine details can be worthwhile. In order to resolve some of the more serious problems it may be necessary to carry out additional measurements or structure refinements. However, the purpose of your study may justify the reported deviations and the more serious of these should normally be commented upon in the discussion or experimental section of a paper or in the "special\_details" fields of the CIF. checkCIF was carefully designed to identify outliers and unusual parameters, but every test has its limitations and alerts that are not important in a particular case may appear. Conversely, the absence of alerts does not guarantee there are no aspects of the results needing attention. It is up to the individual to critically assess their own results and, if necessary, seek expert advice.

#### **Publication of your CIF in IUCr journals**

A basic structural check has been run on your CIF. These basic checks will be run on all CIFs submitted for publication in IUCr journals (*Acta Crystallographica*, *Journal of Applied Crystallography*, *Journal of Synchrotron Radiation*); however, if you intend to submit to *Acta Crystallographica Section C* or *E* or *IUCrData*, you should make sure that full publication checks are run on the final version of your CIF prior to submission.

#### **Publication of your CIF in other journals**

Please refer to the *Notes for Authors* of the relevant journal for any special instructions relating to CIF submission.

---

**PLATON version of 19/02/2022; check.def file version of 19/02/2022**

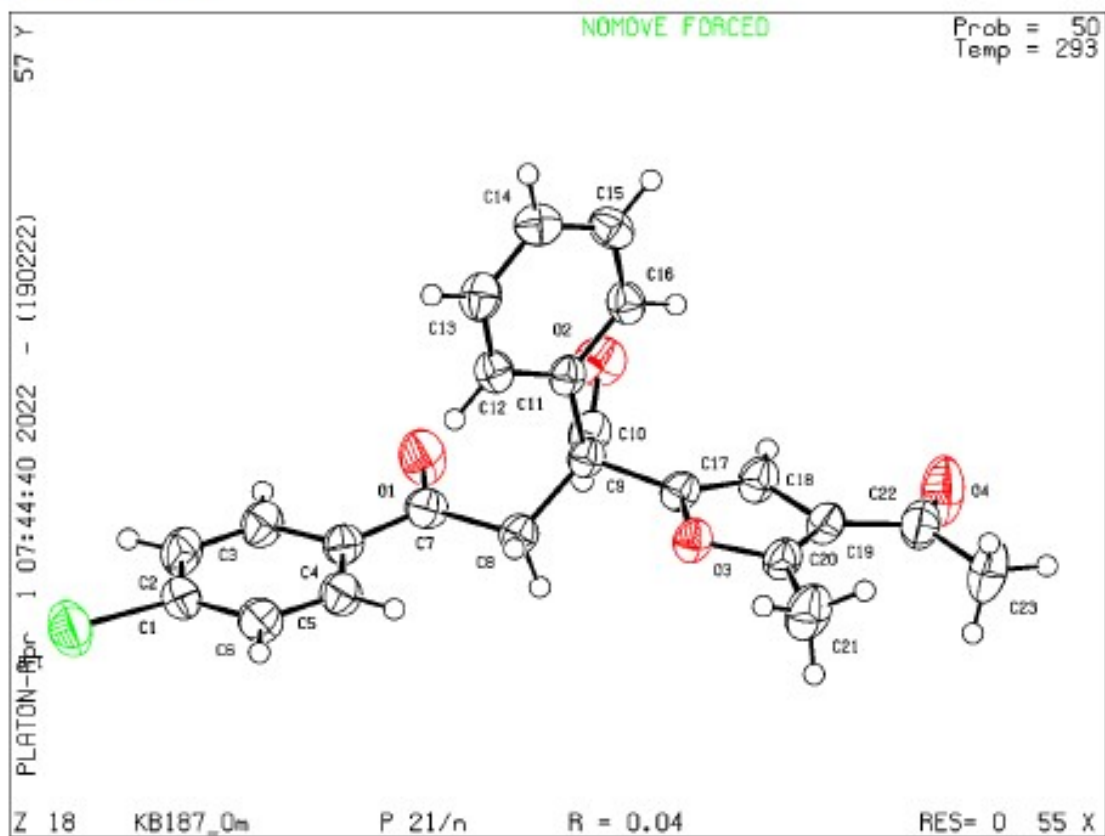

## 6. References

- 1) M. Ni, J. Zhang, X. Liang, Y. Jiang, T-P. Loh, *Chem. Commun.*, 2017, **53**, 12286.
- 2) Y. Yu, Y. Chen, W. Wu, H. Jiang., *Chem. Commun.*, 2017, **53**, 640.
- 3) Li, C.; Li, J.; Zhou, F.; Li, C.; Wu, W. *J. Org. Chem.*, 2019, **84**, 11958.
- 4) H. Suzuki, S. Yoshioka, A. Igesaka, H. Nishioka, Y. Takeuchi, *Tetrahedron.*, 2013, **69**, 6399.

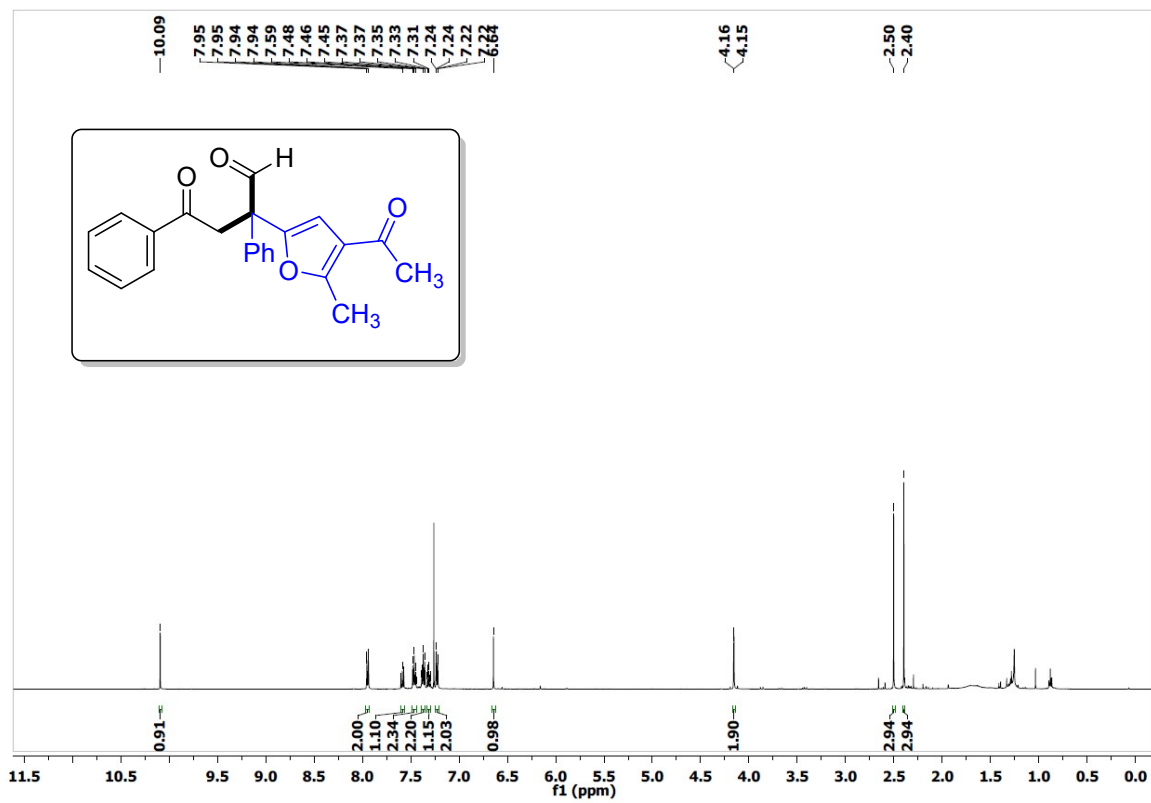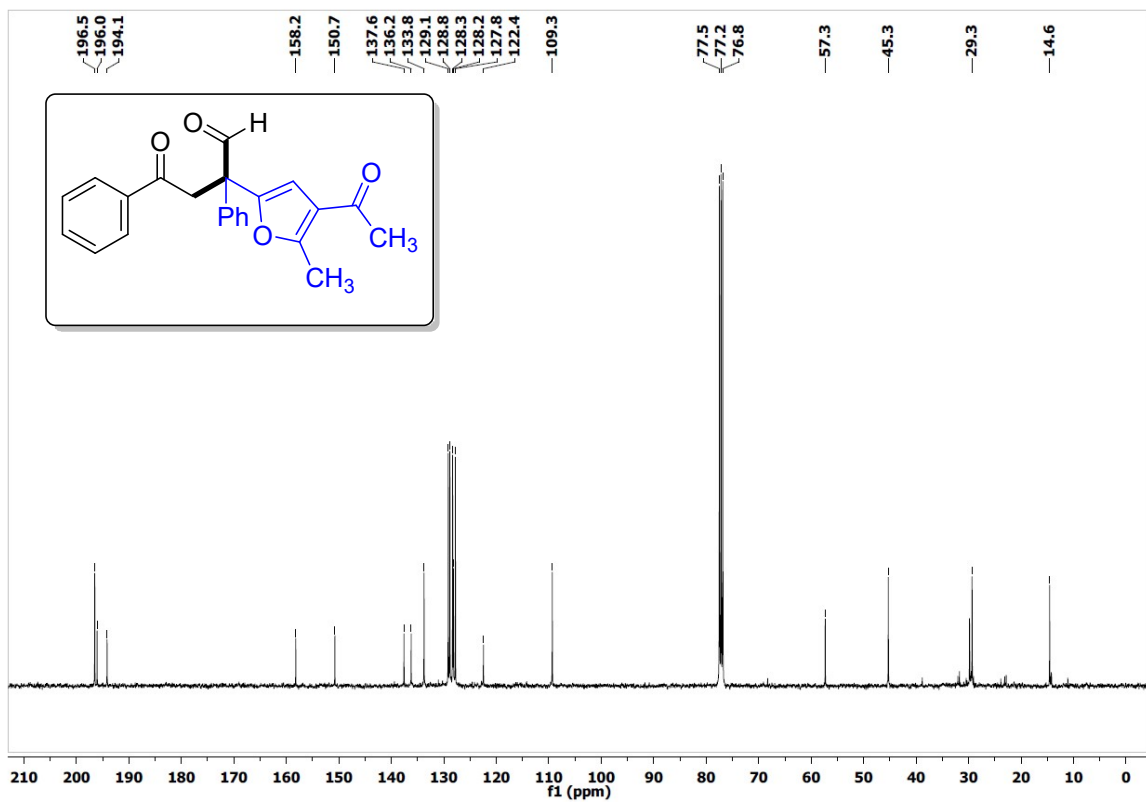



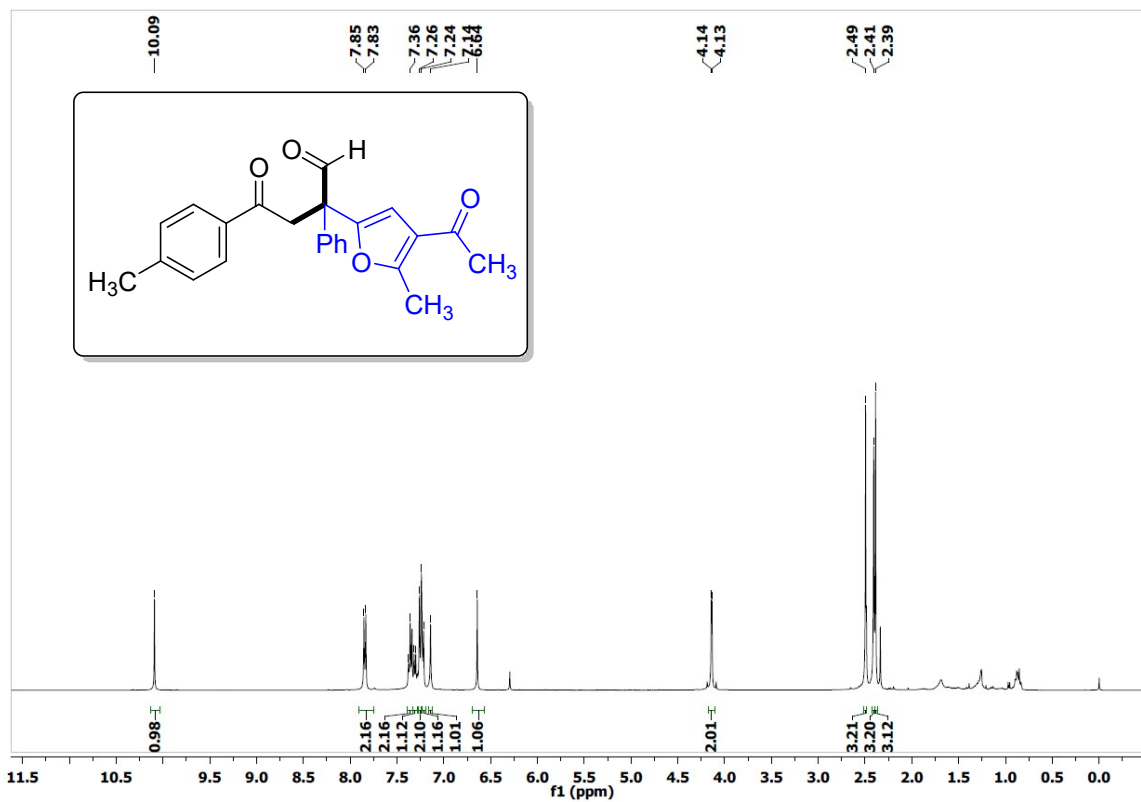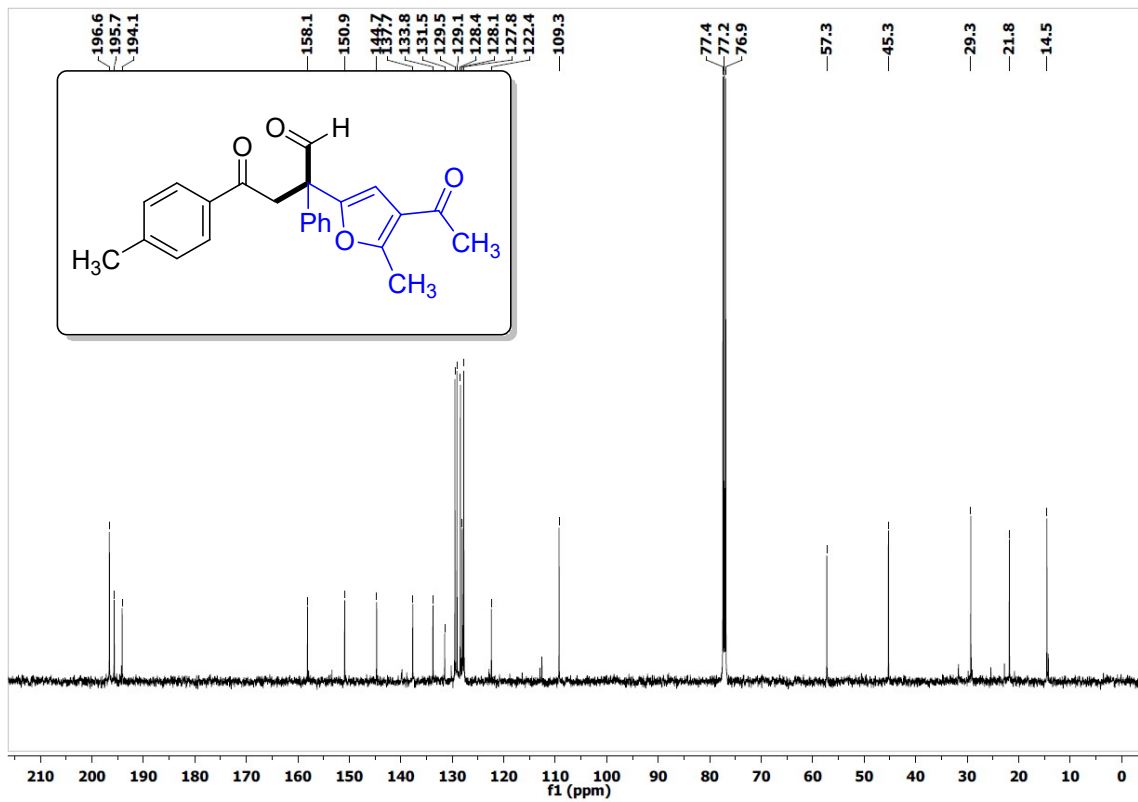

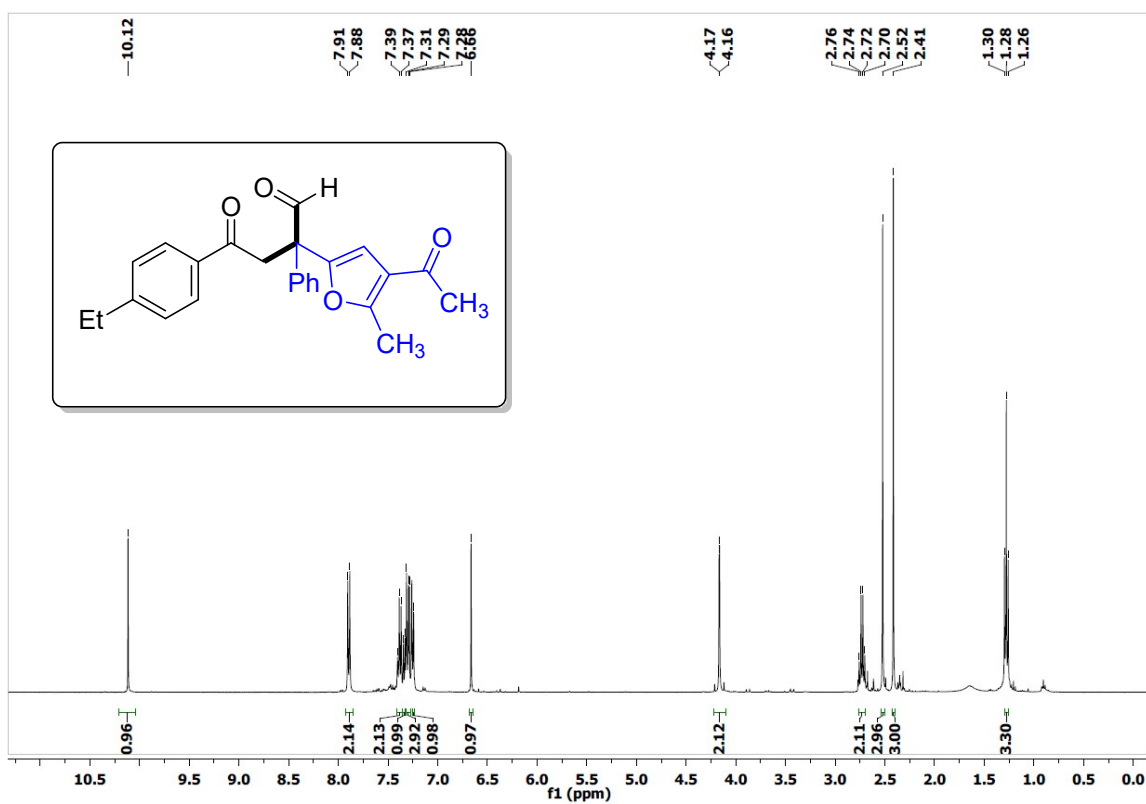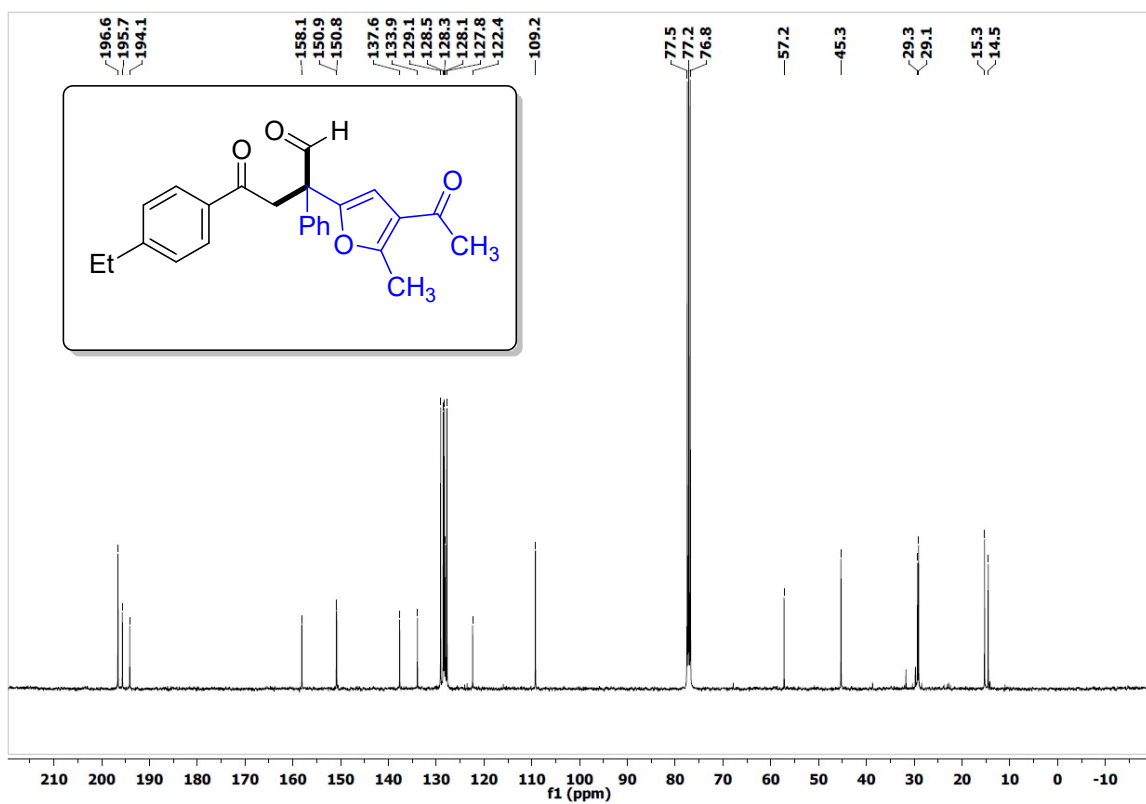

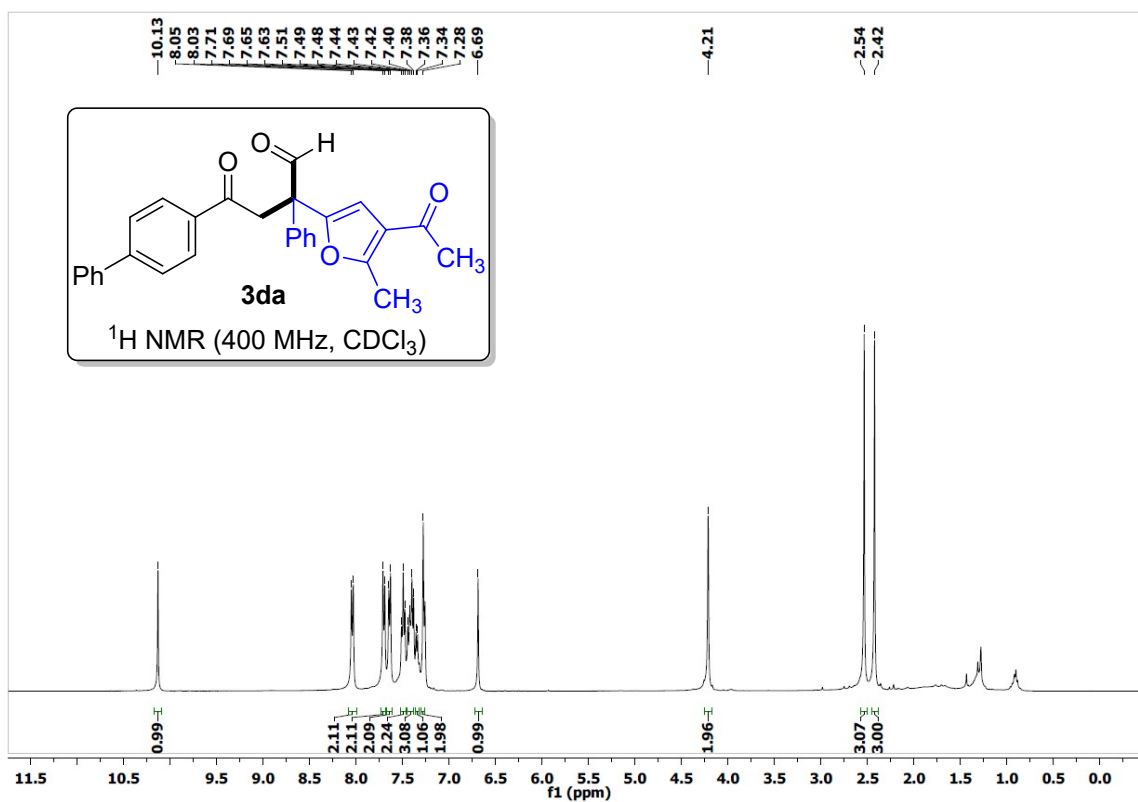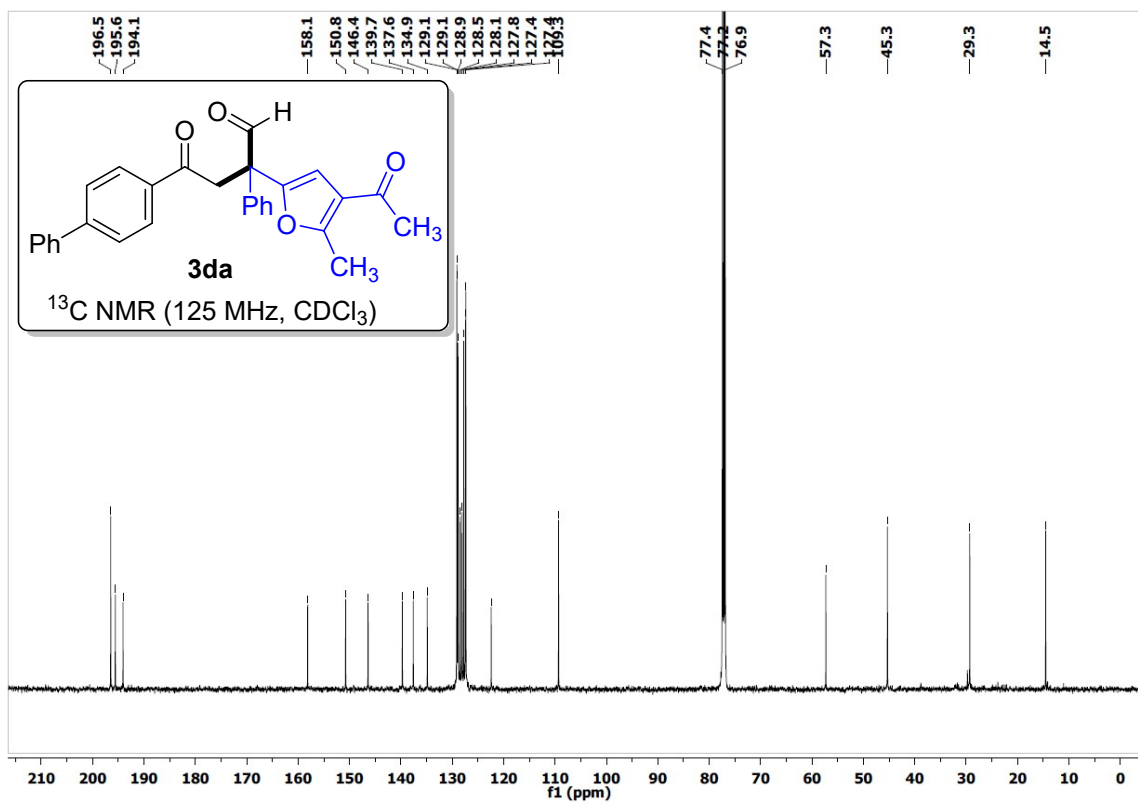

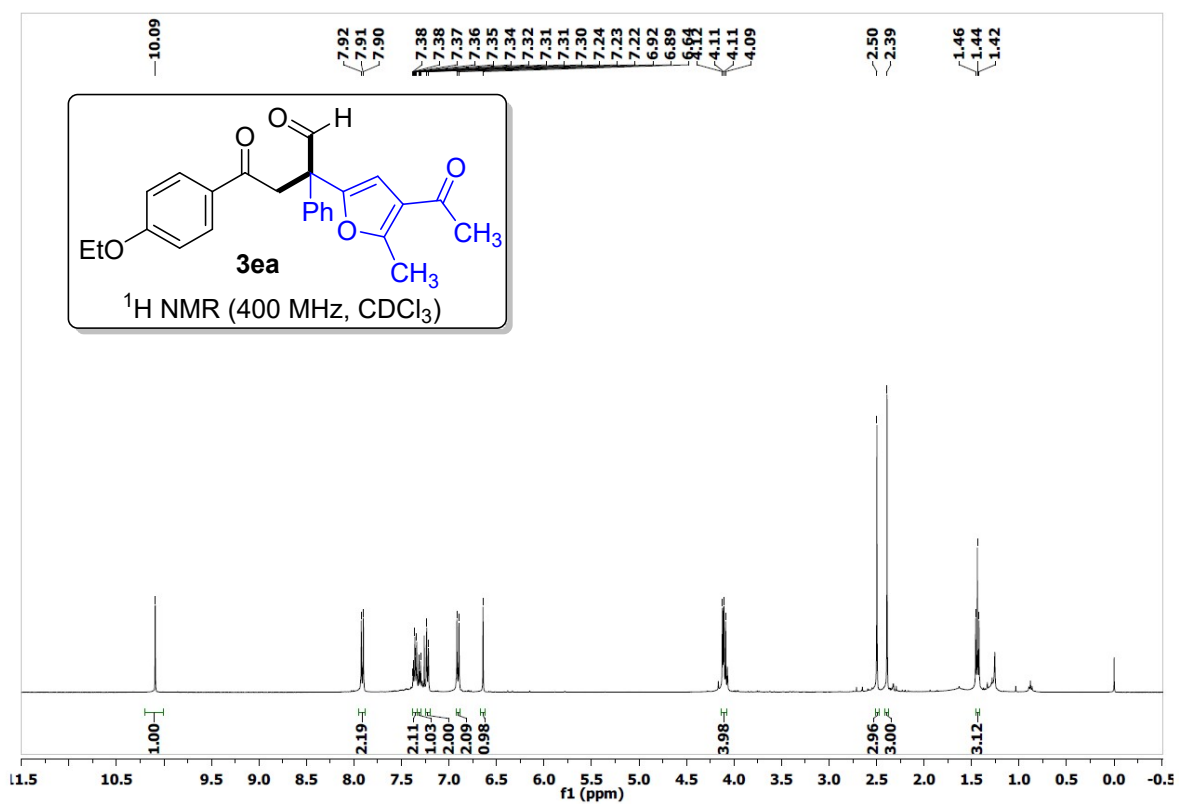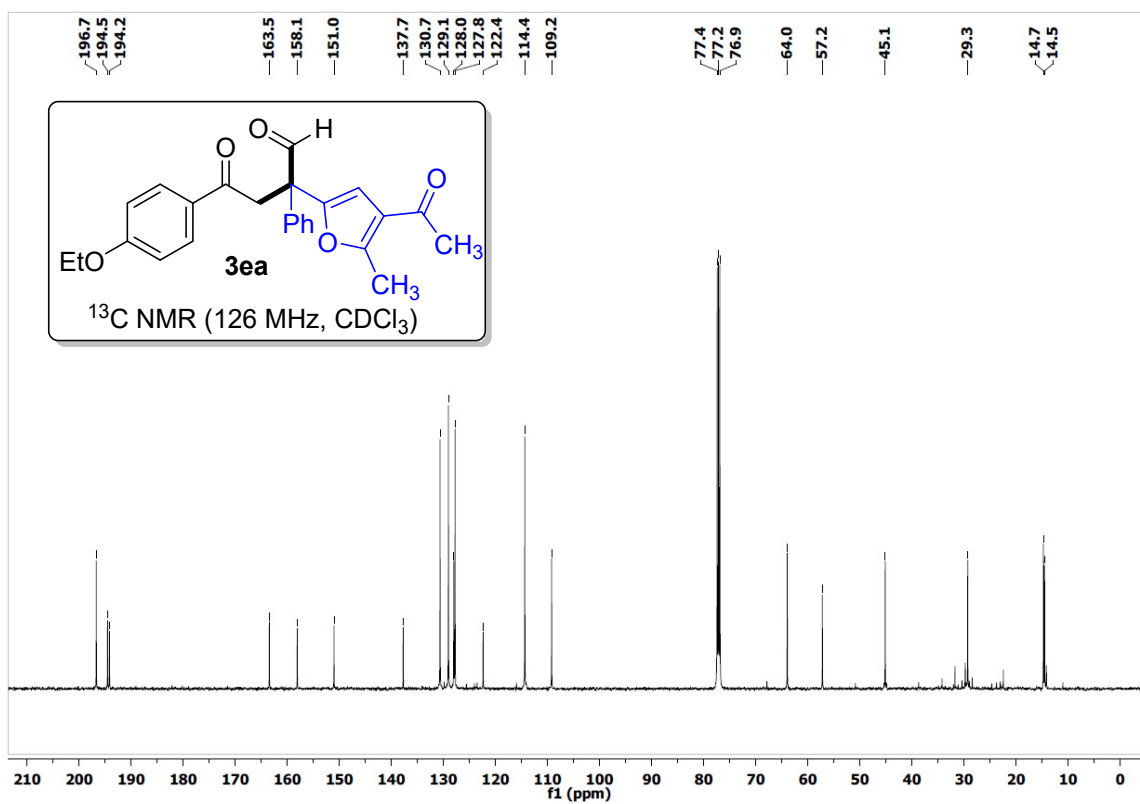

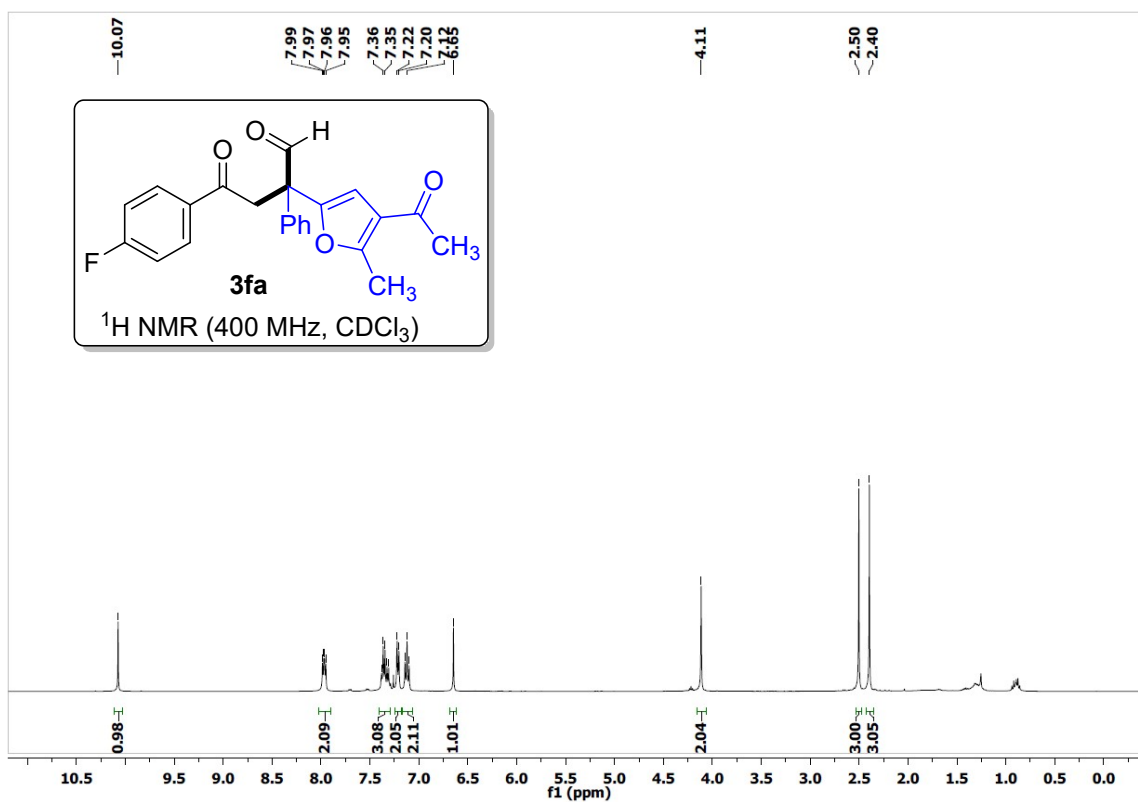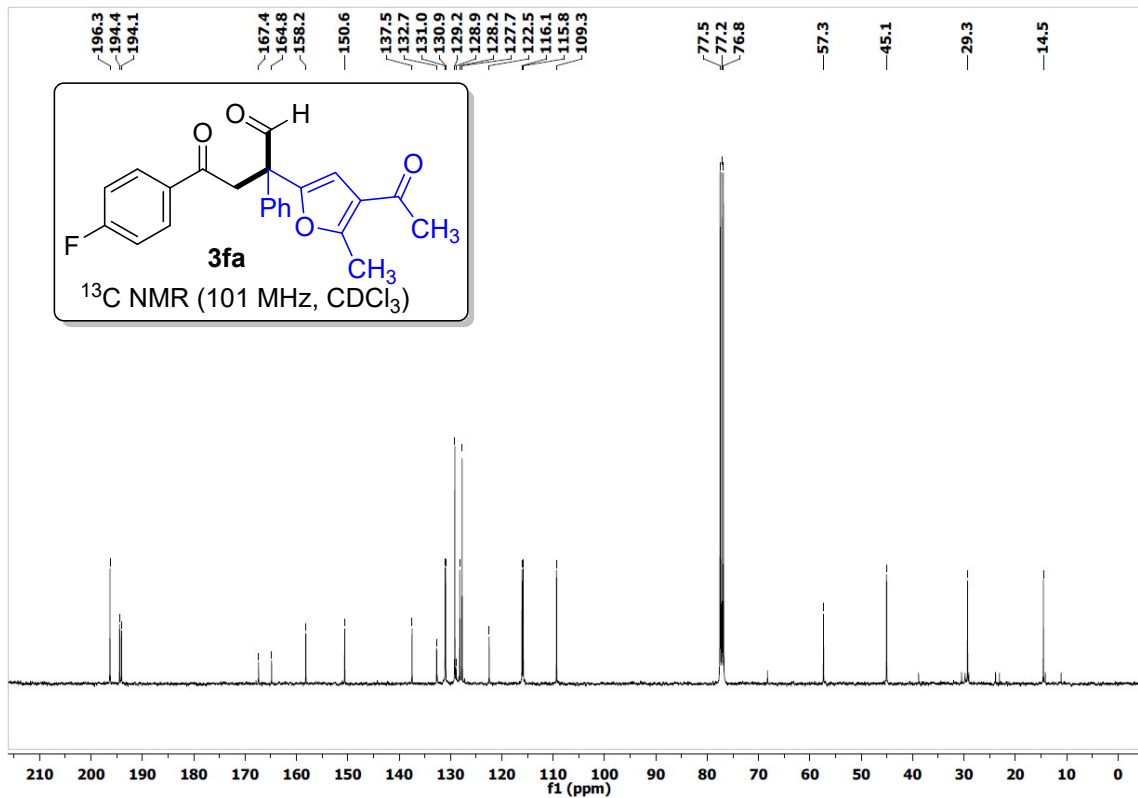

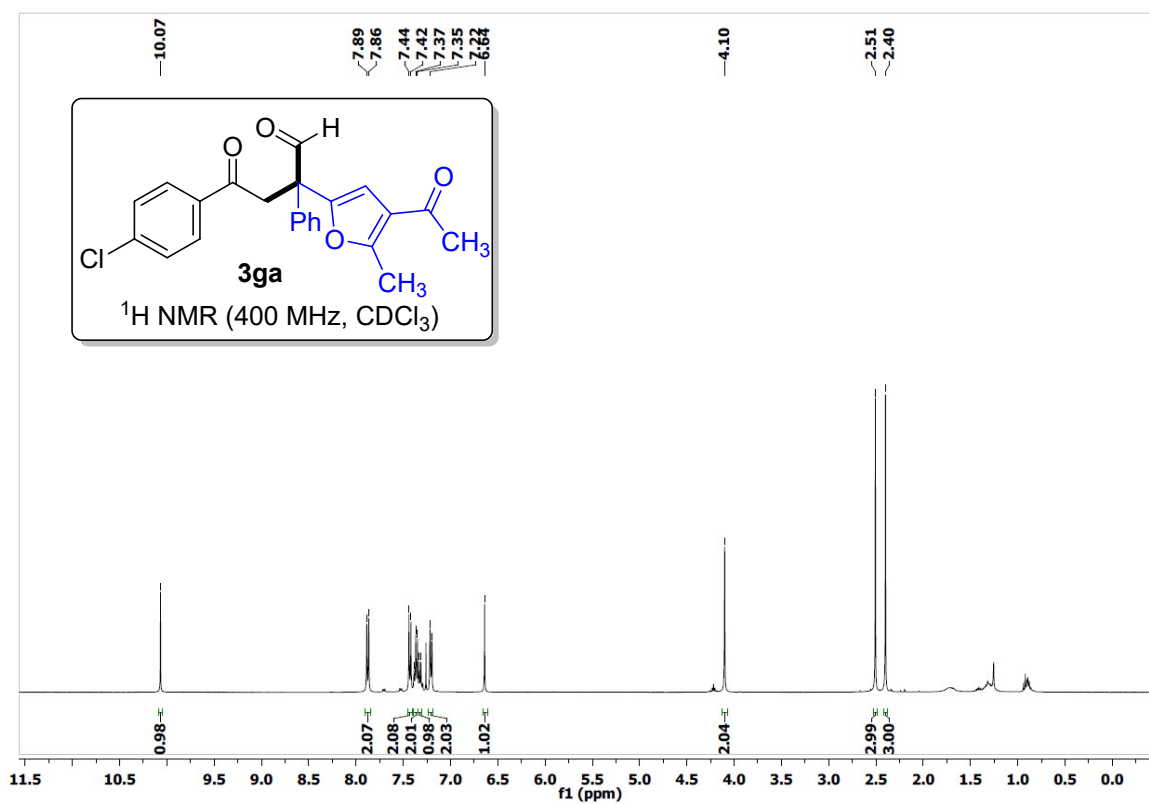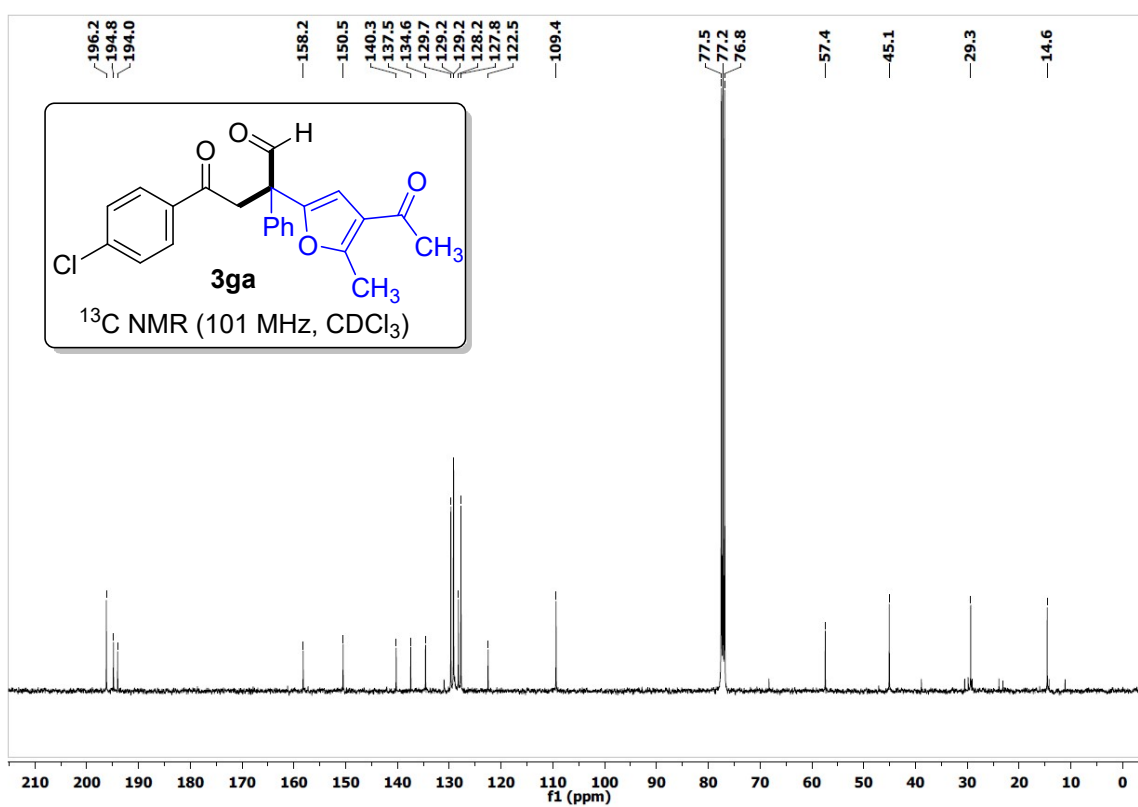

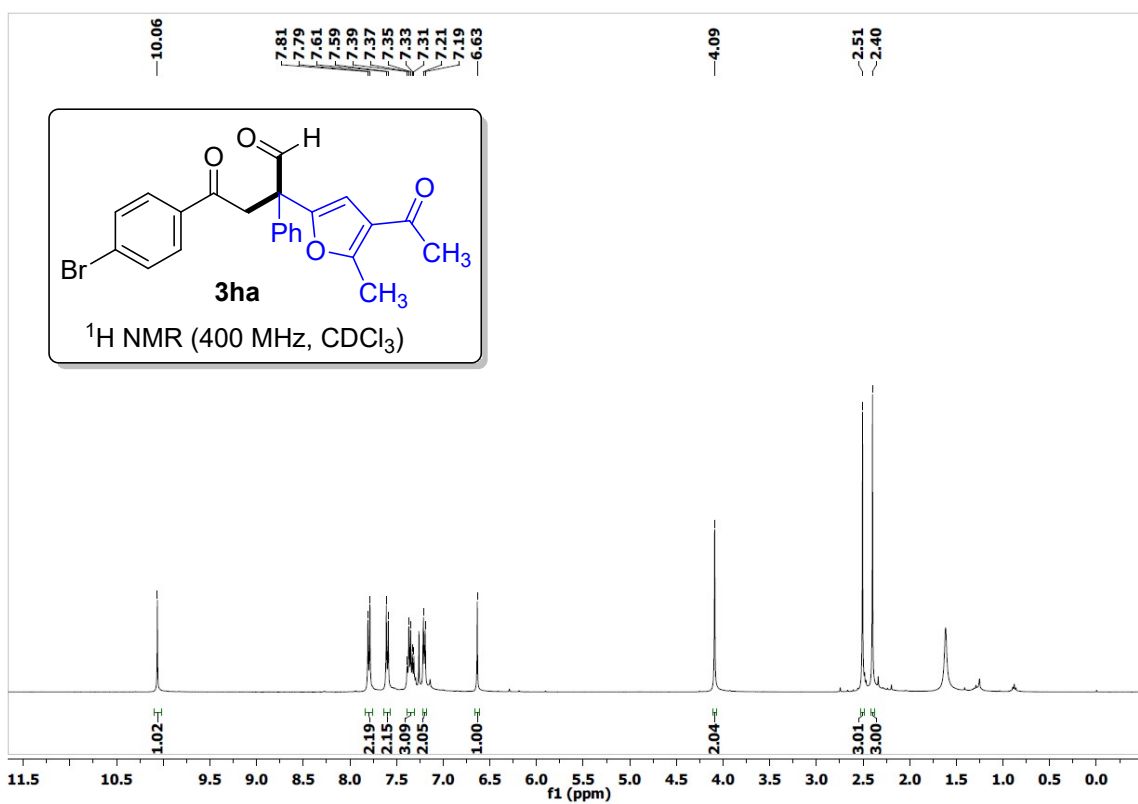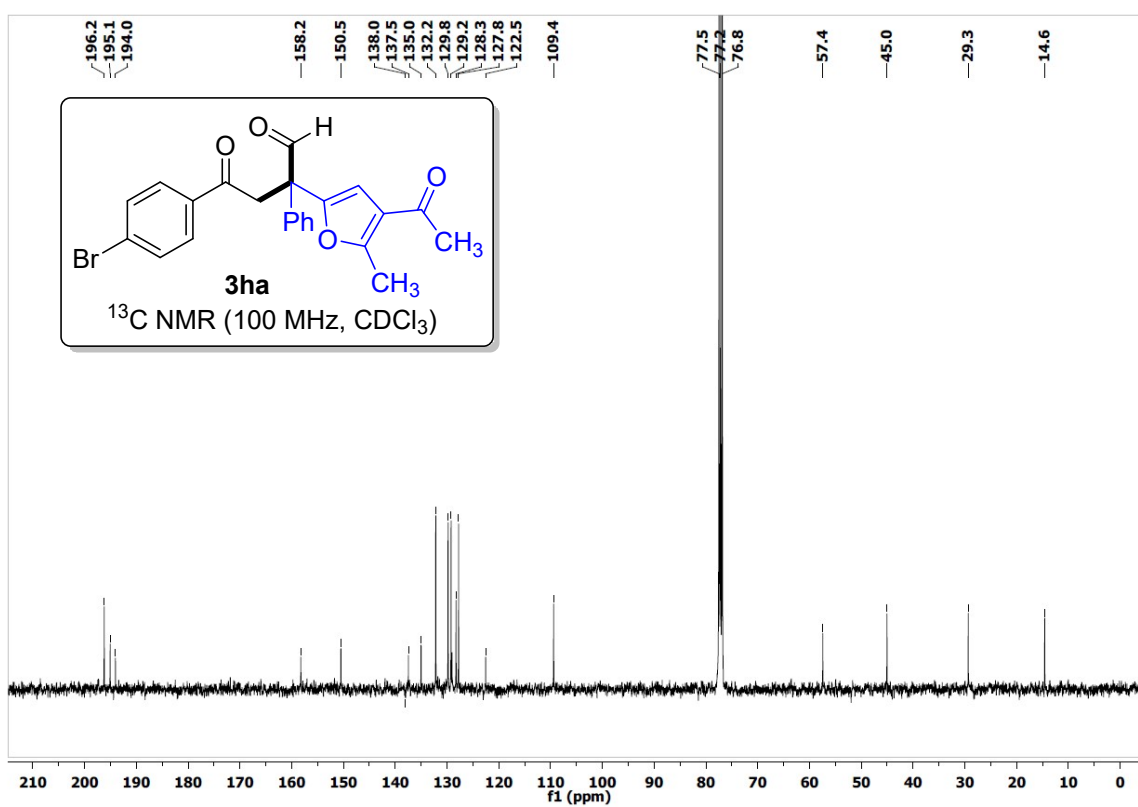

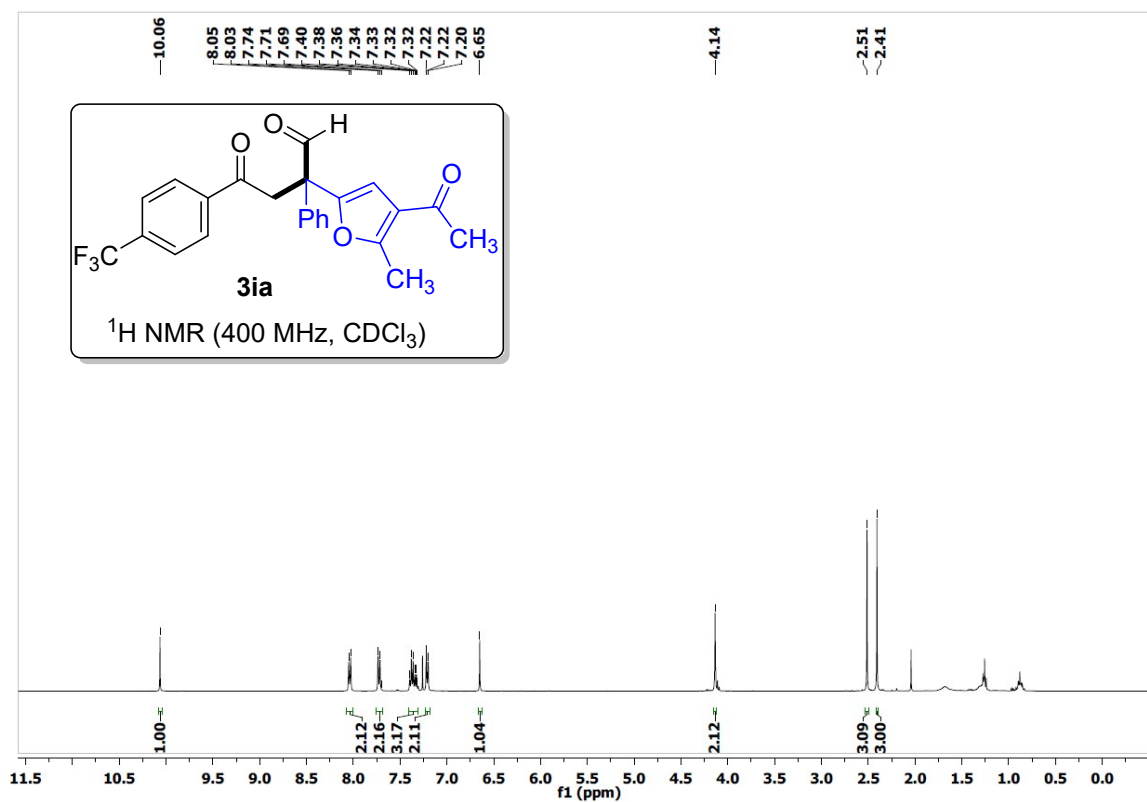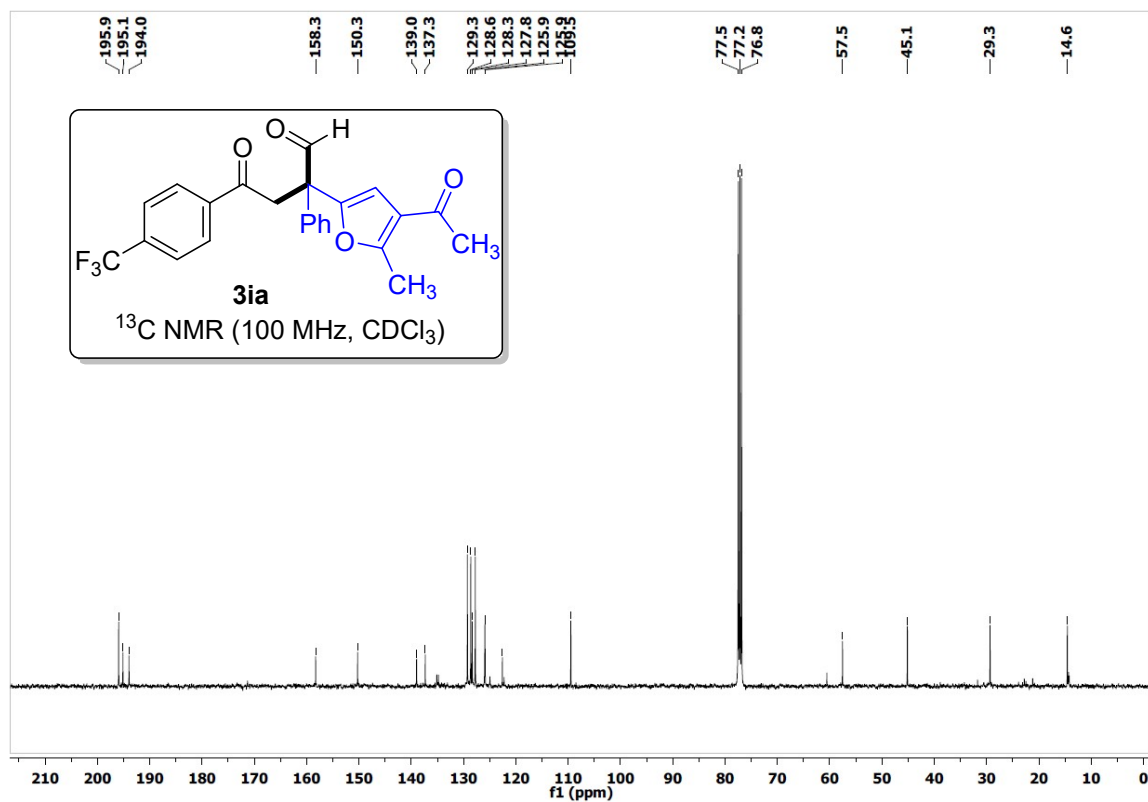



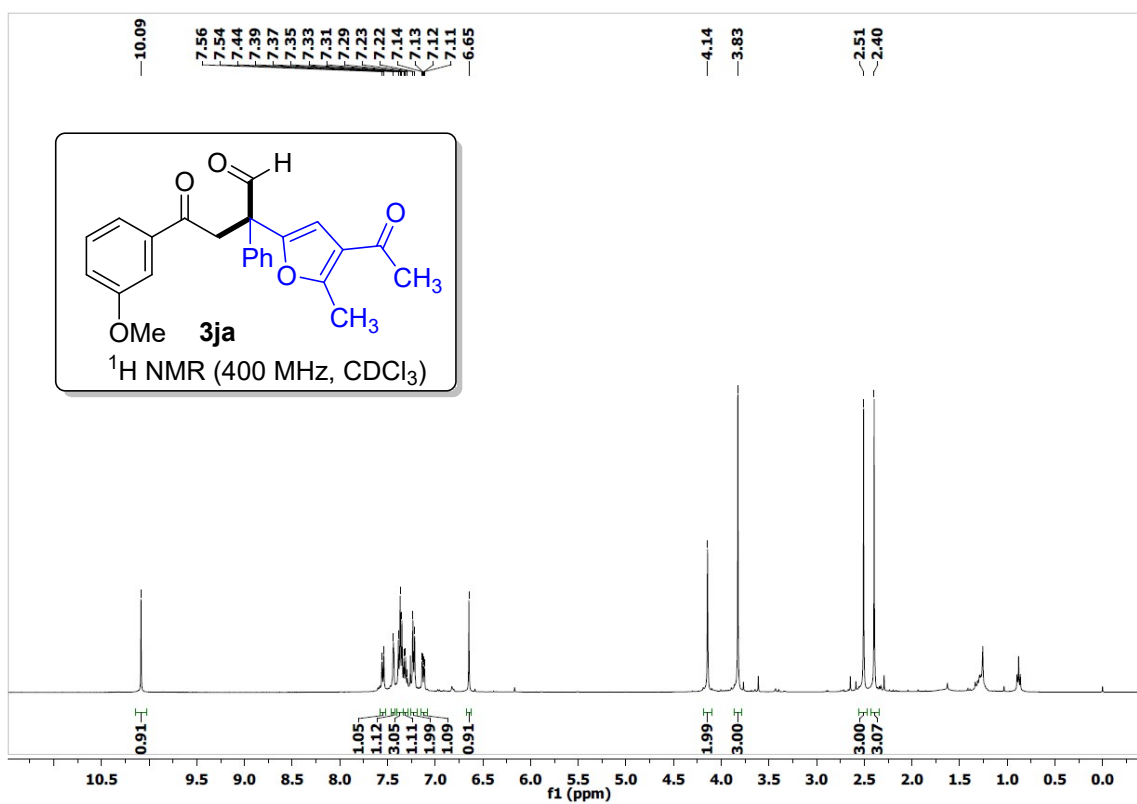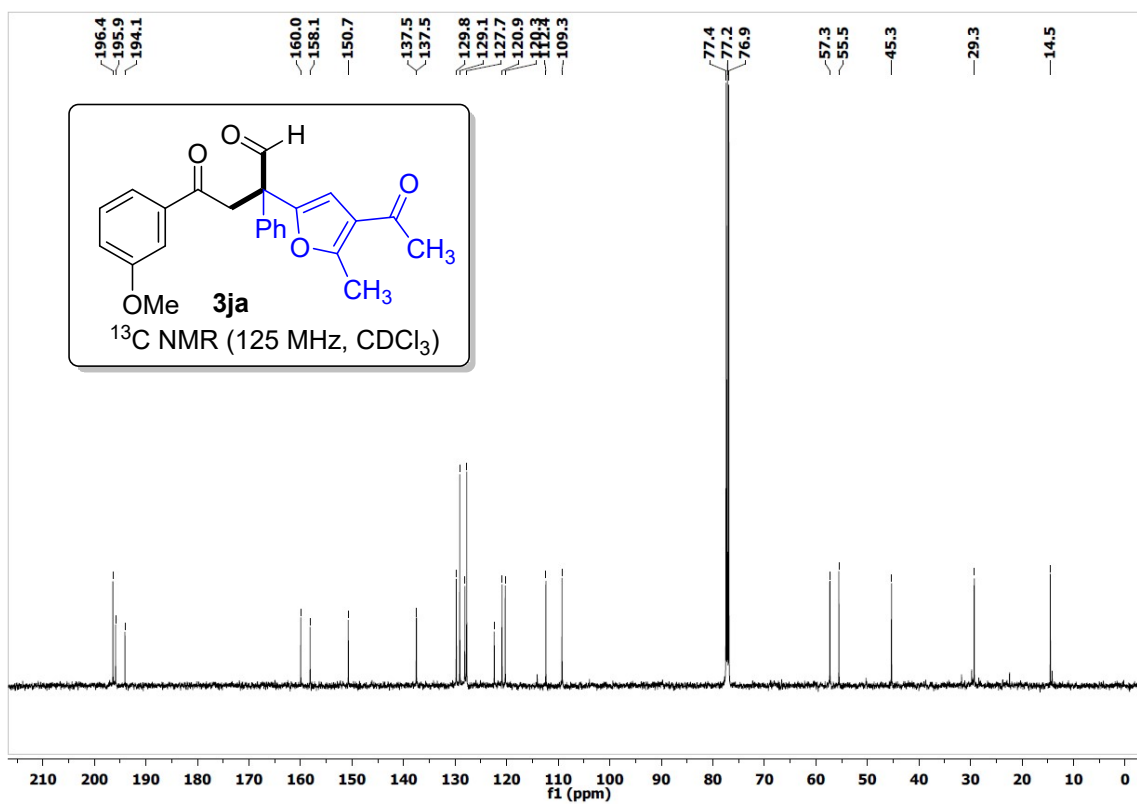

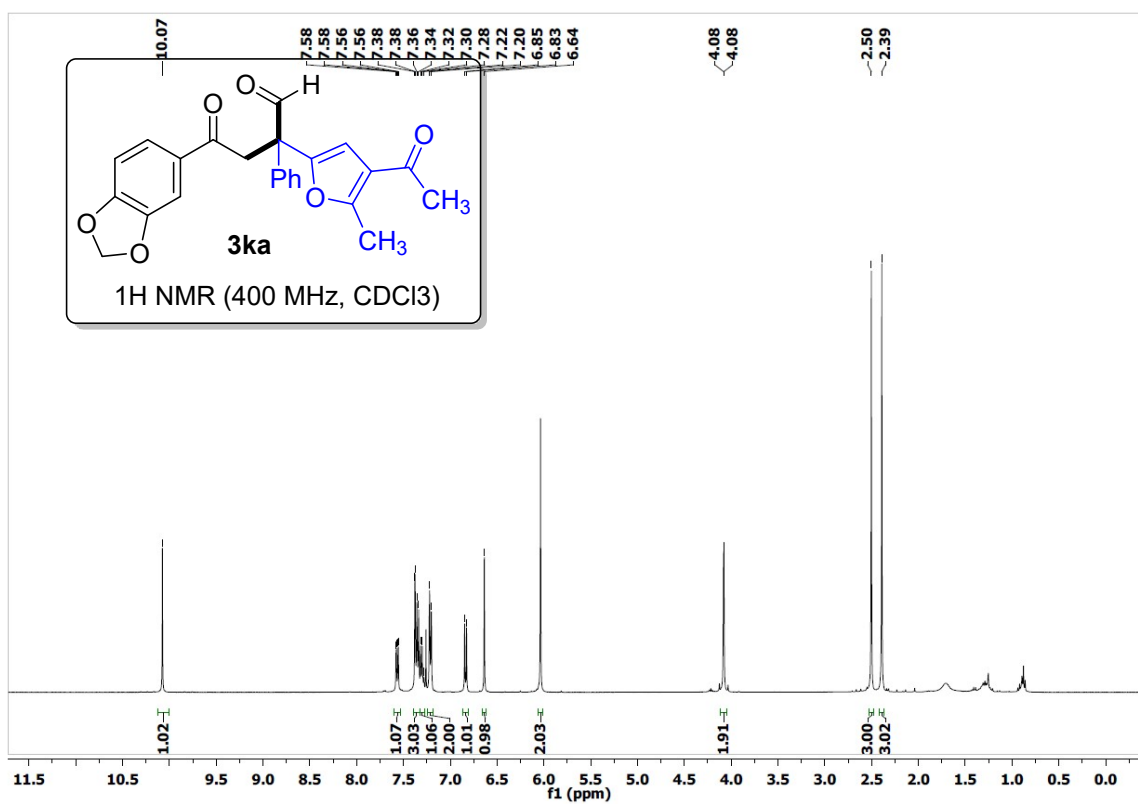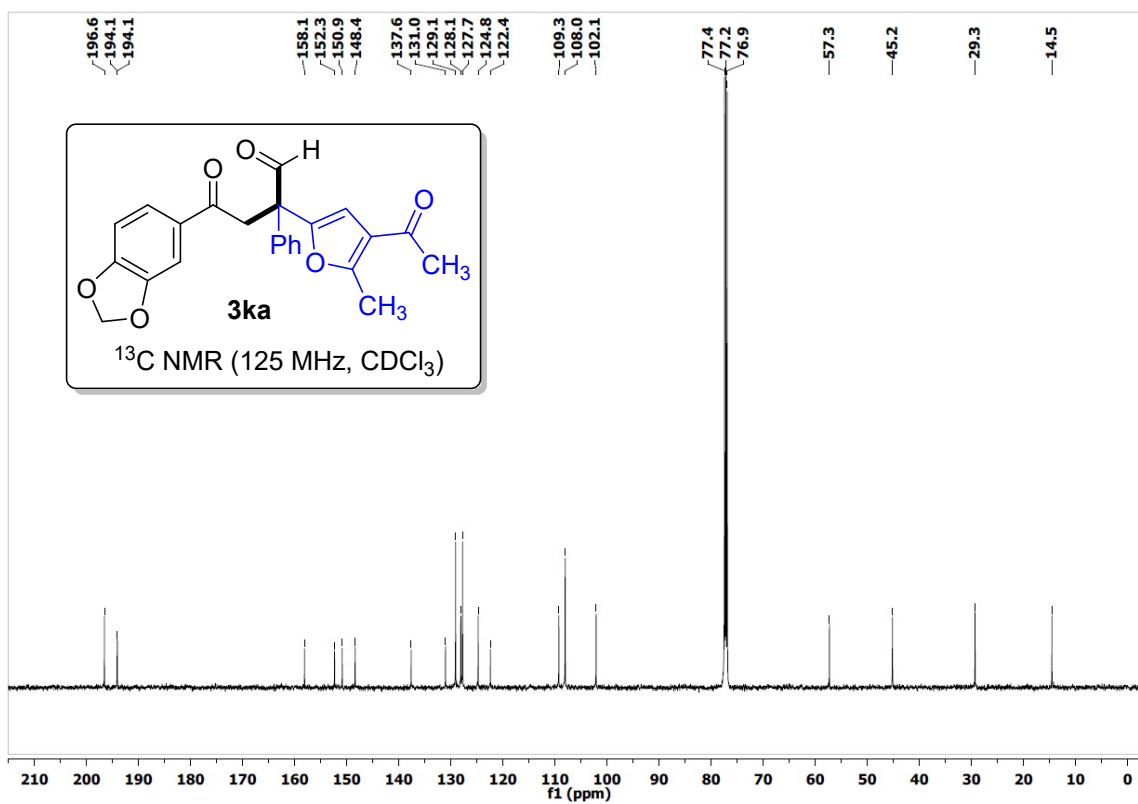

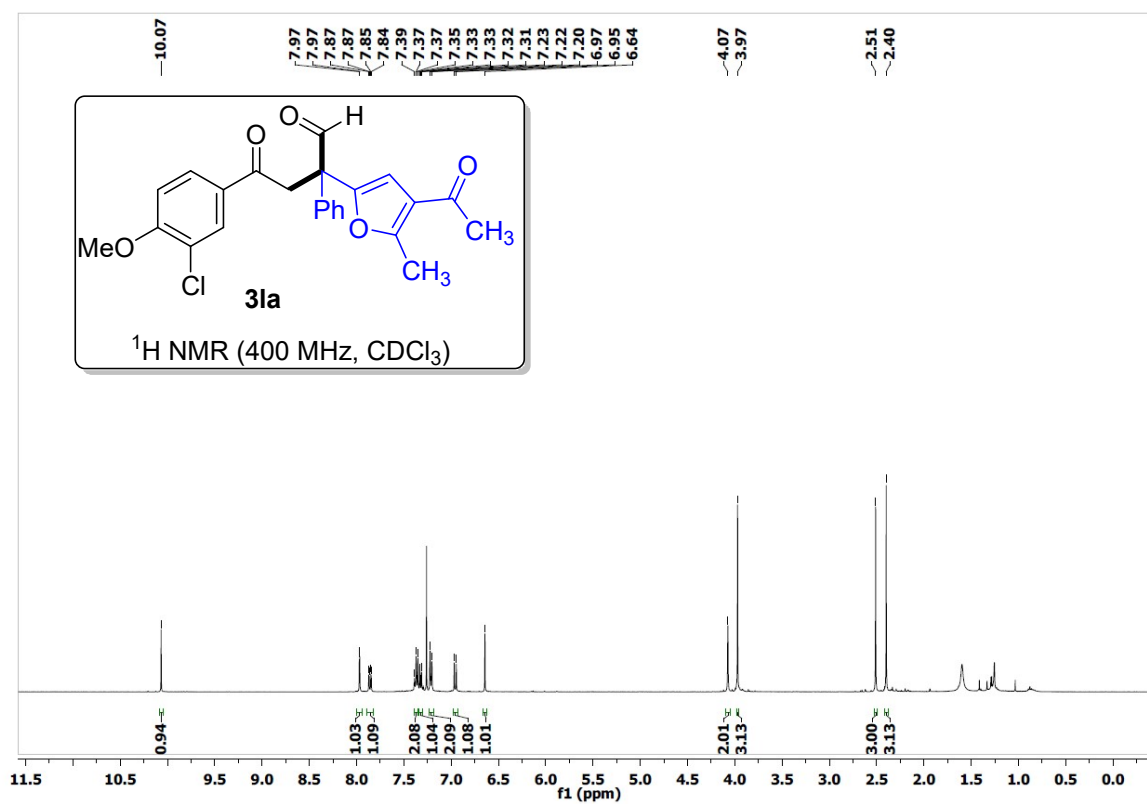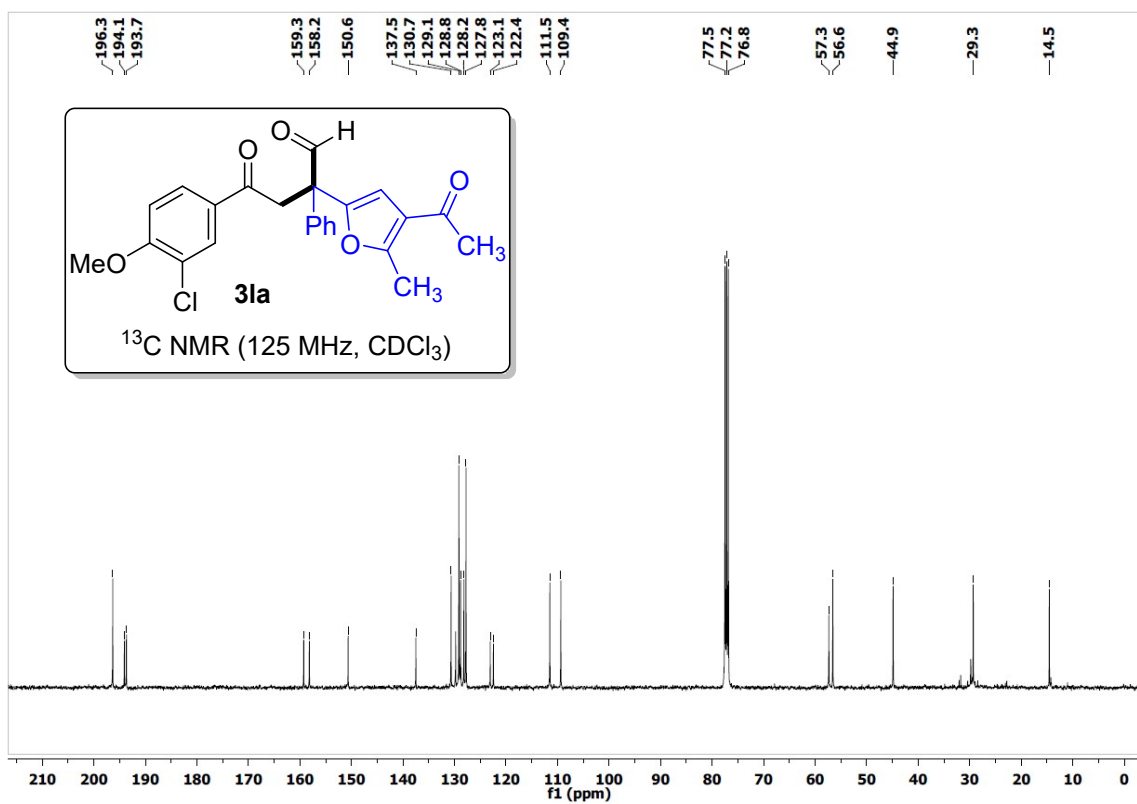

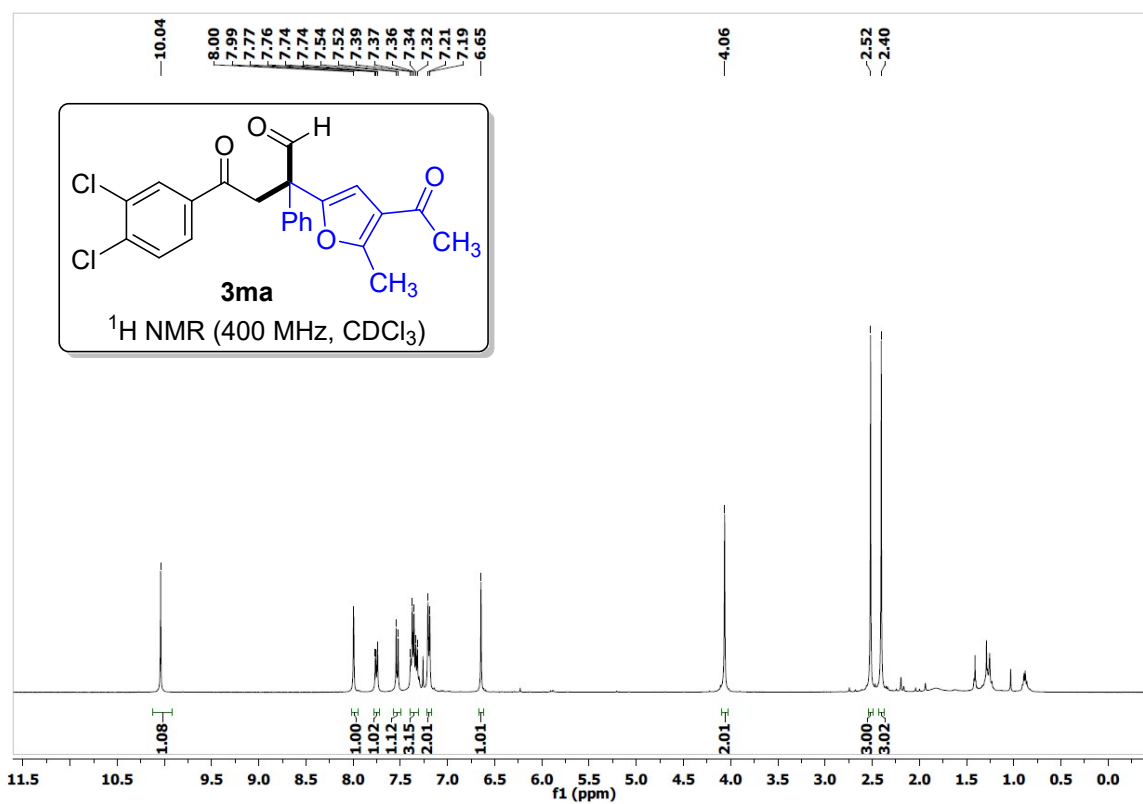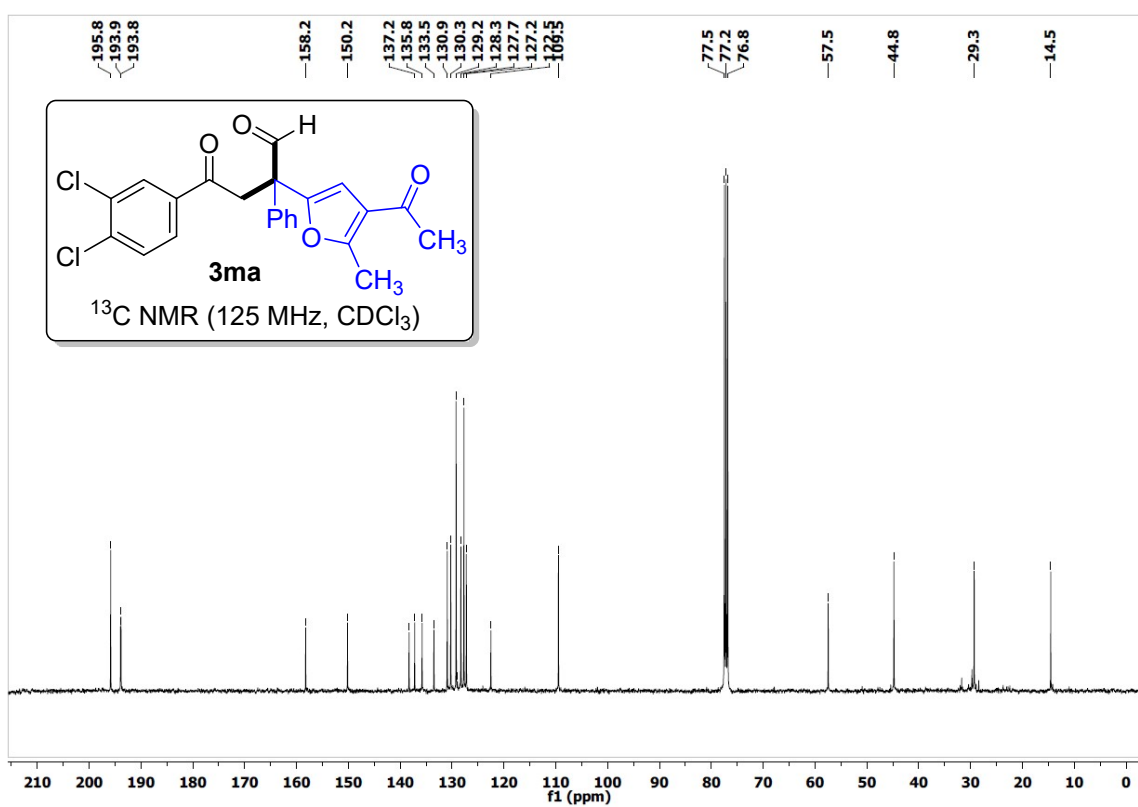

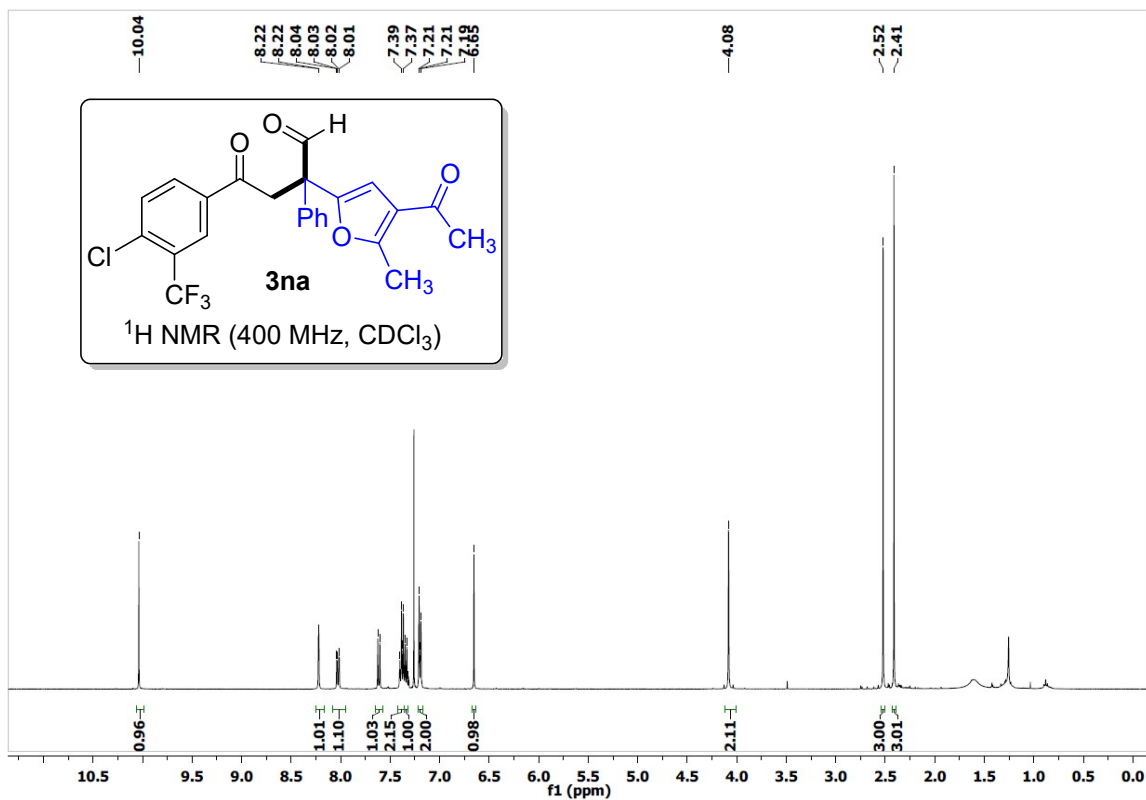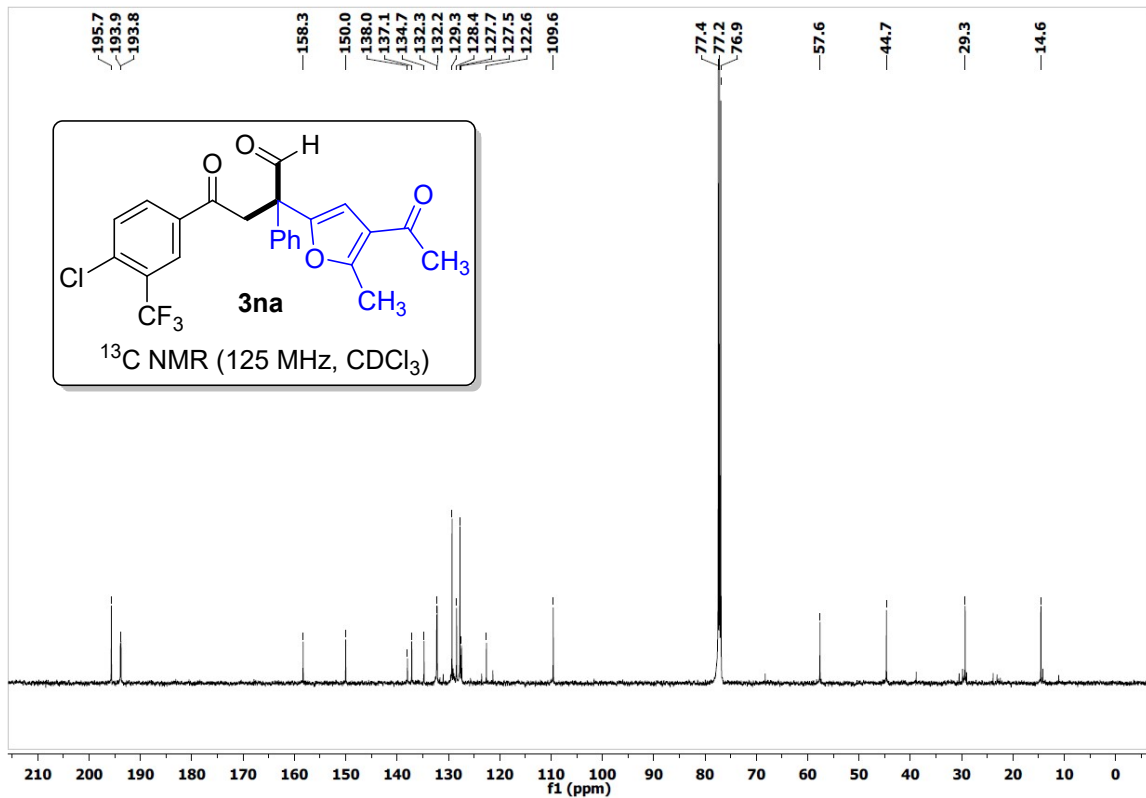

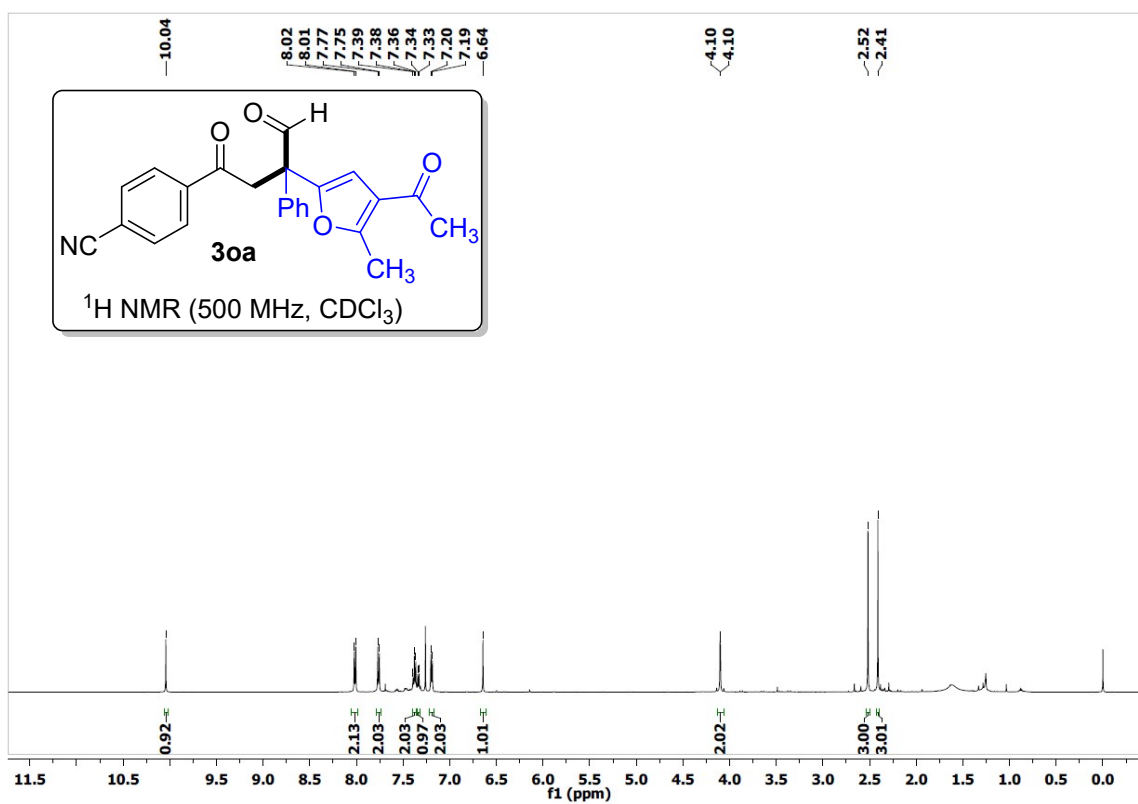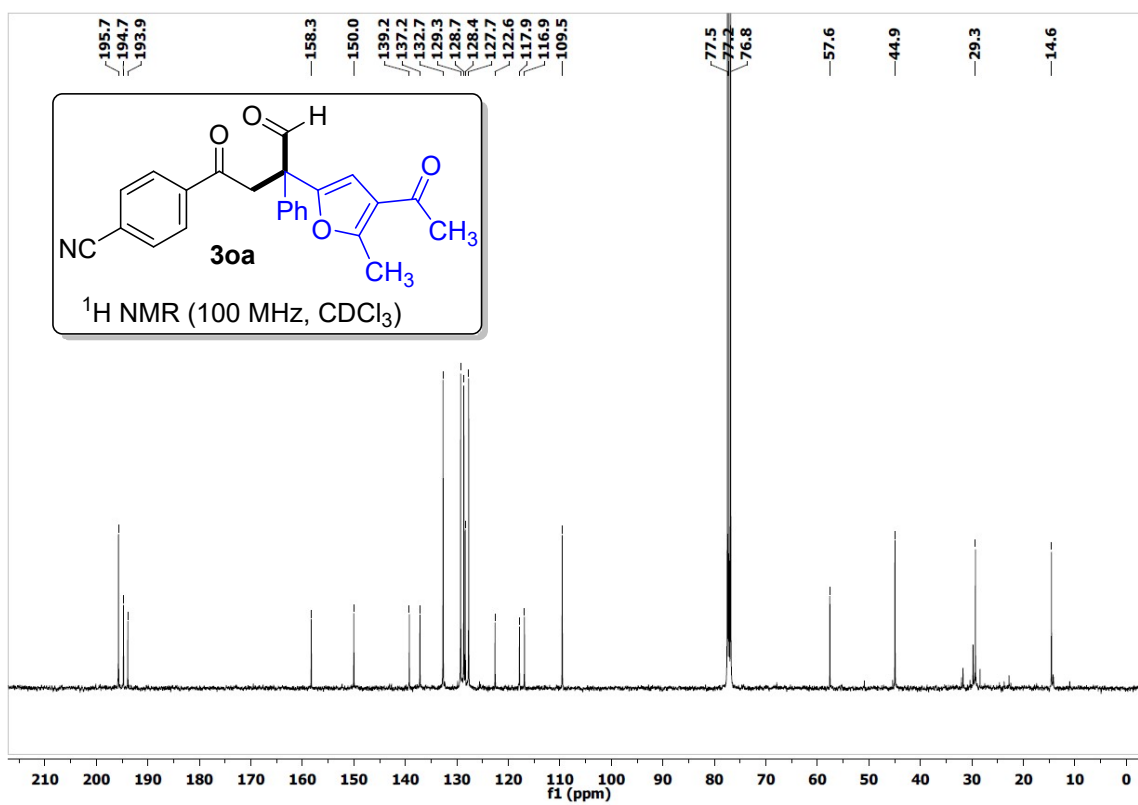

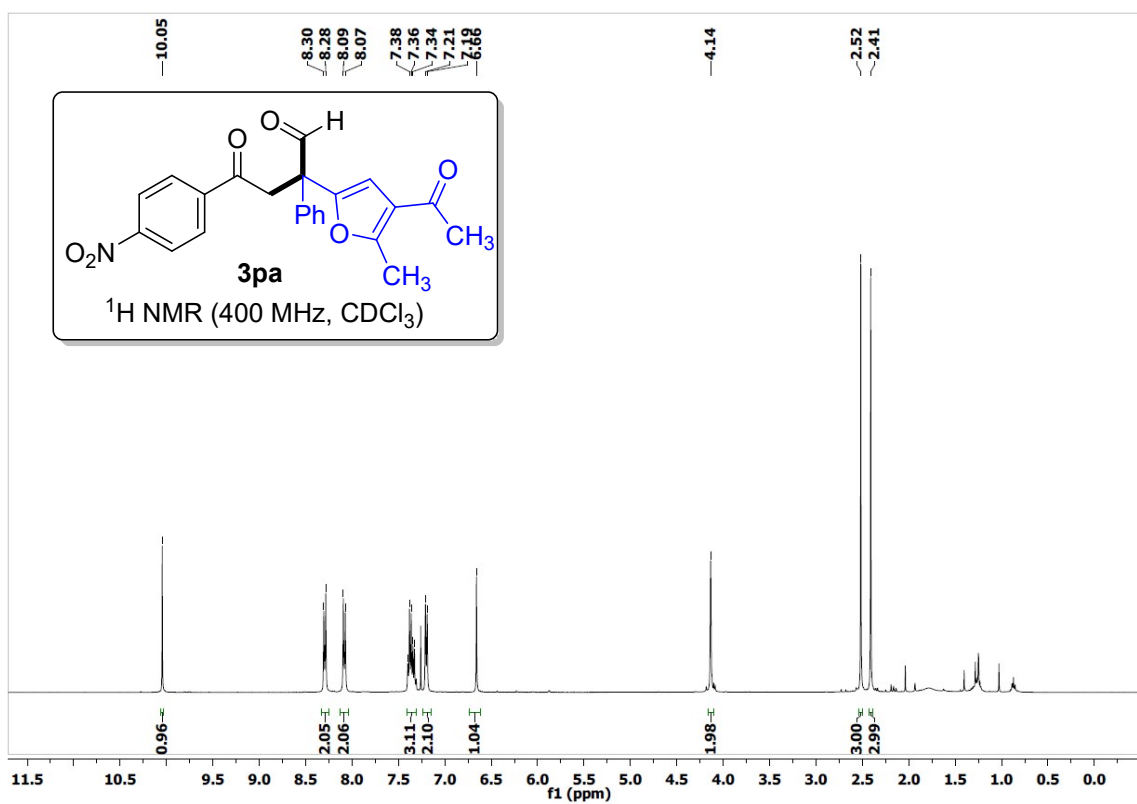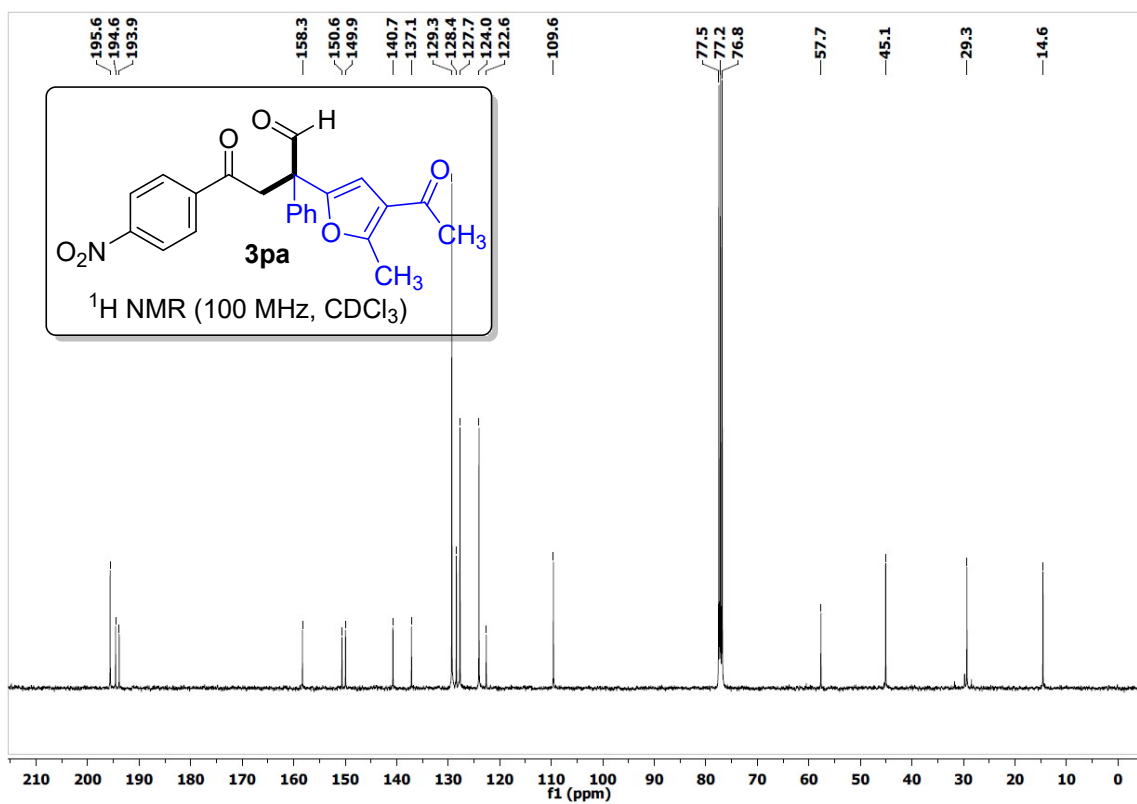

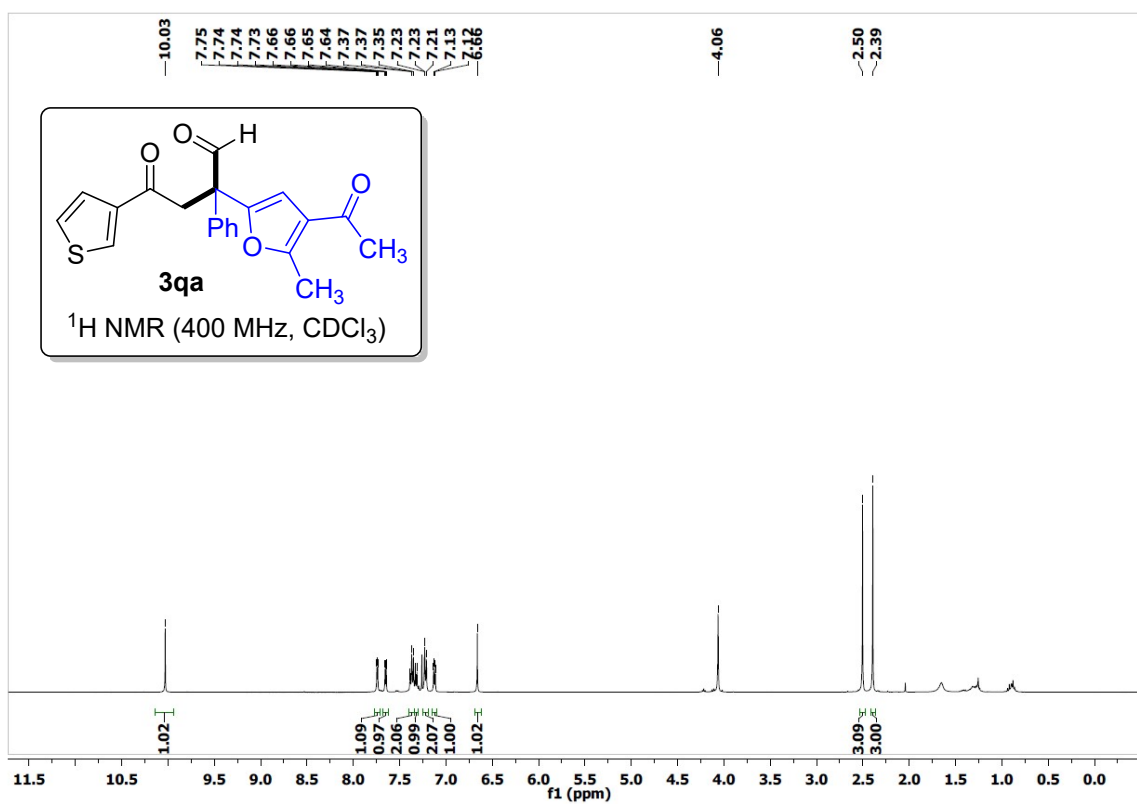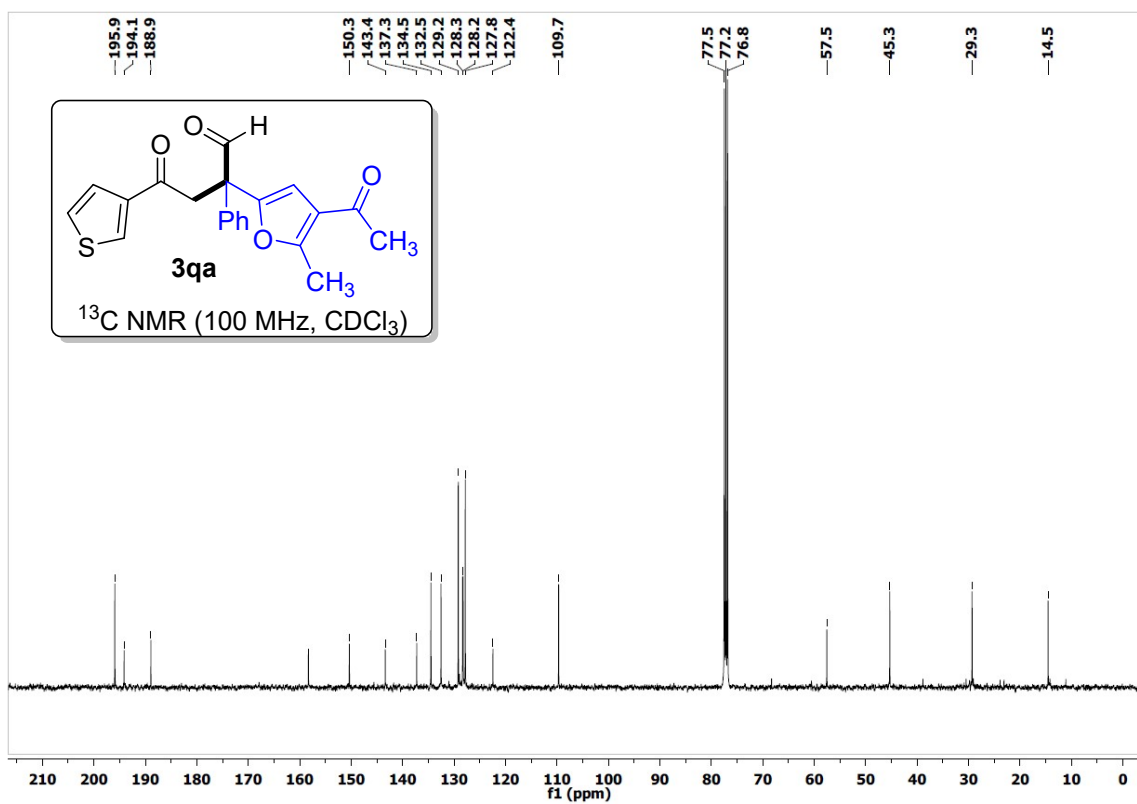



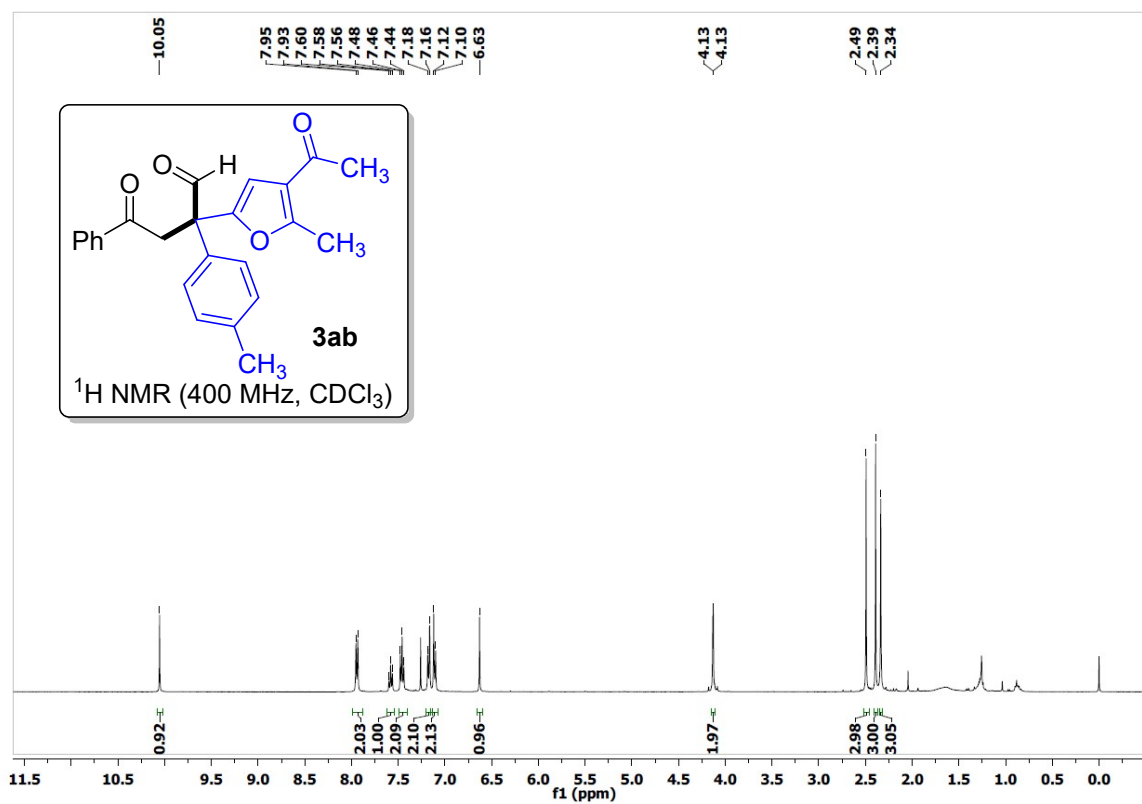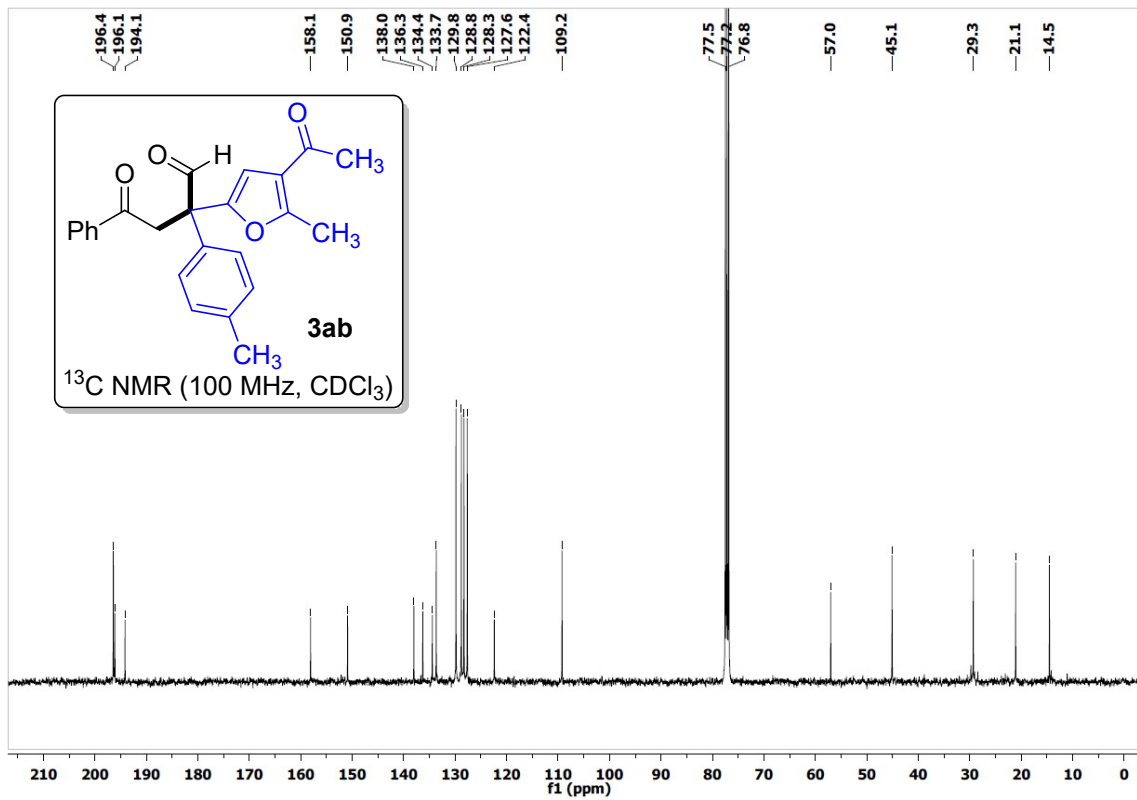

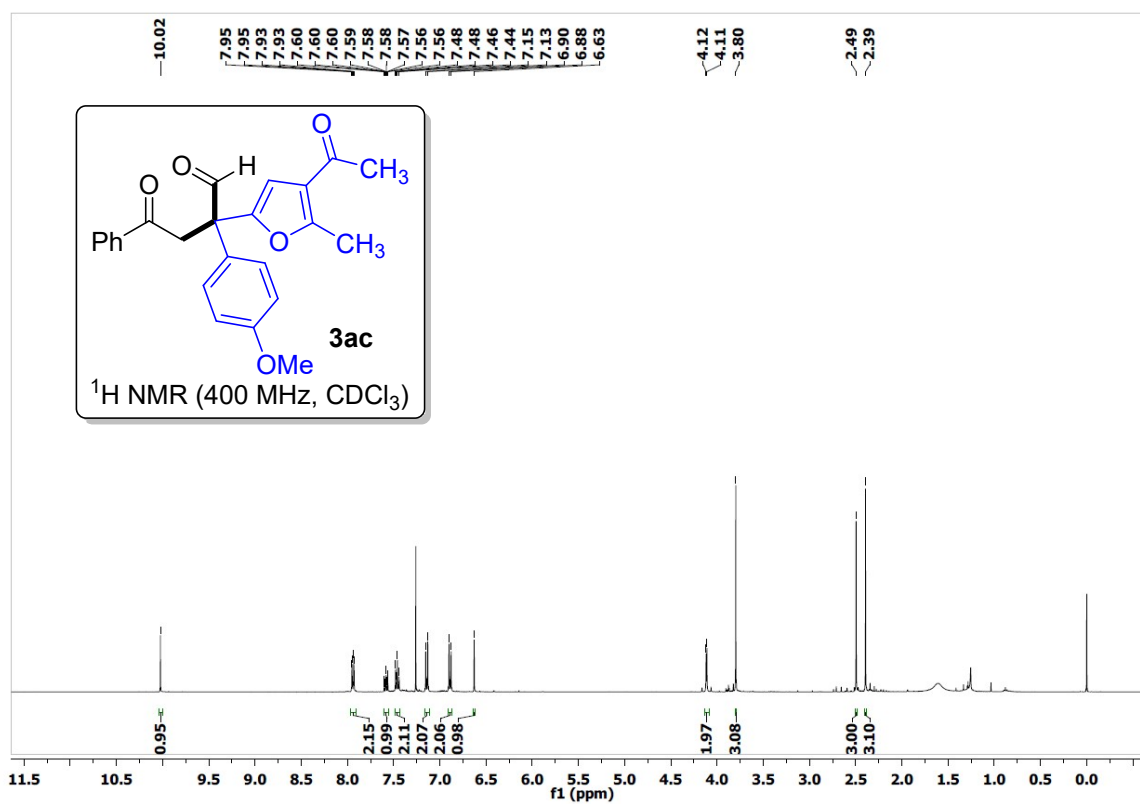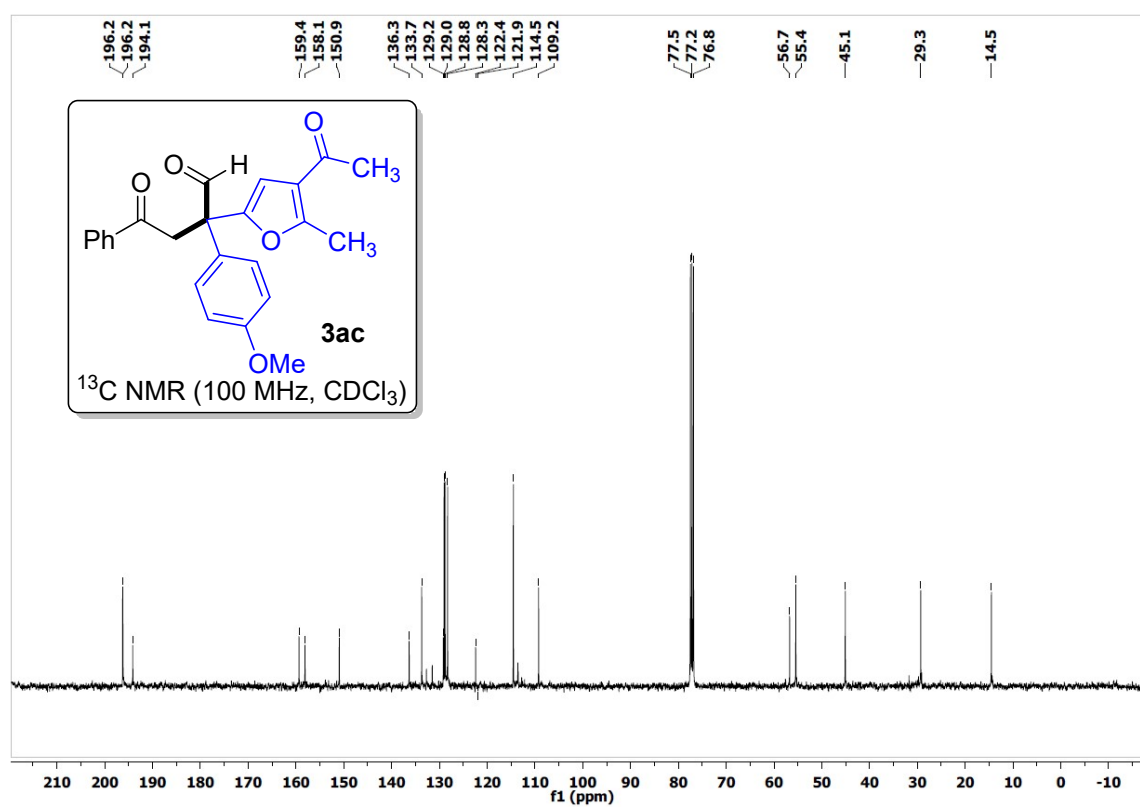

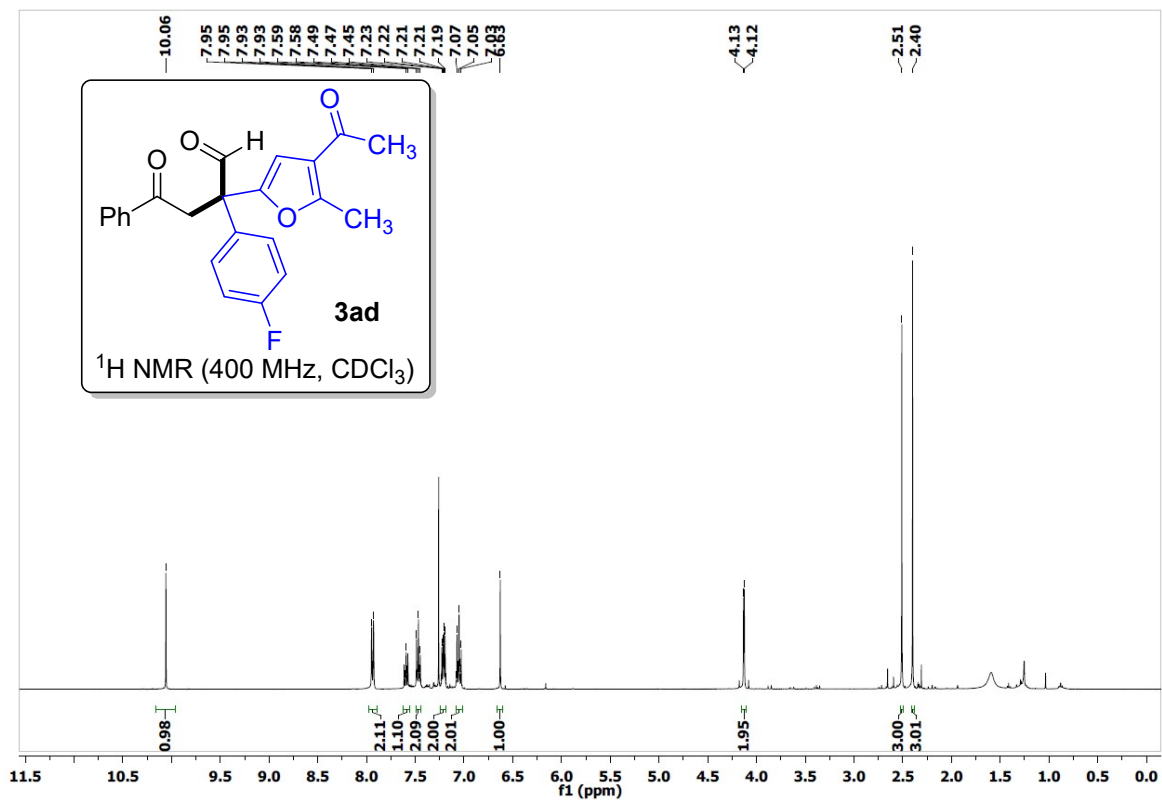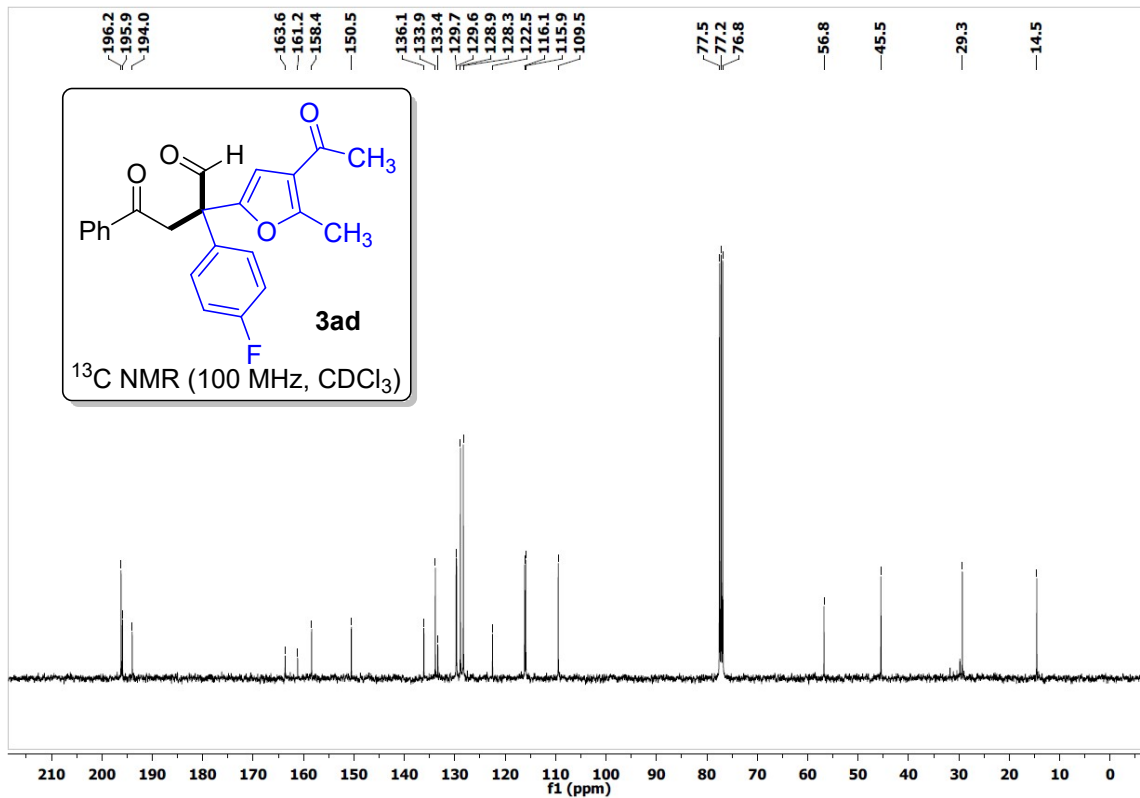

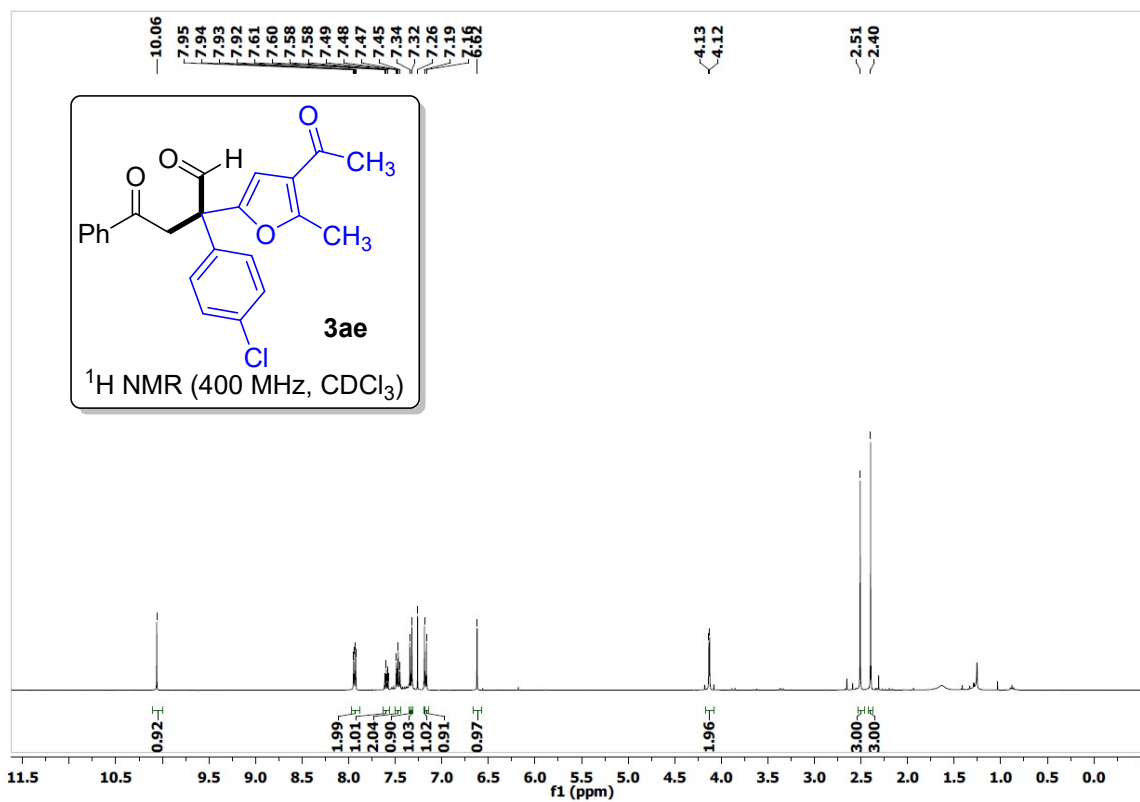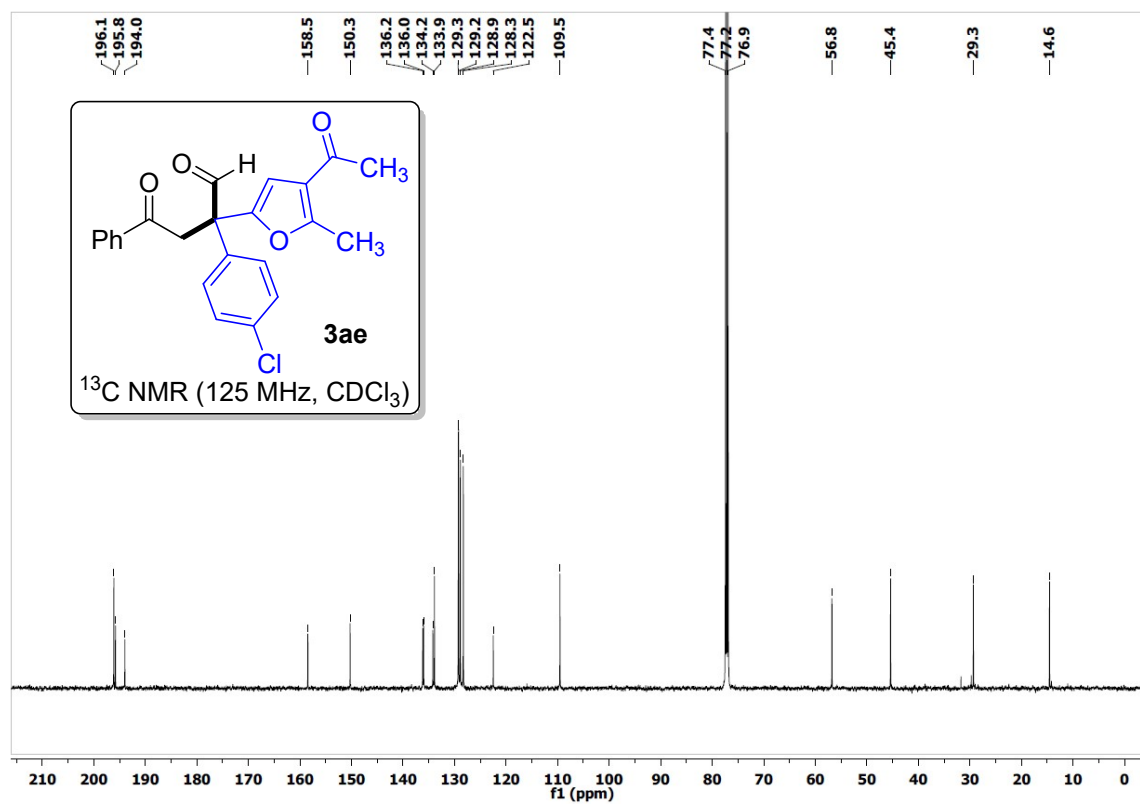

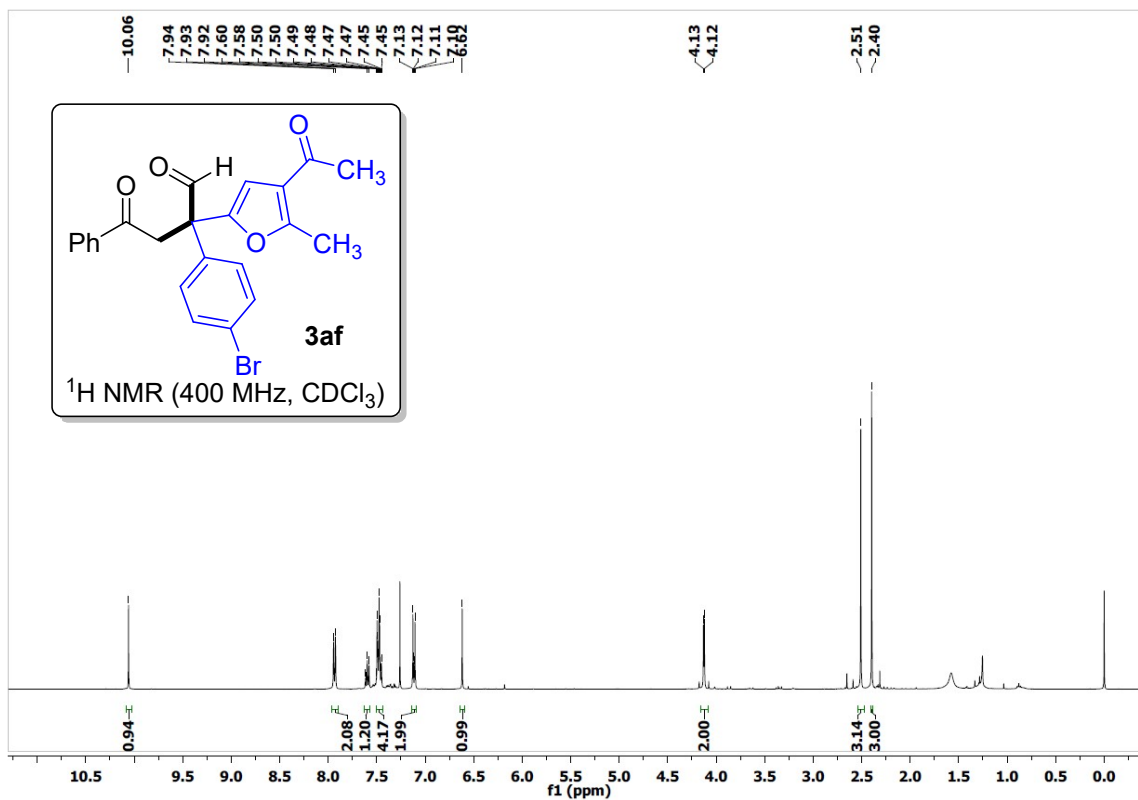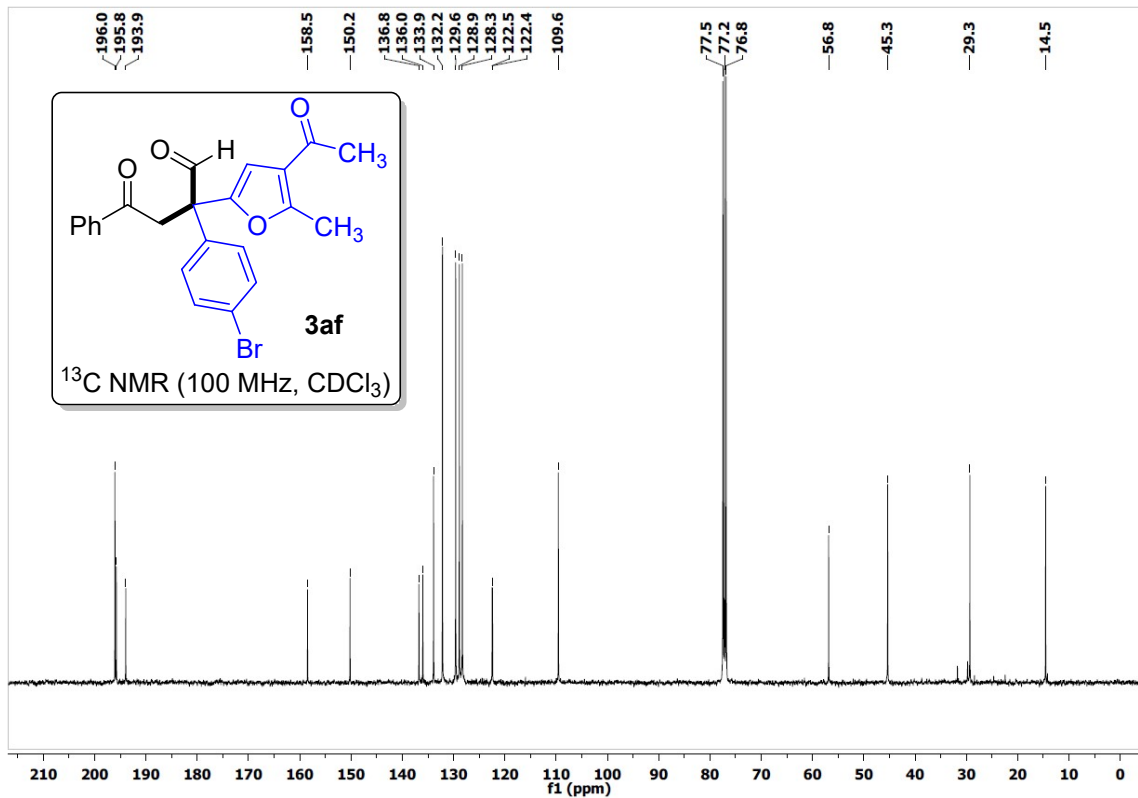

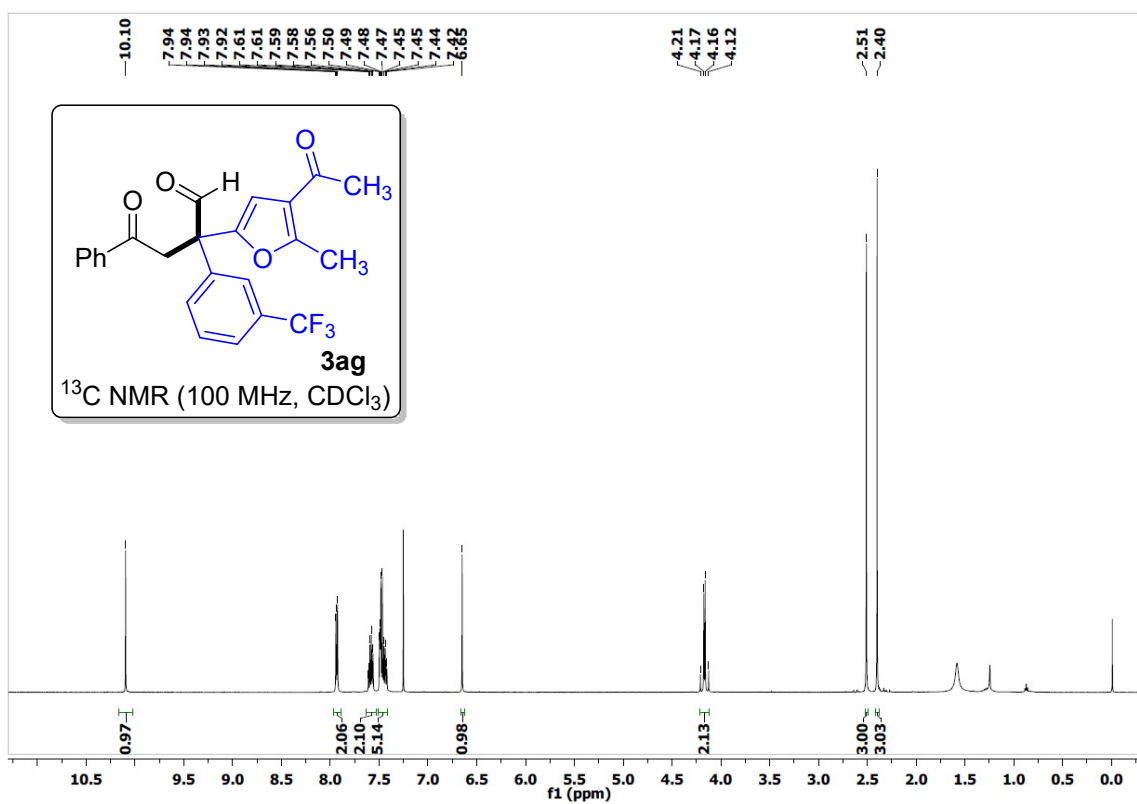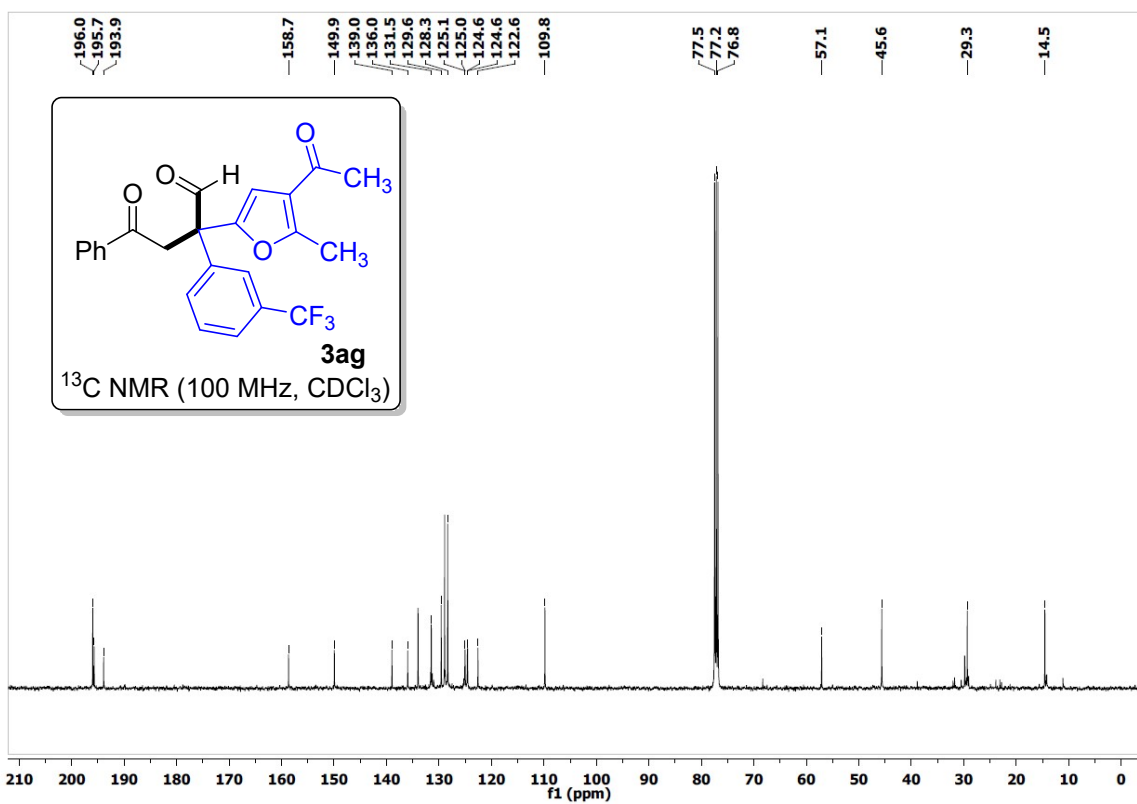

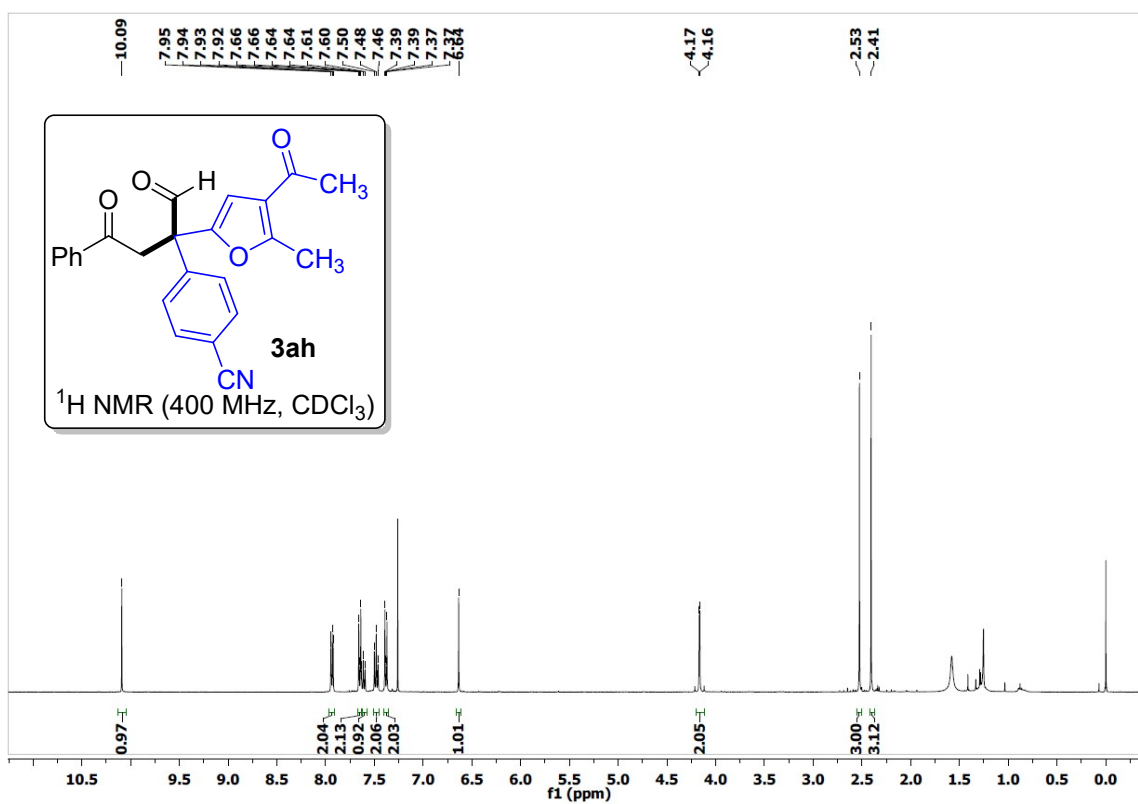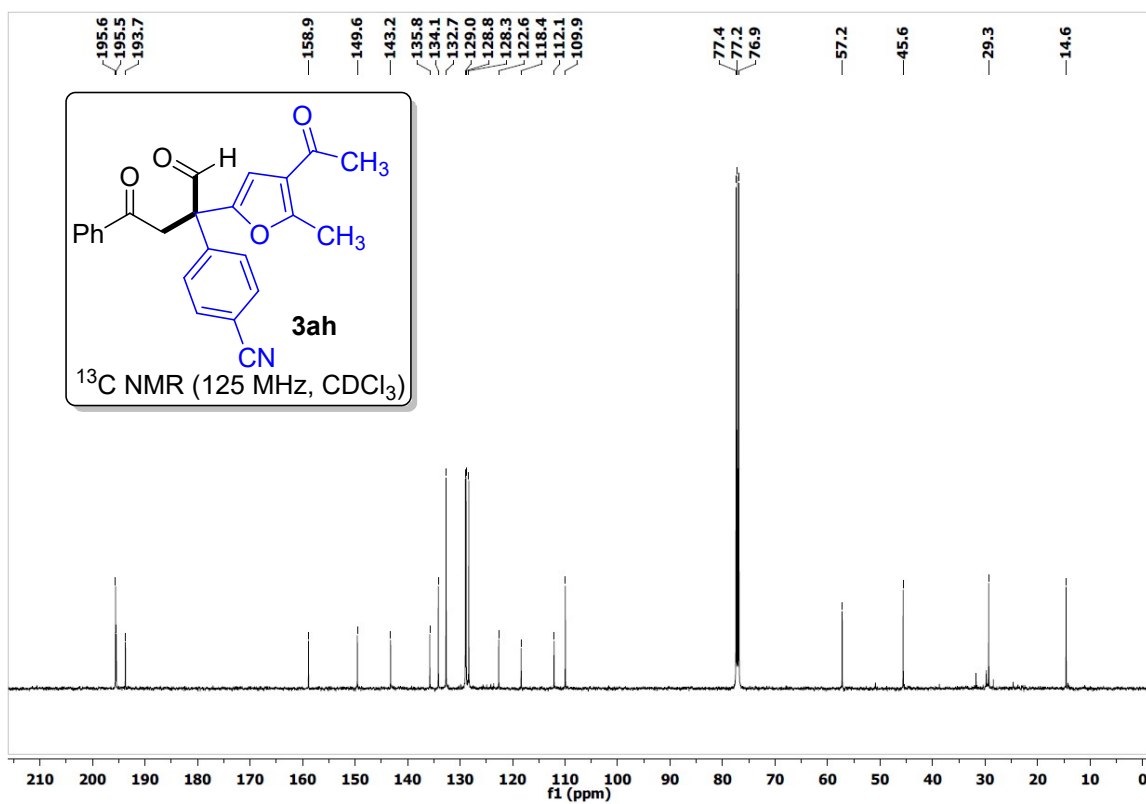

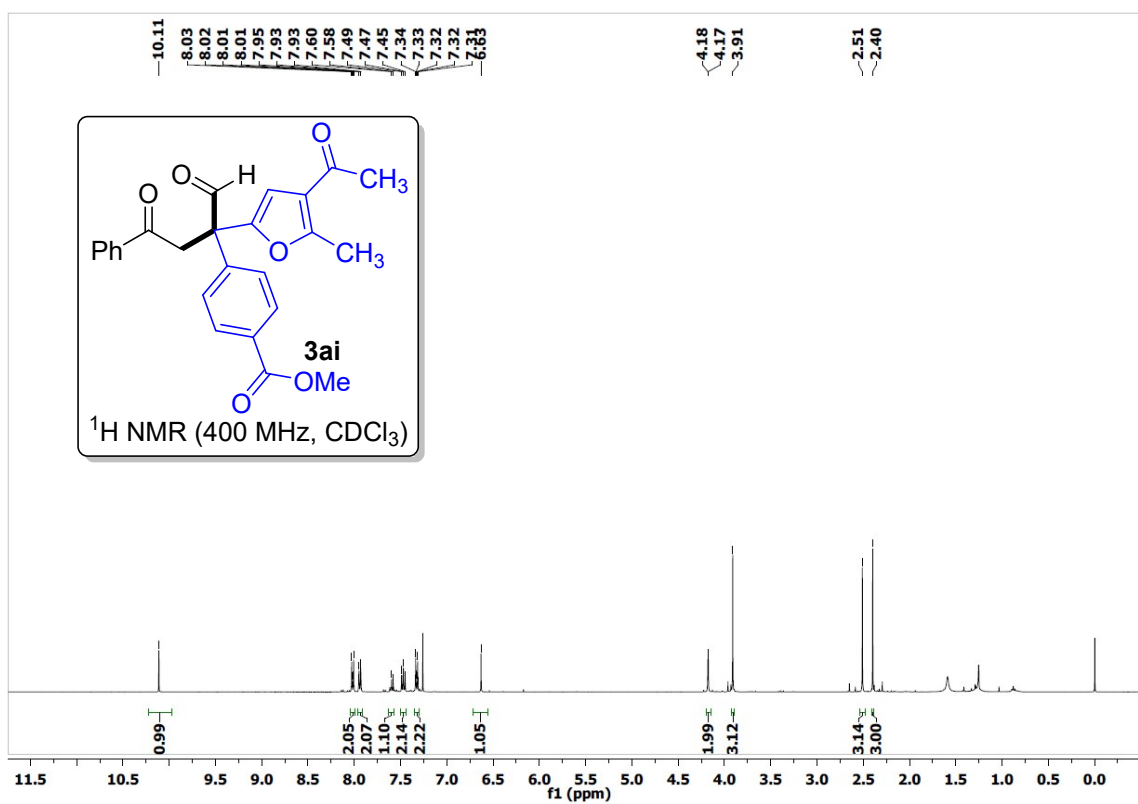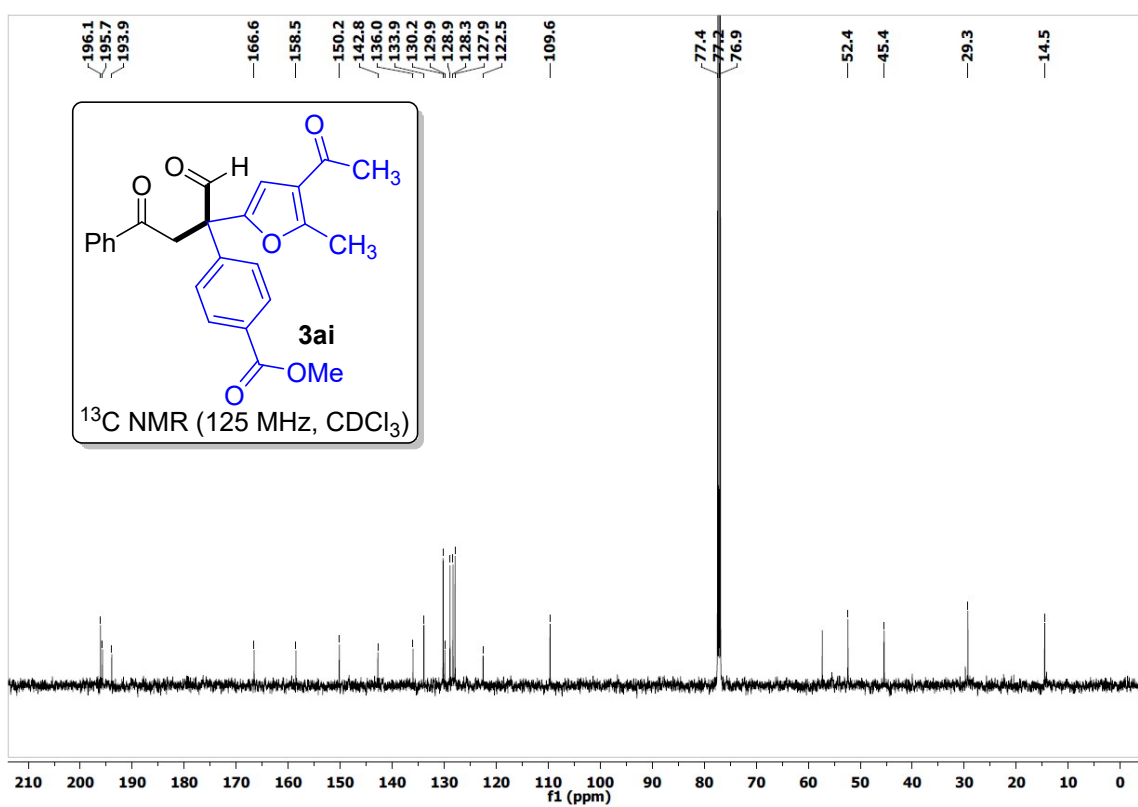



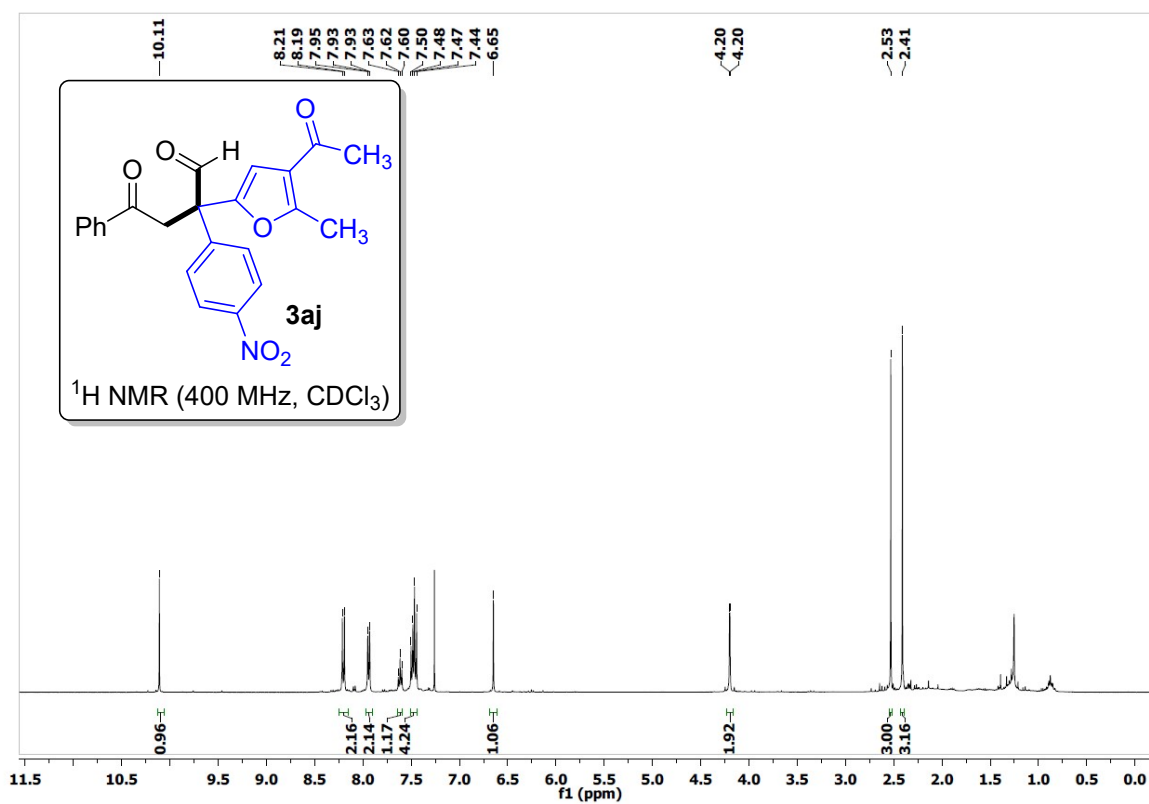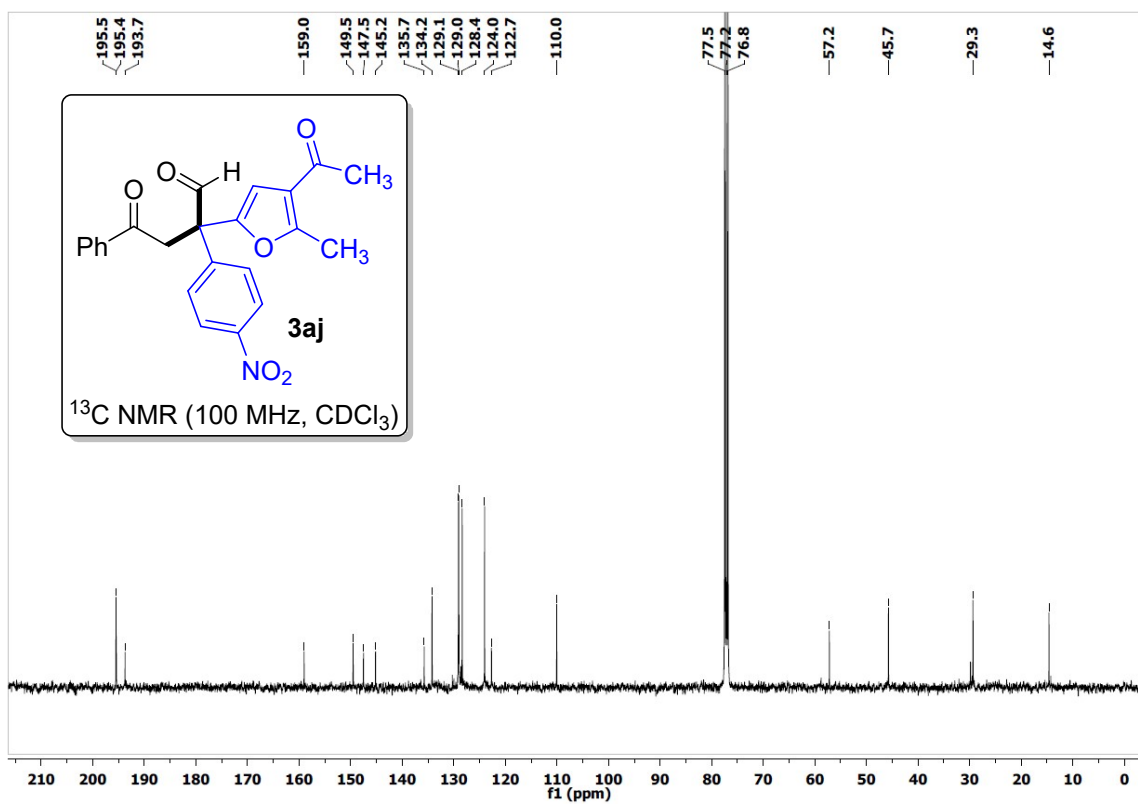

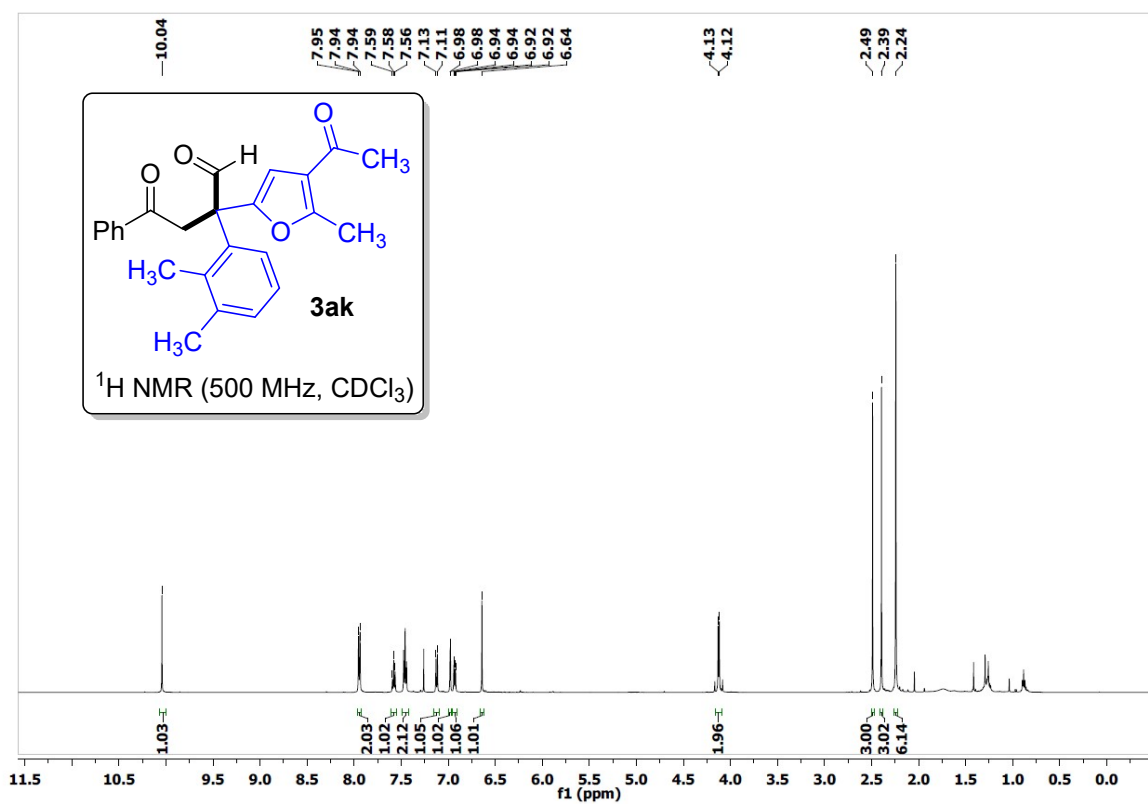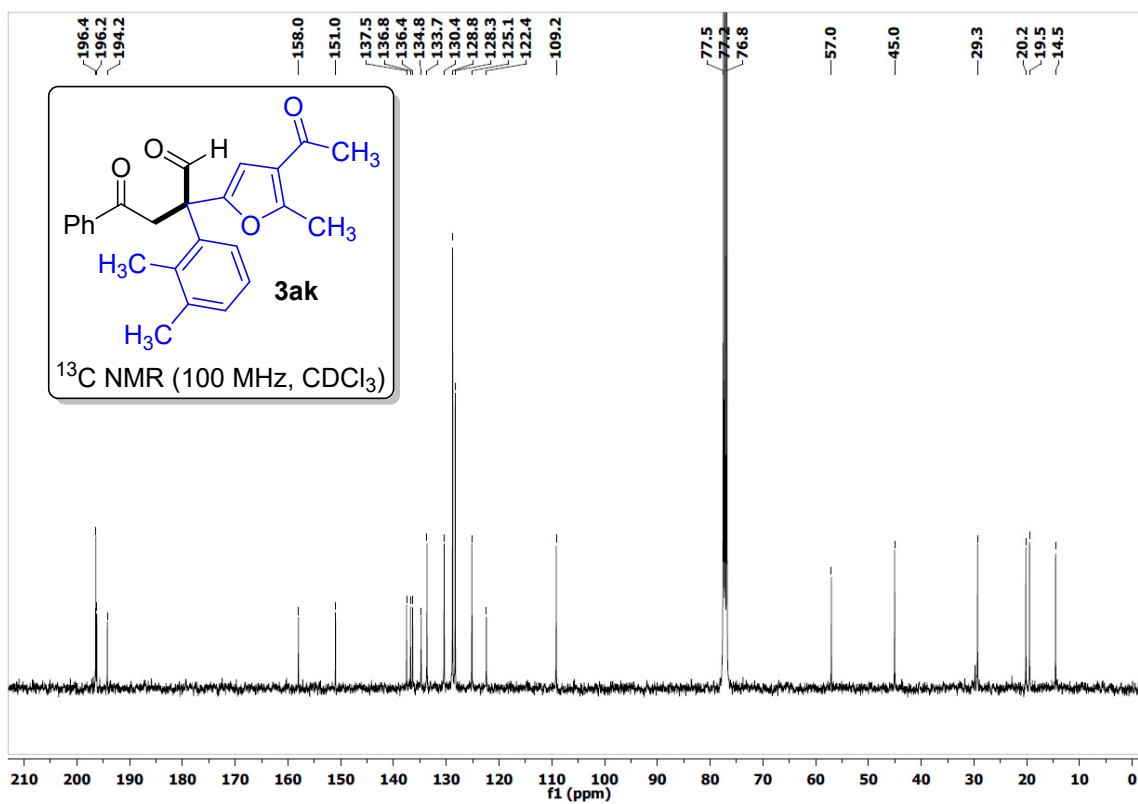

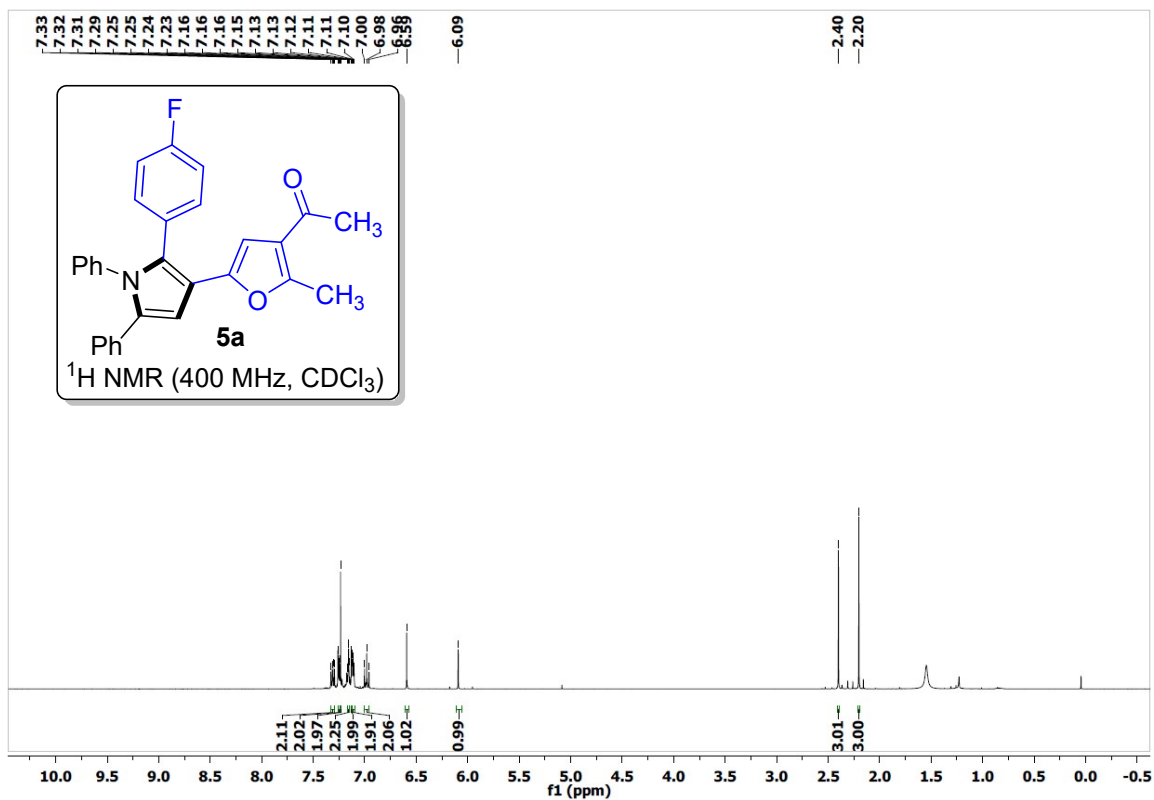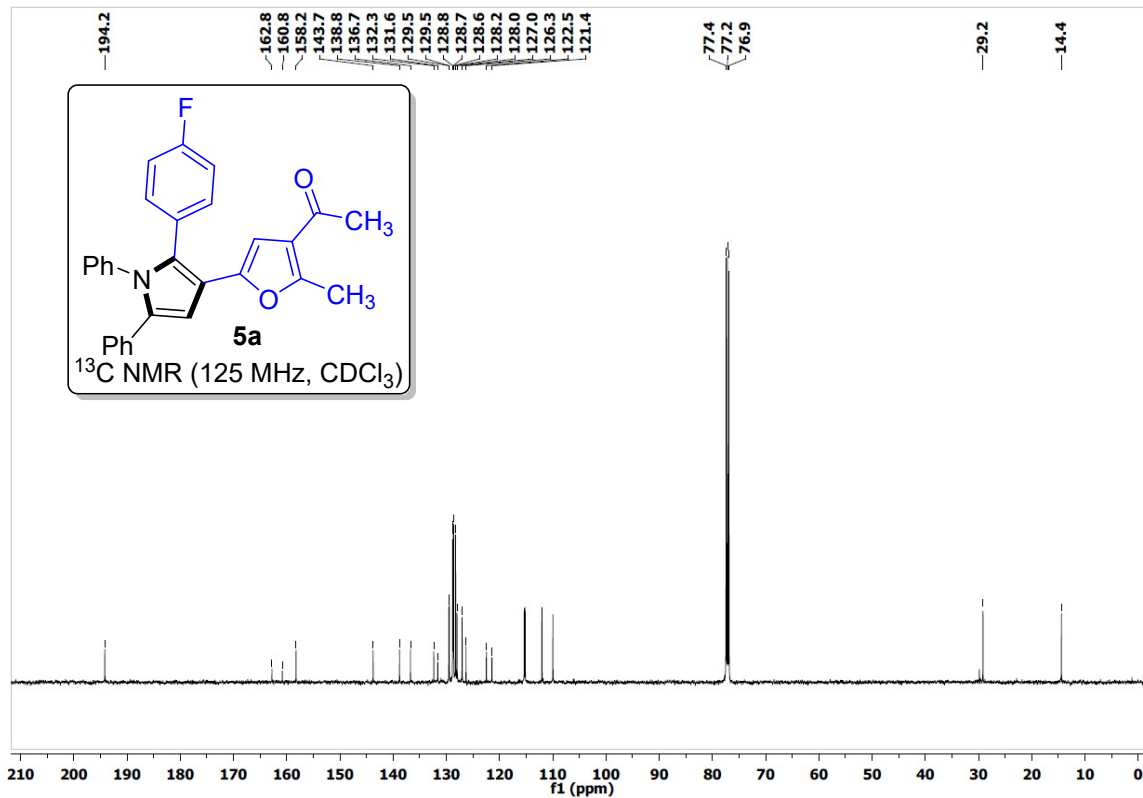

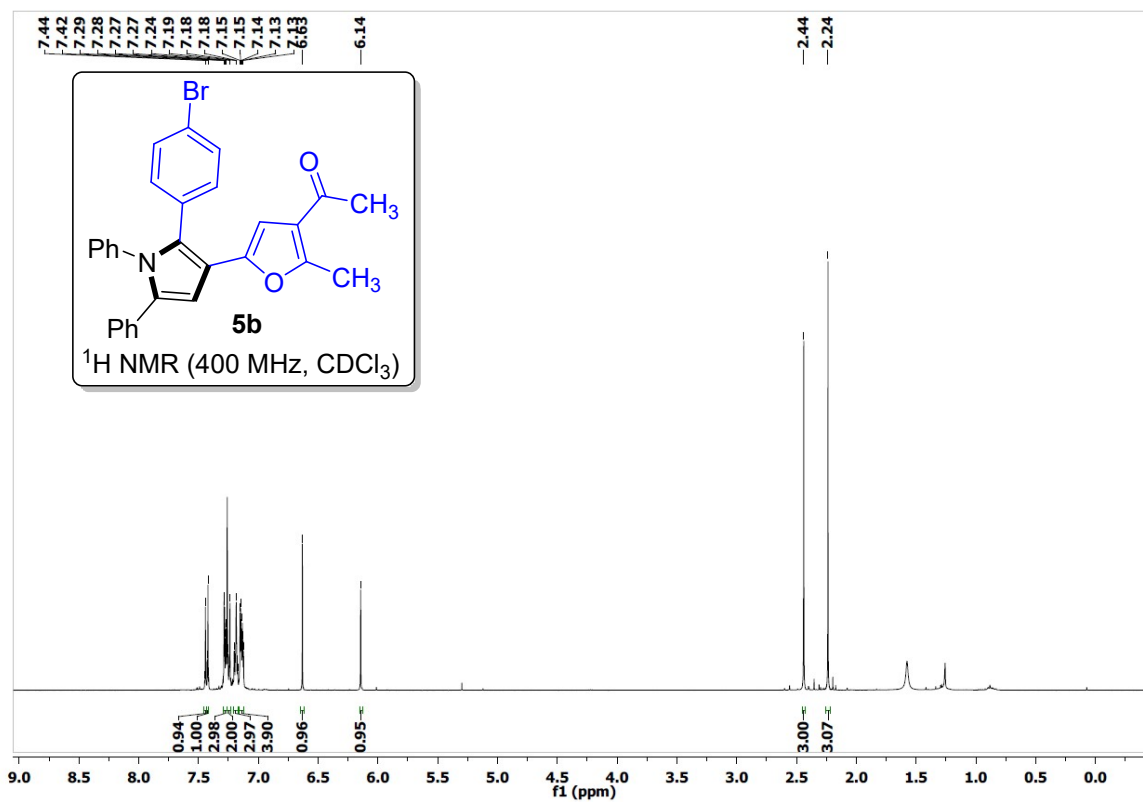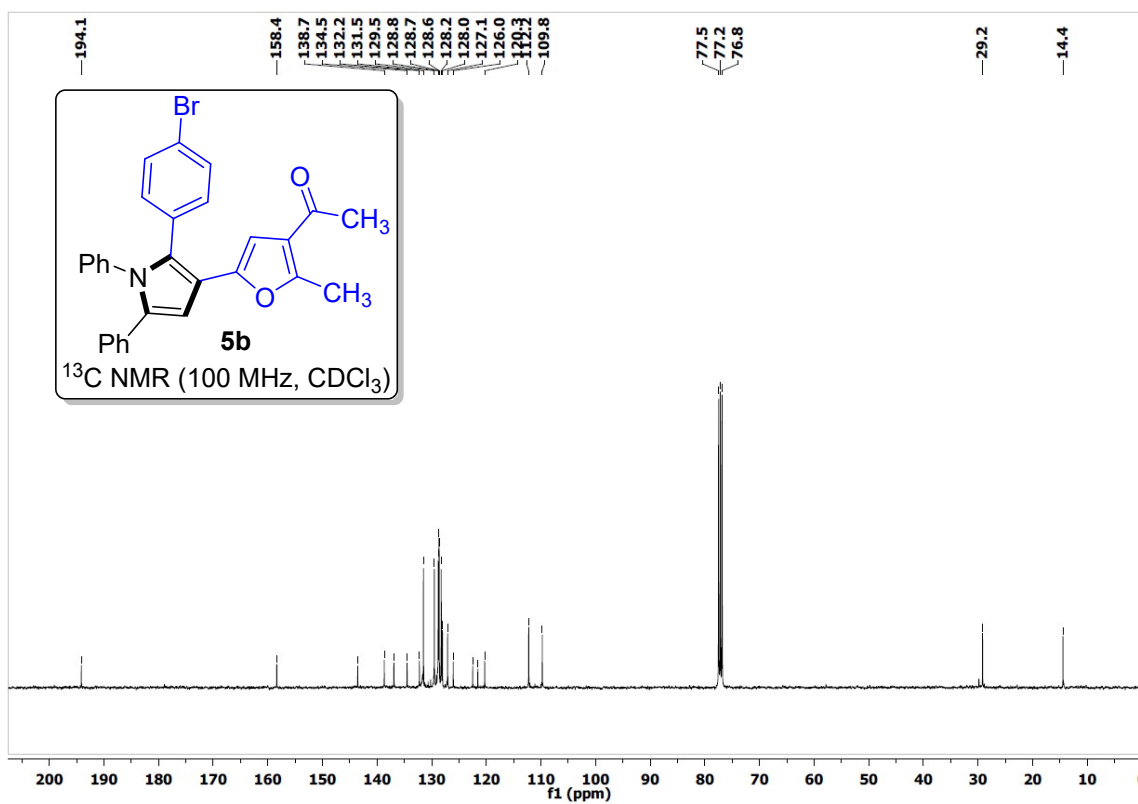

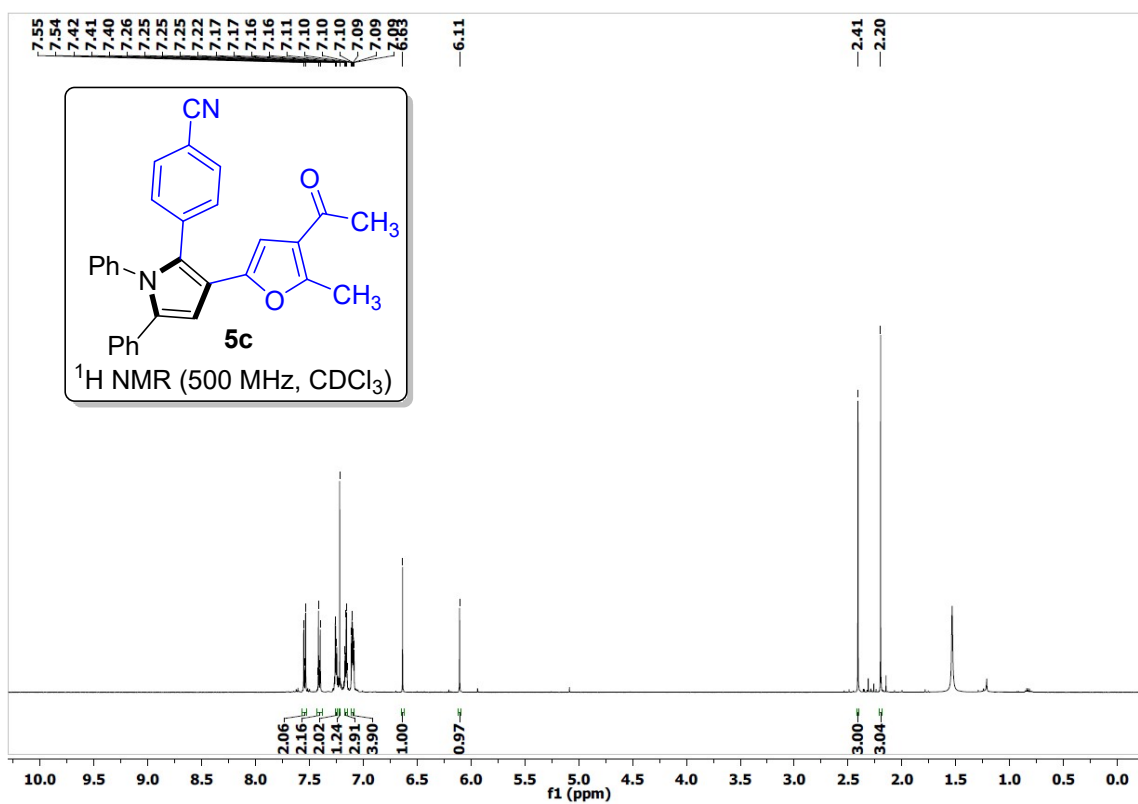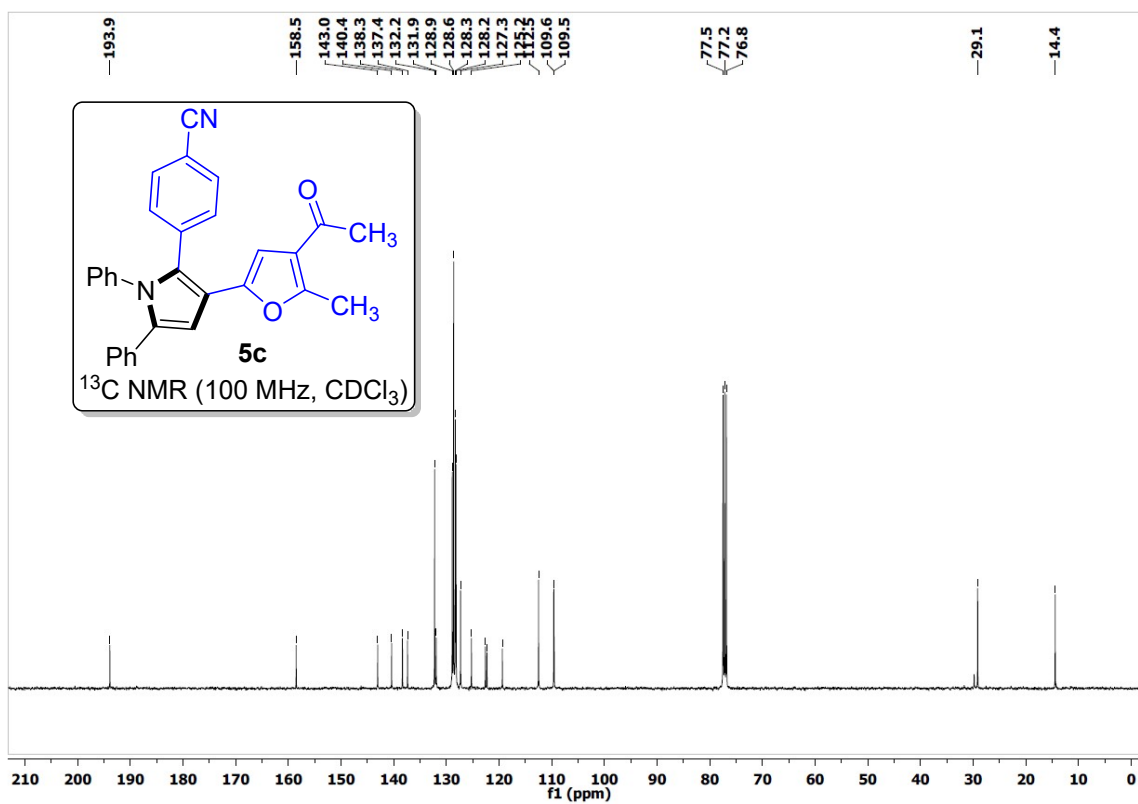

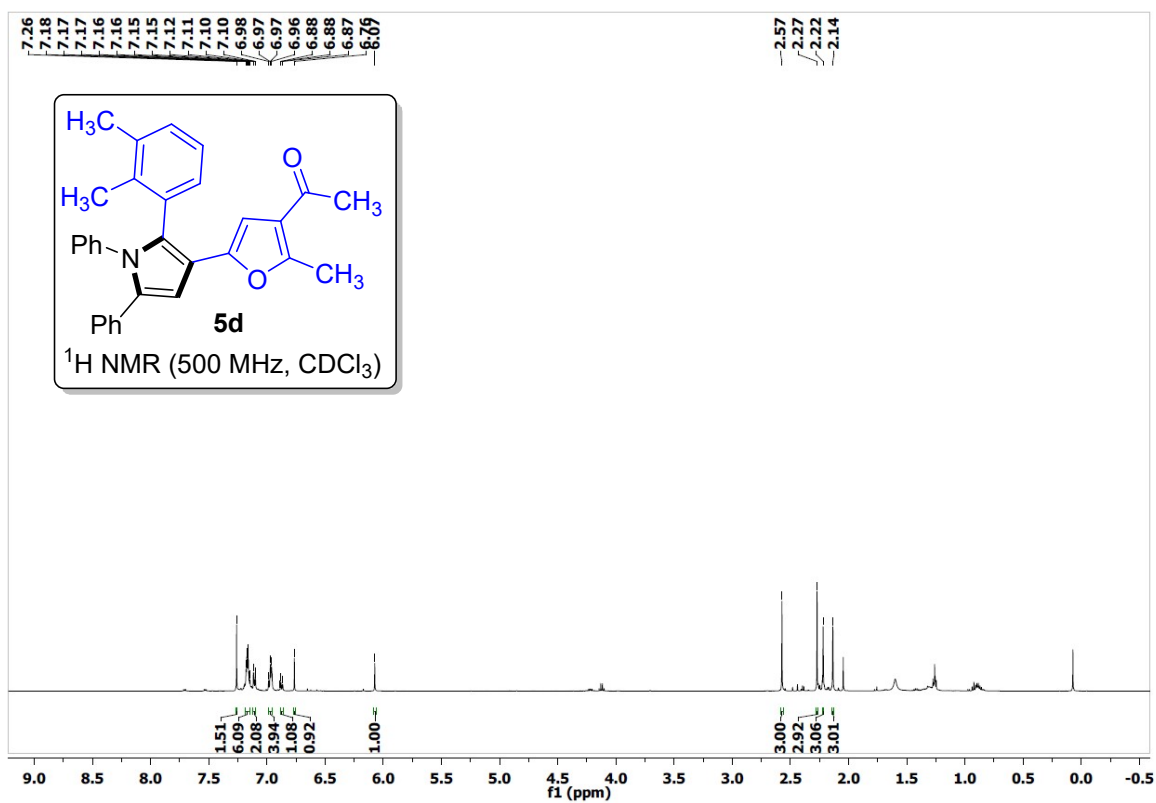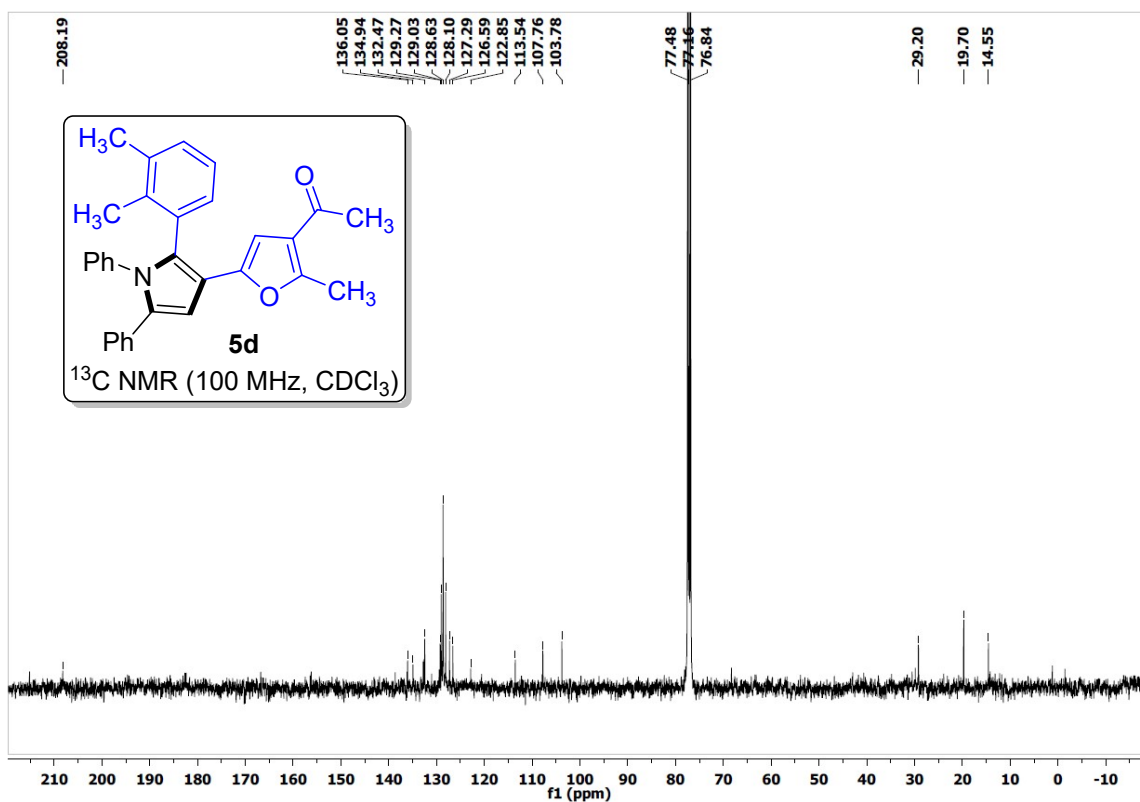

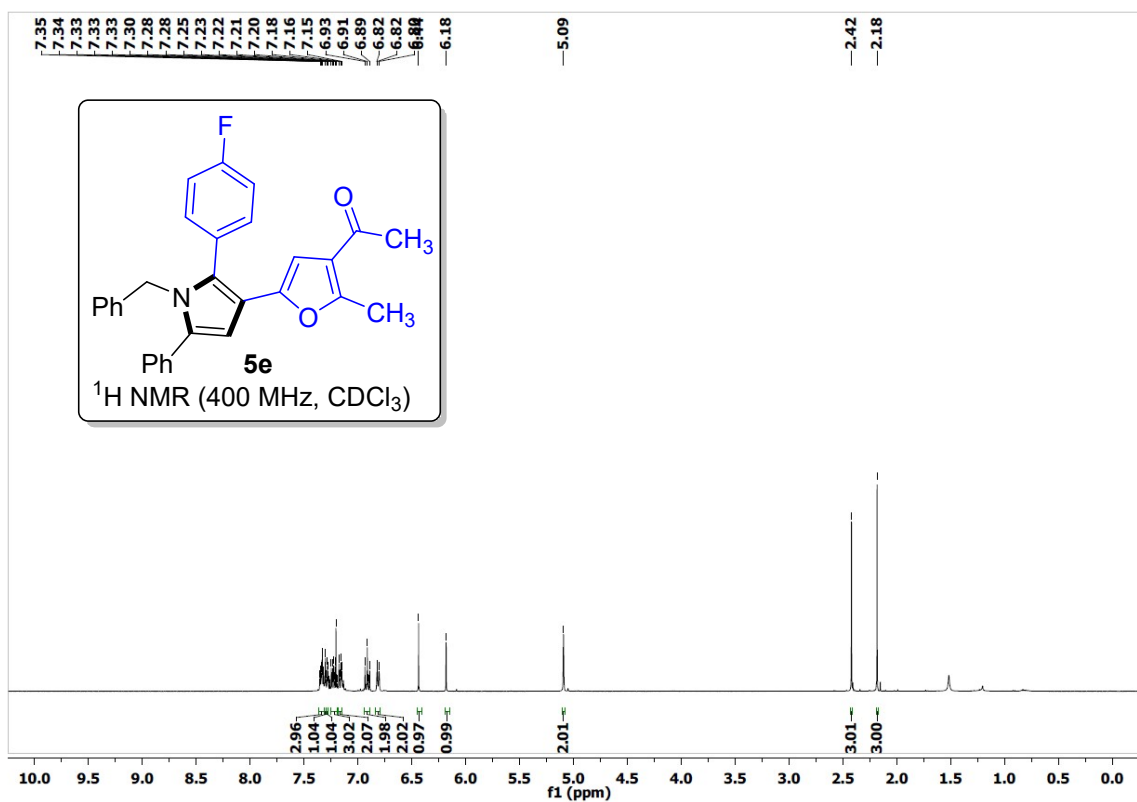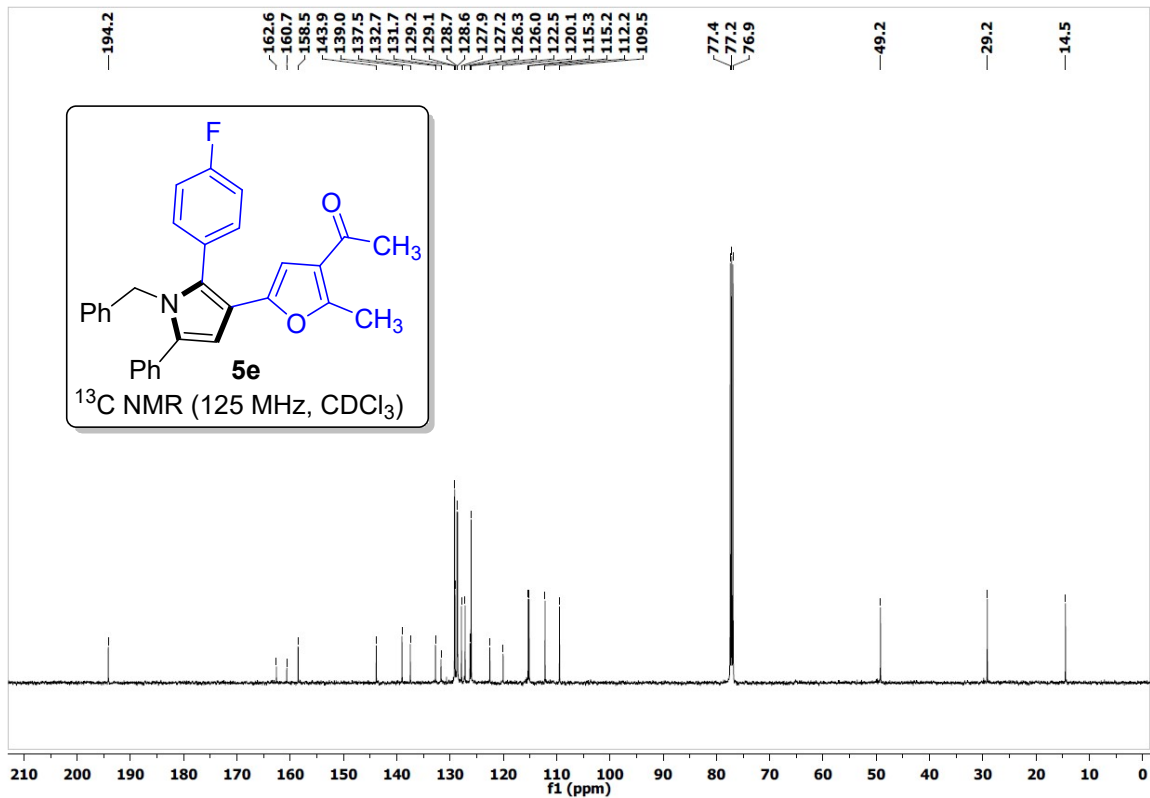

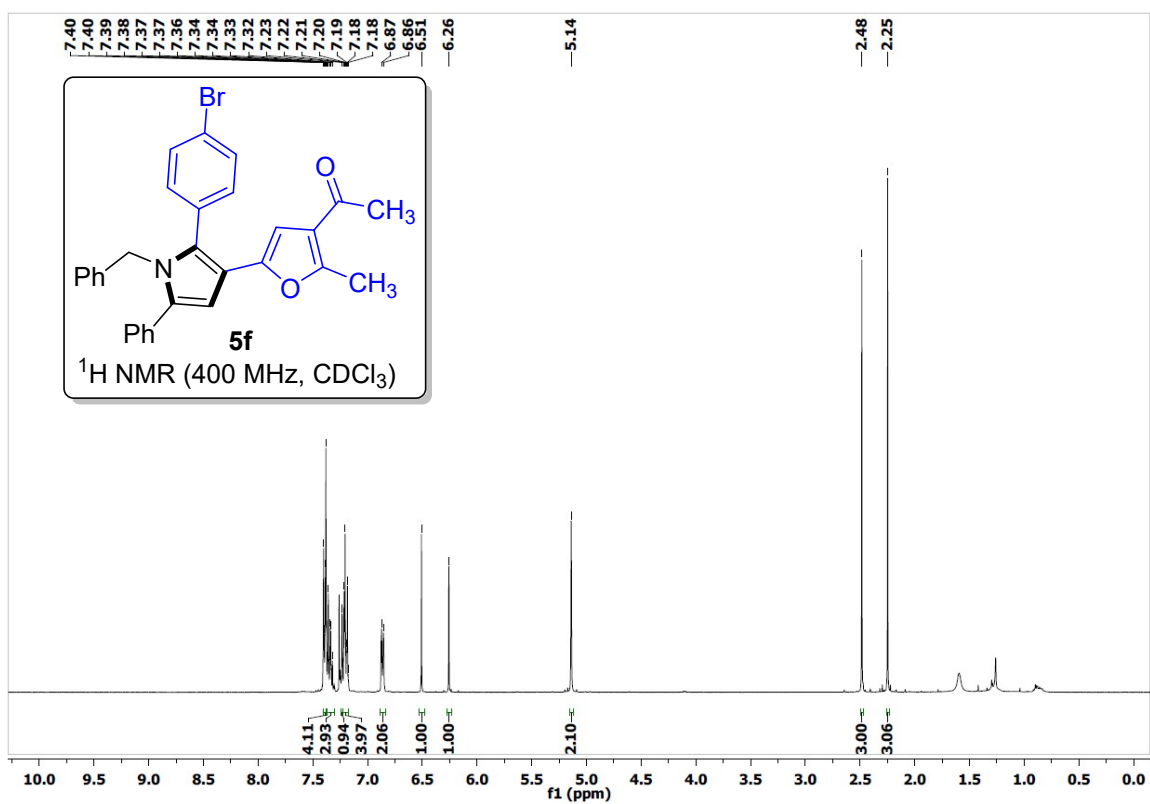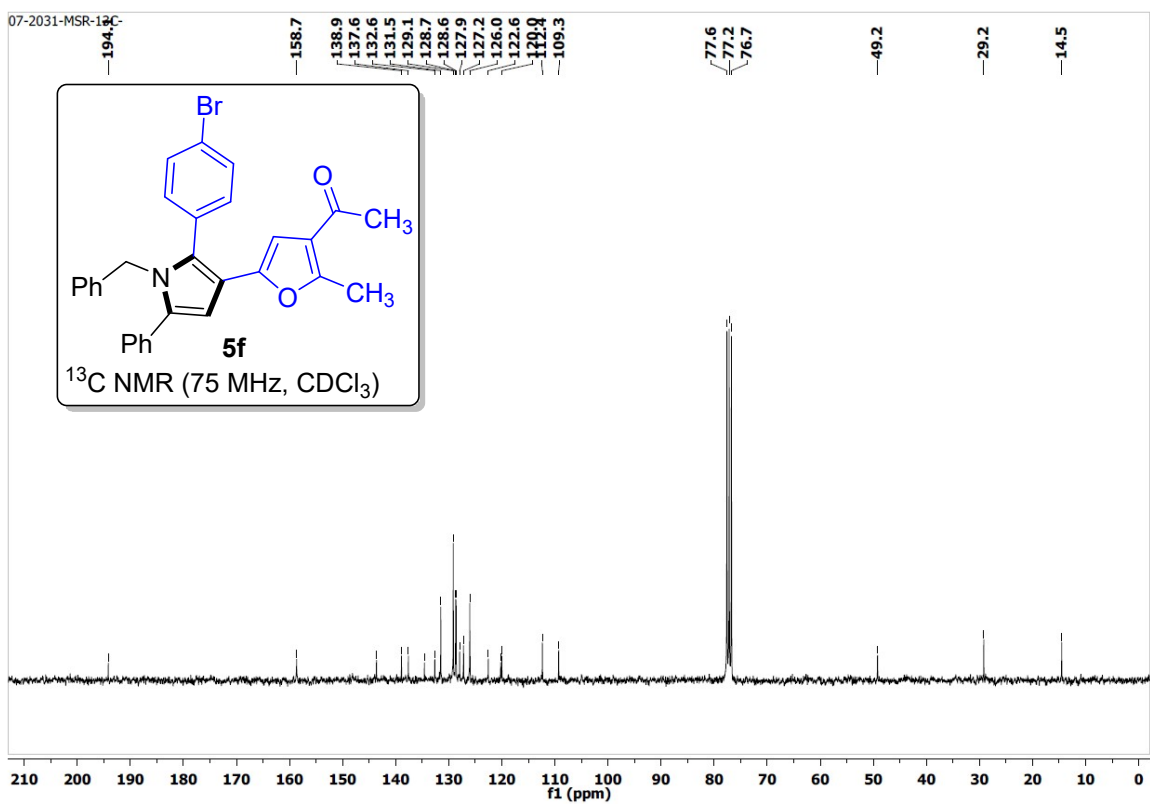



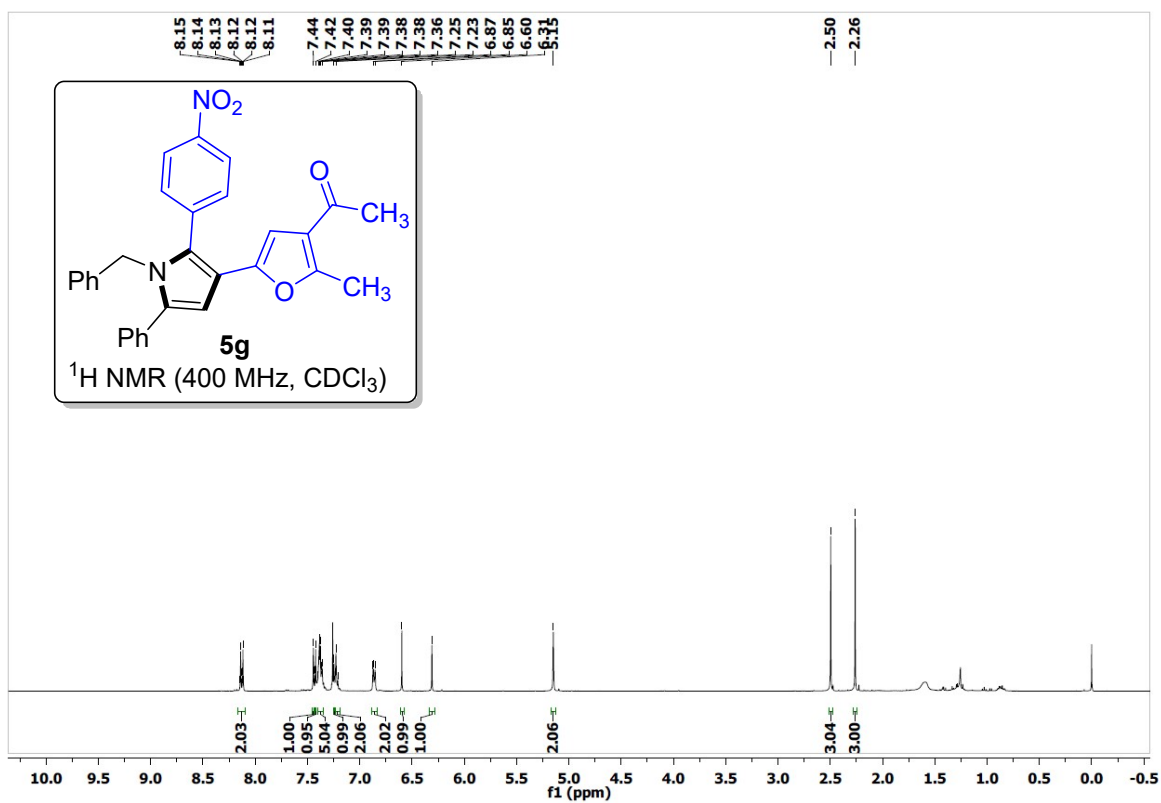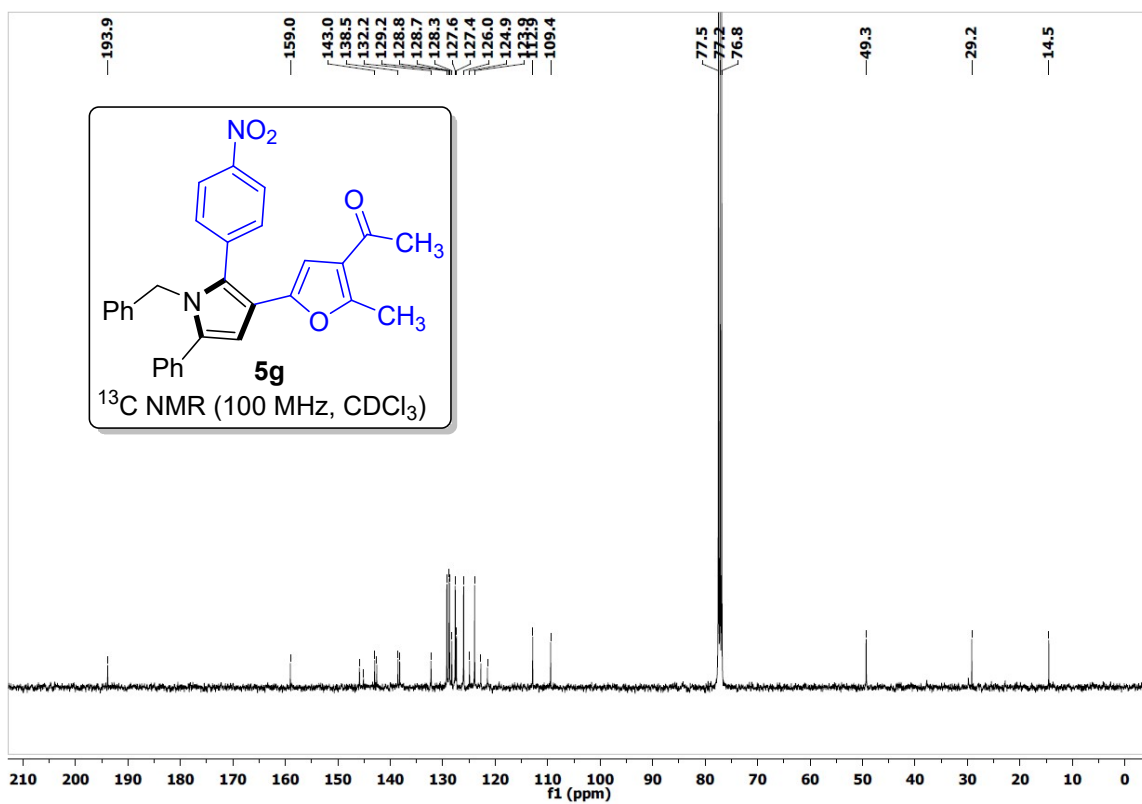

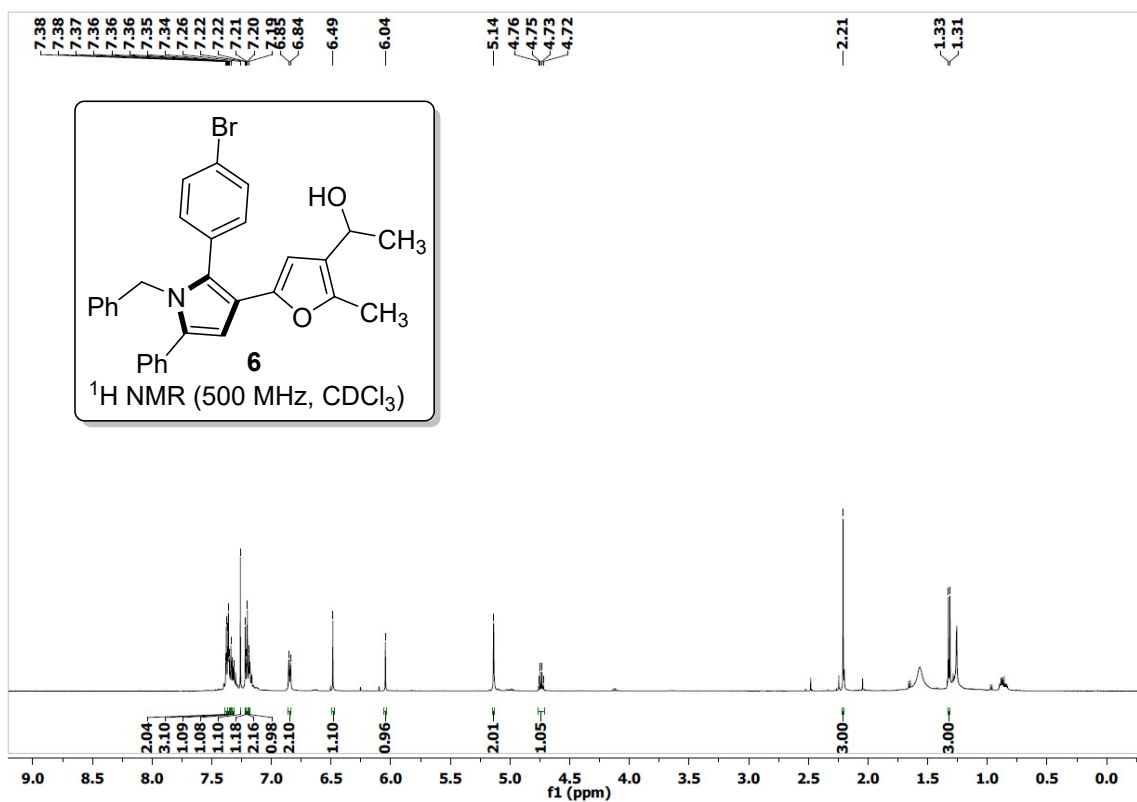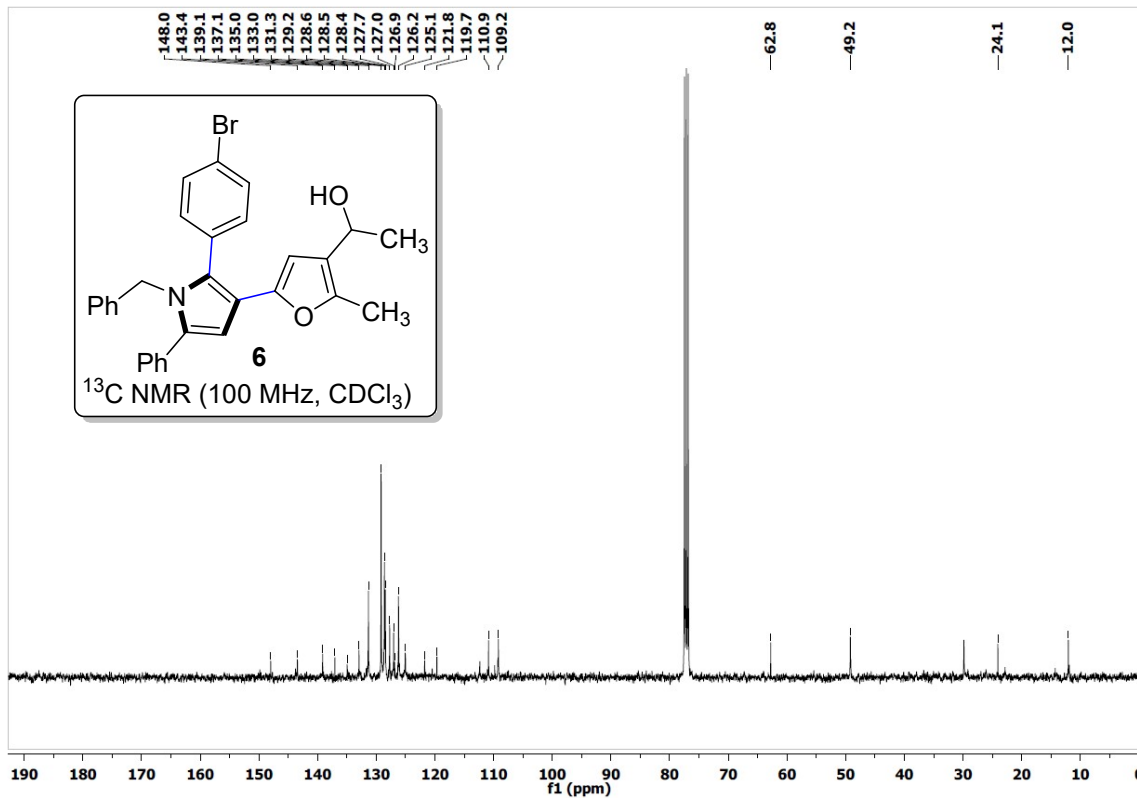

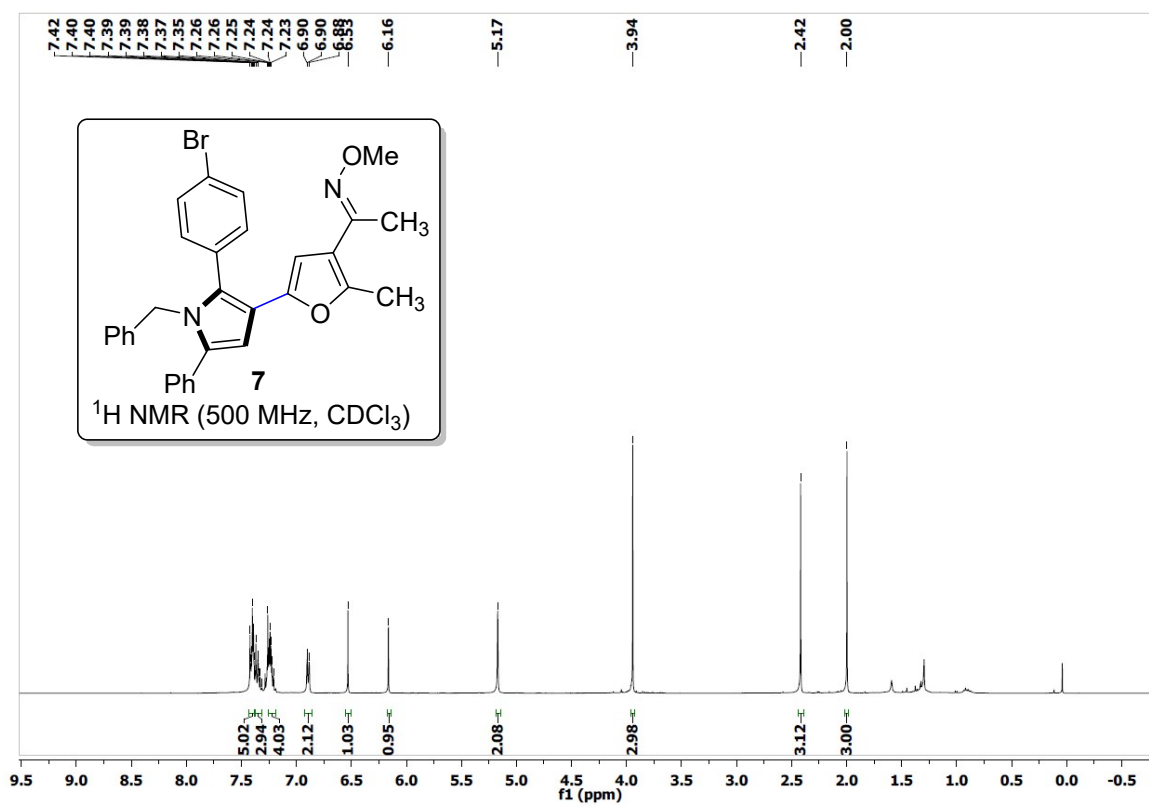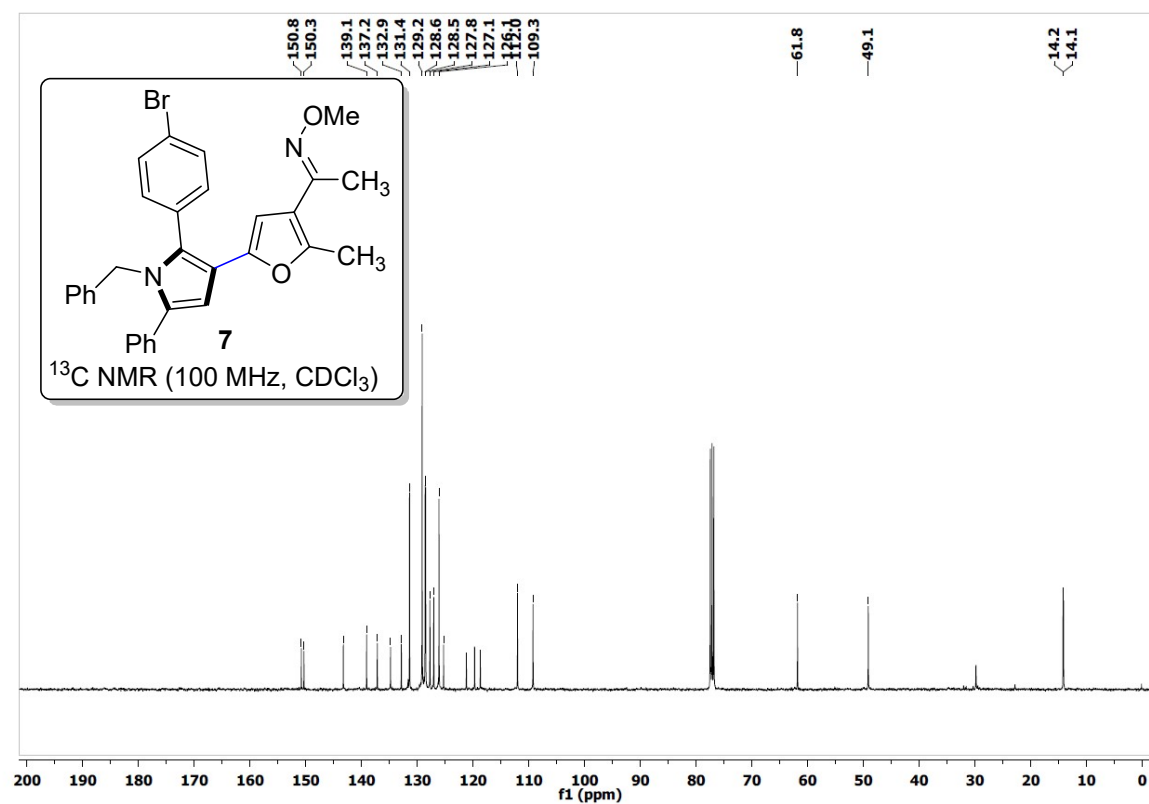

Supplement: d2ob00839d1.pdf [file d2ob00839d1.pdf]
